# Supplementary material
Source: publisher figshare collection journal article supplement (https://acs.figshare.com/ndownloader/files/25035892)
Supplement: Supplementary file 1 [file 25035892]

## Sheet: Sheet1
Supplementary File S3 GO function annotation of the 78 differentially expressed proteins
GO	level	depth	name	namespace	def	nums_of_GOs	GOs	num_of_Accs	Accs	Accs_GO
GO:0003674	1	1	molecular_function	molecular_function	The actions of a single gene product or complex at the molecular level consisting of a single biochemical activity or multiple causally linked biochemical activities. A given gene product may exhibit one or more molecular functions. [GOC:go_curators]	90	GO:0004252;GO:0030229;GO:0004866;GO:0001077;GO:0008270;GO:0016866;GO:0000166;GO:0016740;GO:0046872;GO:0003980;GO:0046982;GO:0005090;GO:0003924;GO:0004386;GO:0019901;GO:0019903;GO:0019902;GO:0004784;GO:0044212;GO:0016818;GO:0047485;GO:0016817;GO:0017069;GO:0004550;GO:0016757;GO:0033897;GO:0042393;GO:0051020;GO:0003676;GO:0003677;GO:0001096;GO:0008649;GO:0003779;GO:0050431;GO:0005524;GO:0005525;GO:…	43	F1SJQ4;F1RP31;F1RFL5;K7GKY0;F1S568;I3L7Q8;F1RWS7;F1RHJ0;Q06A97;F1SA54;Q0Z8R0;F1RPV8;I3LTC4;F1S7L7;F1RU26;I3L7C2;F1S9L2;F1SJG5;F1SDW4;F1S6I1;F1S5K2;F1SED4;F1SLA2;C9E1C9;I3LT15;P79379;F6Q8T7;F1SP42;I3LM88;Q767M0;F1SG36;I3LUD1;F1RNN4;F1SUE6;G9BWQ2;F1S8G9;K7GKN2;F1SEA5;F1RP50;I3LFY4;I3LH80;F1SBX8;E7CXS1	F1SJQ4(GO:0003676;GO:0003723;GO:0003723;GO:0003723);F1RP31(GO:0000977;GO:0003677;GO:0003677;GO:0003677;GO:0046983);F1RFL5(GO:0000166;GO:0003676;GO:0003723;GO:0003723;GO:0004004;GO:0004386;GO:0005524;GO:0005524;GO:0016787);K7GKY0(GO:0004866;GO:0050431);F1S568(GO:0016757);I3L7Q8(GO:0019903);F1RWS7(GO:0001096;GO:0008420;GO:0008420;GO:0030957);F1RHJ0(GO:0000179;GO:0008649);Q06A97(GO:0005509;GO:000550…
GO:0008150	1	1	biological_process	biological_process	Any process specifically pertinent to the functioning of integrated living units: cells, tissues, organs, and organisms. A process is a collection of molecular events with a defined beginning and end. [GOC:go_curators, GOC:isa_complete]	167	GO:0008589;GO:0006470;GO:0032439;GO:0050680;GO:0061025;GO:0007296;GO:0007165;GO:0031056;GO:0030500;GO:2000144;GO:0016180;GO:0007219;GO:0021591;GO:0007512;GO:0009615;GO:0007368;GO:0070979;GO:0010466;GO:0031293;GO:0031297;GO:0021522;GO:0006282;GO:2000553;GO:0006281;GO:0006289;GO:0051592;GO:0007283;GO:0008360;GO:0034165;GO:0045944;GO:0030512;GO:0055114;GO:0031668;GO:0030968;GO:0036071;GO:0000154;GO:…	49	I3LPC6;F1RP31;F1RFL5;K7GKY0;F1RXZ6;I3L7Q8;F1RWS7;F1RHJ0;Q06A97;F1SA54;Q0Z8R0;F1RPV8;I3LTC4;F1S7L7;F1SDW4;F1RU26;F1SCY2;F1S9L2;F1SJG5;F1SP42;I3LF05;F1S6I1;F1S5K2;F1SED4;C9E1C9;I3LT15;P79379;F1RFZ6;K7GN56;F1SNA6;F1SJQ4;F1STY6;F6Q8T7;F1RUL8;I3LM88;F1SG36;I3LUD1;F1RNN4;F1SUE6;G9BWQ2;F1S8G9;K7GKN2;F1SEA5;F1RP50;F1SJ46;I3LDJ9;I3LH80;F1SBX8;E7CXS1	I3LPC6(GO:0001841;GO:0001843;GO:0001947;GO:0007219;GO:0007224;GO:0007368;GO:0007420;GO:0007507;GO:0008544;GO:0008589;GO:0009953;GO:0016485;GO:0021522;GO:0021915;GO:0031122;GO:0045880;GO:0050680;GO:0060021;GO:0060173;GO:0060271;GO:0060271;GO:0060271;GO:0060348;GO:0061525;GO:0070986;GO:1905515);F1RP31(GO:0006351;GO:0006351;GO:0006355;GO:0006355;GO:0045944);F1RFL5(GO:0010501);K7GKY0(GO:0001933;GO:00…
GO:0005575	1	1	cellular_component	cellular_component	The part of a cell, extracellular environment or virus in which a gene product is located. A gene product may be located in one or more parts of a cell and its location may be as specific as a particular macromolecular complex, that is, a stable, persistent association of macromolecules that function together. [GOC:go_curators, NIF_Subcellular:sao-1337158144]	74	GO:0008023;GO:0015934;GO:0005783;GO:0030992;GO:0016607;GO:0005789;GO:0030176;GO:0036464;GO:0005929;GO:0097598;GO:0008024;GO:0016591;GO:0005622;GO:0032580;GO:0015629;GO:0005856;GO:0036064;GO:0016605;GO:0005819;GO:0030660;GO:0097228;GO:0005730;GO:0031410;GO:0016021;GO:0016020;GO:0005777;GO:0005739;GO:0000922;GO:0005654;GO:0071556;GO:0005576;GO:0005615;GO:0070876;GO:0043005;GO:0033186;GO:0071458;GO:…	48	I3LPC6;F1RP31;F1RFL5;K7GKY0;F1RXZ6;F1S568;I3L7Q8;F1RWS7;Q06A97;F1SA54;F1SJQ4;I3LTC4;F1S7L7;F1RU26;F1S9L2;F1SRJ4;F1SJG5;F1SEA5;I3LF05;F1S6I1;F1S5K2;F1SED4;F1SLA2;C9E1C9;I3LT15;P79379;F1RUH9;F1STY6;F6Q8T7;F1S849;F1SP42;I3LM88;Q767M0;Q0Z8R0;I3LUD1;F1RNN4;F1SUE6;G9BWQ2;F1SKZ6;F1S8G9;F1SG36;K7GKN2;F1SNA6;F1RP50;I3LFY4;F1SJ46;I3LDJ9;E7CXS1	I3LPC6(GO:0005929;GO:0005930;GO:0030992;GO:0030992;GO:0036064;GO:0097225;GO:0097228;GO:0097598;GO:1903561);F1RP31(GO:0005634;GO:0005634;GO:0005634);F1RFL5(GO:0005634;GO:0005634;GO:0005730;GO:0005730;GO:0005730;GO:0005737;GO:0005829;GO:0005829;GO:0016020);K7GKY0(GO:0005576;GO:0005615;GO:0005615;GO:0009986;GO:0016020;GO:0016021);F1RXZ6(GO:0005737);F1S568(GO:0016020;GO:0016021;GO:0016021);I3L7Q8(GO:…
GO:0002376	2	2	immune system process	biological_process	Any process involved in the development or functioning of the immune system, an organismal system for calibrated responses to potential internal or invasive threats. [GO_REF:0000022, GOC:add, GOC:mtg_15nov05]	4	GO:0045087;GO:0051607;GO:0035710;GO:0043367	4	K7GKN2;K7GN56;F1SCY2;F1S9L2	K7GKN2(GO:0045087;GO:0051607;GO:0051607;GO:0051607);K7GN56(GO:0051607);F1SCY2(GO:0051607);F1S9L2(GO:0035710;GO:0043367;GO:0051607;GO:0051607;GO:0051607)
GO:0065007	2	2	biological regulation	biological_process	Any process that modulates a measurable attribute of any biological process, quality or function. [GOC:dph, GOC:isa_complete, GOC:mah, GOC:pr, GOC:vw]	62	GO:2000369;GO:0043547;GO:0008589;GO:0045926;GO:0061045;GO:0043923;GO:0034157;GO:0050680;GO:0010628;GO:0051438;GO:0051147;GO:0031056;GO:0030500;GO:0035556;GO:0042981;GO:0007219;GO:0050709;GO:1900364;GO:0045071;GO:0006882;GO:0030100;GO:0043065;GO:0045747;GO:0006357;GO:0045737;GO:0065009;GO:0010506;GO:1904179;GO:0071157;GO:2001168;GO:0006282;GO:2000553;GO:0045880;GO:0033129;GO:0050790;GO:0001933;GO:…	27	I3LPC6;F1RP31;I3LF05;F1RWS7;Q06A97;Q0Z8R0;F1RU26;F1S9L2;F1SJG5;K7GKY0;F1RP50;F1SED4;C9E1C9;I3LT15;P79379;F1RXZ6;F6Q8T7;F1RUL8;I3LM88;F1SG36;F1SUE6;G9BWQ2;K7GKN2;F1SEA5;F1S6I1;I3LDJ9;I3LH80	I3LPC6(GO:0007219;GO:0007224;GO:0008589;GO:0045880;GO:0050680);F1RP31(GO:0006355;GO:0006355;GO:0045944);I3LF05(GO:0010506;GO:0032008);F1RWS7(GO:0043923;GO:0070940);Q06A97(GO:0051480);Q0Z8R0(GO:0010466;GO:2000117);F1RU26(GO:0006355;GO:0006357;GO:2000144);F1S9L2(GO:0034157;GO:0034165;GO:0045071;GO:0045071;GO:0050709;GO:2000553);F1SJG5(GO:0006355);K7GKY0(GO:0001933;GO:0010839;GO:0010951;GO:0030512;G…
GO:0008152	2	2	metabolic process	biological_process	The chemical reactions and pathways, including anabolism and catabolism, by which living organisms transform chemical substances. Metabolic processes typically transform small molecules, but also include macromolecular processes such as DNA repair and replication, and protein synthesis and degradation. [GOC:go_curators, ISBN:0198547684]	41	GO:0018105;GO:0006470;GO:0006801;GO:0016567;GO:0016180;GO:0006486;GO:0019430;GO:0006228;GO:0055114;GO:0006241;GO:0061614;GO:0006364;GO:0006366;GO:0031293;GO:0006368;GO:0032259;GO:0031297;GO:0018279;GO:0097359;GO:0006468;GO:0006281;GO:0016310;GO:0006289;GO:0031167;GO:0006508;GO:0016485;GO:0005975;GO:0006183;GO:0090502;GO:0010501;GO:0070940;GO:0036071;GO:0000154;GO:0030490;GO:0070816;GO:0070979;GO:…	26	I3LPC6;F1RP31;F1RFL5;I3L7Q8;F1RWS7;F1RHJ0;F1SA54;F1RPV8;I3LTC4;F1RU26;F1S6I1;F1S5K2;C9E1C9;I3LT15;F1SDW4;F1RFZ6;F1SNA6;F1STY6;F6Q8T7;I3LM88;I3LUD1;F1SUE6;G9BWQ2;F1S8G9;F1RP50;F1SBX8	I3LPC6(GO:0016485);F1RP31(GO:0006351;GO:0006351);F1RFL5(GO:0010501);I3L7Q8(GO:0070979);F1RWS7(GO:0006470;GO:0070940);F1RHJ0(GO:0000154;GO:0031167;GO:0032259);F1SA54(GO:0006486;GO:0033578;GO:0036071);F1RPV8(GO:0006165;GO:0006183;GO:0006228;GO:0006241);I3LTC4(GO:0006412);F1RU26(GO:0061614);F1S6I1(GO:0016567);F1S5K2(GO:0005975);C9E1C9(GO:0006368;GO:0006468;GO:0006468;GO:0031297;GO:0070816);I3LT15(GO…
GO:0032991	2	2	macromolecular complex	cellular_component	A stable assembly of two or more macromolecules, i.e. proteins, nucleic acids, carbohydrates or lipids, in which at least one component is a protein and the constituent parts function together. [GOC:dos, GOC:mah]	18	GO:0061700;GO:0043234;GO:0008023;GO:0015934;GO:0031080;GO:0030992;GO:0033186;GO:0032039;GO:0005675;GO:0070876;GO:0005762;GO:0016514;GO:0008024;GO:0016591;GO:0005680;GO:0031462;GO:0000776;GO:0036464	16	I3LTC4;C9E1C9;I3LPC6;F1SRJ4;I3LF05;F1RNN4;F1SJG5;I3L7Q8;F1S6I1;F1RWS7;F1SNA6;F1RP50;F1STY6;F1S7L7;F6Q8T7;F1SJQ4	I3LTC4(GO:0005762;GO:0015934);C9E1C9(GO:0008023;GO:0008024;GO:0008024;GO:0008024;GO:0036464;GO:0036464);I3LPC6(GO:0030992;GO:0030992);F1SRJ4(GO:0000776;GO:0031080;GO:0031080);I3LF05(GO:0061700);F1RNN4(GO:0030992;GO:0030992;GO:0030992);F1SJG5(GO:0016514);I3L7Q8(GO:0005680);F1S6I1(GO:0031462);F1RWS7(GO:0016591;GO:0043234);F1SNA6(GO:0070876;GO:0070876);F1RP50(GO:0043234);F1STY6(GO:0032039);F1S7L7(GO…
GO:0140110	2	2	transcription regulator activity	molecular_function	A molecular function that controls the rate, timing and/or magnitude of transcription of genetic information. The function of transcriptional regulators is to modulate gene expression at the transcription step so that they are expressed in the right cell at the right time and in the right amount throughout the life of the cell and the organism. [GOC:pg, Wikipedia:Transcription_factor]	2	GO:0003700;GO:0001077	2	F1RU26;I3LM88	F1RU26(GO:0003700);I3LM88(GO:0001077)
GO:0005198	2	2	structural molecule activity	molecular_function	The action of a molecule that contributes to the structural integrity of a complex or its assembly within or outside a cell. [GOC:mah, GOC:vw]	1	GO:0003735	1	I3LTC4	I3LTC4(GO:0003735;GO:0003735)
GO:0044425	2	2	membrane part	cellular_component	Any constituent part of a membrane, a double layer of lipid molecules that encloses all cells, and, in eukaryotes, many organelles; may be a single or double lipid bilayer; also includes associated proteins. [GOC:jl]	6	GO:0016021;GO:0031526;GO:0071556;GO:0030176;GO:0071458;GO:0005789	14	F1SA54;F1S9L2;K7GKY0;F1S568;F1S849;F1S8G9;F1RUH9;F1SJ46;I3LDJ9;F1S5K2;F1SKZ6;F1SED4;F1SP42;E7CXS1	F1SA54(GO:0016021;GO:0016021);F1S9L2(GO:0005789;GO:0005789);K7GKY0(GO:0016021);F1S568(GO:0016021;GO:0016021);F1S849(GO:0016021);F1S8G9(GO:0016021;GO:0016021;GO:0071458;GO:0071556);F1RUH9(GO:0016021);F1SJ46(GO:0016021;GO:0016021);I3LDJ9(GO:0016021;GO:0016021);F1S5K2(GO:0016021;GO:0031526;GO:0031526);F1SKZ6(GO:0016021);F1SED4(GO:0016021;GO:0030176);F1SP42(GO:0016021);E7CXS1(GO:0016021)
GO:0044421	2	2	extracellular region part	cellular_component	Any constituent part of the extracellular region, the space external to the outermost structure of a cell. For cells without external protective or external encapsulating structures this refers to space outside of the plasma membrane. This term covers constituent parts of the host cell environment outside an intracellular parasite. [GOC:jl]	3	GO:1903561;GO:0070062;GO:0005615	5	I3LUD1;K7GKY0;F1S5K2;I3LPC6;Q0Z8R0	I3LUD1(GO:0005615);K7GKY0(GO:0005615;GO:0005615);F1S5K2(GO:0070062);I3LPC6(GO:1903561);Q0Z8R0(GO:0005615)
GO:0044422	2	2	organelle part	cellular_component	Any constituent part of an organelle, an organized structure of distinctive morphology and function. Includes constituent parts of the nucleus, mitochondria, plastids, vacuoles, vesicles, ribosomes and the cytoskeleton, but excludes the plasma membrane. [GOC:jl]	40	GO:0008023;GO:0015934;GO:0005789;GO:0030176;GO:0008024;GO:0016591;GO:0016607;GO:0036064;GO:0016605;GO:0005819;GO:0030660;GO:0097228;GO:0005730;GO:0005813;GO:0005635;GO:0000922;GO:0005654;GO:0071556;GO:0000776;GO:0016514;GO:0071458;GO:0097225;GO:0005675;GO:0031965;GO:0005765;GO:0031966;GO:0001650;GO:0000790;GO:0032580;GO:0032039;GO:0051233;GO:0005930;GO:0070876;GO:0030658;GO:0031080;GO:0005743;GO:…	26	F1SJQ4;F1RFL5;I3LF05;I3L7Q8;F1RWS7;Q06A97;F1SA54;I3LPC6;I3LTC4;F1S7L7;F1RU26;F1S9L2;F1SRJ4;F1SJG5;F1S5K2;F1SED4;F1SLA2;C9E1C9;F1SNA6;F1STY6;F6Q8T7;I3LM88;F1RNN4;F1S8G9;K7GKN2;I3LDJ9	F1SJQ4(GO:0016607);F1RFL5(GO:0005730;GO:0005730;GO:0005730);I3LF05(GO:0005765);I3L7Q8(GO:0005680);F1RWS7(GO:0000922;GO:0005813;GO:0005819;GO:0016591;GO:0016607;GO:0051233);Q06A97(GO:0030658);F1SA54(GO:0032580;GO:0032580);I3LPC6(GO:0005930;GO:0036064;GO:0097225;GO:0097228);I3LTC4(GO:0005743;GO:0005762;GO:0015934);F1S7L7(GO:0000790);F1RU26(GO:0005654);F1S9L2(GO:0001650;GO:0005741;GO:0005743;GO:0005…
GO:0051704	2	2	multi-organism process	biological_process	A biological process which involves another organism of the same or different species. [GOC:jl]	3	GO:0009615;GO:0051607;GO:0043923	5	K7GKN2;F1RWS7;K7GN56;F1SCY2;F1S9L2	K7GKN2(GO:0009615;GO:0051607;GO:0051607;GO:0051607);F1RWS7(GO:0043923);K7GN56(GO:0051607);F1SCY2(GO:0051607);F1S9L2(GO:0009615;GO:0009615;GO:0051607;GO:0051607;GO:0051607)
GO:0043226	2	2	organelle	cellular_component	Organized structure of distinctive morphology and function. Includes the nucleus, mitochondria, plastids, vacuoles, vesicles, ribosomes and the cytoskeleton, and prokaryotic structures such as anammoxosomes and pirellulosomes. Excludes the plasma membrane. [GOC:go_curators]	18	GO:0005856;GO:0005794;GO:0005819;GO:0070062;GO:0005783;GO:0005730;GO:0031410;GO:0005634;GO:0005811;GO:0005777;GO:0005739;GO:0036464;GO:0005929;GO:0097598;GO:1903561;GO:0005694;GO:0000776;GO:0015629	26	F1SJQ4;F1RP31;F1RFL5;I3L7Q8;F1RWS7;Q06A97;F1SA54;I3LPC6;F1S7L7;F1RU26;F1S9L2;F1SRJ4;F1SJG5;F1S5K2;F1SLA2;C9E1C9;P79379;F1SNA6;I3LM88;Q767M0;F1SG36;F1RNN4;F1SUE6;F1SEA5;F1RP50;I3LDJ9	F1SJQ4(GO:0036464);F1RP31(GO:0005634;GO:0005634;GO:0005634);F1RFL5(GO:0005634;GO:0005634;GO:0005730;GO:0005730;GO:0005730);I3L7Q8(GO:0005634);F1RWS7(GO:0005634;GO:0005819;GO:0015629);Q06A97(GO:0005634;GO:0031410);F1SA54(GO:0005794);I3LPC6(GO:0005929;GO:0097598;GO:1903561);F1S7L7(GO:0005634);F1RU26(GO:0005634);F1S9L2(GO:0005739;GO:0005783;GO:0005783;GO:0005811;GO:0005811);F1SRJ4(GO:0000776;GO:0005…
GO:0045202	2	2	synapse	cellular_component	The junction between a nerve fiber of one neuron and another neuron, muscle fiber or glial cell. As the nerve fiber approaches the synapse it enlarges into a specialized structure, the presynaptic nerve ending, which contains mitochondria and synaptic vesicles. At the tip of the nerve ending is the presynaptic membrane; facing it, and separated from it by a minute cleft (the synaptic cleft) is a …	1	GO:0045202	1	Q06A97	Q06A97(GO:0045202)
GO:0016020	2	2	membrane	cellular_component	A lipid bilayer along with all the proteins and protein complexes embedded in it an attached to it. [GOC:dos, GOC:mah, ISBN:0815316194]	12	GO:0030660;GO:0005765;GO:0016020;GO:0031965;GO:0031966;GO:0030658;GO:0005743;GO:0005741;GO:0031526;GO:0005886;GO:0032580;GO:0005789	23	F1RFL5;I3LF05;F1S568;Q06A97;F1SA54;I3LTC4;F1S9L2;K7GKY0;F1S5K2;F1SED4;C9E1C9;F1RUH9;F1S849;F1SP42;I3LM88;F1SUE6;F1SKZ6;F1S8G9;K7GKN2;I3LFY4;F1SJ46;I3LDJ9;E7CXS1	F1RFL5(GO:0016020);I3LF05(GO:0005765);F1S568(GO:0016020);Q06A97(GO:0016020;GO:0030658);F1SA54(GO:0016020;GO:0032580;GO:0032580);I3LTC4(GO:0005743);F1S9L2(GO:0005741;GO:0005743;GO:0005789;GO:0005789);K7GKY0(GO:0016020);F1S5K2(GO:0005743;GO:0016020;GO:0031526;GO:0031526);F1SED4(GO:0016020);C9E1C9(GO:0016020);F1RUH9(GO:0016020);F1S849(GO:0016020);F1SP42(GO:0005886;GO:0005886;GO:0005886;GO:0016020;GO…
GO:0022414	2	2	reproductive process	biological_process	A biological process that directly contributes to the process of producing new individuals by one or two organisms. The new individuals inherit some proportion of their genetic material from the parent or parents. [GOC:dph, GOC:isa_complete]	3	GO:0007283;GO:0007296;GO:0060674	2	F1RU26;F1RNN4	F1RU26(GO:0007296;GO:0060674);F1RNN4(GO:0007283)
GO:0005576	2	2	extracellular region	cellular_component	The space external to the outermost structure of a cell. For cells without external protective or external encapsulating structures this refers to space outside of the plasma membrane. This term covers the host cell environment outside an intracellular parasite. [GOC:go_curators]	1	GO:0005576	2	K7GKY0;Q06A97	K7GKY0(GO:0005576);Q06A97(GO:0005576;GO:0005576)
GO:0016209	2	2	antioxidant activity	molecular_function	Inhibition of the reactions brought about by dioxygen (O2) or peroxides. Usually the antioxidant is effective because it can itself be more easily oxidized than the substance protected. The term is often applied to components that can trap free radicals, thereby breaking the chain reaction that normally leads to extensive biological damage. [ISBN:0198506732]	1	GO:0004784	1	I3LUD1	I3LUD1(GO:0004784;GO:0004784;GO:0004784)
GO:0071840	2	2	cellular component organization or biogenesis	biological_process	A process that results in the biosynthesis of constituent macromolecules, assembly, arrangement of constituent parts, or disassembly of a cellular component. [GOC:mah]	17	GO:0003374;GO:0007010;GO:0060271;GO:0006338;GO:0097345;GO:0000266;GO:0006334;GO:0006335;GO:0051260;GO:0042254;GO:0030036;GO:0031122;GO:0061025;GO:0007296;GO:0016043;GO:0031497;GO:1905515	10	F1S7L7;I3LPC6;F1RU26;F1RNN4;F1SUE6;K7GKN2;F1RFZ6;F1SJG5;I3LDJ9;I3LH80	F1S7L7(GO:0006334;GO:0006335;GO:0031497);I3LPC6(GO:0031122;GO:0060271;GO:0060271;GO:0060271;GO:1905515);F1RU26(GO:0007296);F1RNN4(GO:0060271;GO:0060271;GO:0060271);F1SUE6(GO:0051260);K7GKN2(GO:0000266;GO:0003374;GO:0061025);F1RFZ6(GO:0042254);F1SJG5(GO:0006338);I3LDJ9(GO:0097345);I3LH80(GO:0007010;GO:0016043;GO:0030036)
GO:0009987	2	2	cellular process	biological_process	Any process that is carried out at the cellular level, but not necessarily restricted to a single cell. For example, cell communication occurs among more than one cell, but occurs at the cellular level. [GOC:go_curators, GOC:isa_complete]	74	GO:0018105;GO:0035735;GO:0000266;GO:0006470;GO:0006468;GO:0042073;GO:0061025;GO:0007296;GO:0007165;GO:0031497;GO:0034198;GO:0035556;GO:0035457;GO:0016043;GO:0016180;GO:0007219;GO:0051480;GO:0006486;GO:0019430;GO:0051084;GO:0071357;GO:0051260;GO:0006882;GO:0070979;GO:0006241;GO:0061614;GO:0006364;GO:0006366;GO:0006368;GO:0010501;GO:0031297;GO:0018279;GO:0097359;GO:0010458;GO:0021522;GO:0060271;GO:…	37	I3LPC6;F1RP31;F1RFL5;I3LF05;I3L7Q8;F1RWS7;F1RHJ0;Q06A97;F1SA54;F1RPV8;I3LTC4;F1S7L7;F1RU26;F1SCY2;F1S9L2;F1SJG5;K7GKY0;F1S6I1;F1SED4;C9E1C9;I3LT15;P79379;F1RFZ6;F1SNA6;F1STY6;F6Q8T7;F1RUL8;I3LM88;I3LUD1;F1RNN4;F1SUE6;G9BWQ2;K7GKN2;F1RP50;I3LDJ9;I3LH80;F1SBX8	I3LPC6(GO:0007219;GO:0007224;GO:0021522;GO:0031122;GO:0060271;GO:0060271;GO:0060271;GO:1905515);F1RP31(GO:0006351;GO:0006351);F1RFL5(GO:0010501);I3LF05(GO:0034198);I3L7Q8(GO:0070979);F1RWS7(GO:0006470;GO:0010458;GO:0070940);F1RHJ0(GO:0000154;GO:0031167);Q06A97(GO:0051480);F1SA54(GO:0006486;GO:0033578);F1RPV8(GO:0006165;GO:0006183;GO:0006228;GO:0006241);I3LTC4(GO:0006412);F1S7L7(GO:0006334;GO:0006…
GO:0005215	2	2	transporter activity	molecular_function	Enables the directed movement of substances (such as macromolecules, small molecules, ions) into, out of or within a cell, or between cells. [GOC:ai, GOC:dgf]	1	GO:0030229	1	E7CXS1	E7CXS1(GO:0030229)
GO:0032502	2	2	developmental process	biological_process	A biological process whose specific outcome is the progression of an integrated living unit: an anatomical structure (which may be a subcellular structure, cell, tissue, or organ), or organism over time from an initial condition to a later condition. [GOC:isa_complete]	19	GO:0007507;GO:0021522;GO:0001701;GO:0021591;GO:0007420;GO:0007512;GO:0001942;GO:0060173;GO:0001947;GO:0072675;GO:0060021;GO:0061525;GO:0060674;GO:0001841;GO:0021915;GO:0001843;GO:0060348;GO:0008544;GO:0043367	5	F6Q8T7;K7GKY0;F1RU26;I3LPC6;F1S9L2	F6Q8T7(GO:0007512;GO:0021591);K7GKY0(GO:0001942;GO:0072675);F1RU26(GO:0001701;GO:0060674);I3LPC6(GO:0001841;GO:0001843;GO:0001947;GO:0007420;GO:0007507;GO:0008544;GO:0021522;GO:0021915;GO:0060021;GO:0060173;GO:0060348;GO:0061525);F1S9L2(GO:0043367)
GO:0032501	2	2	multicellular organismal process	biological_process	Any biological process, occurring at the level of a multicellular organism, pertinent to its function. [GOC:curators, GOC:dph, GOC:isa_complete, GOC:tb]	5	GO:0007368;GO:0001701;GO:0009953;GO:0001942;GO:0070986	3	K7GKY0;F1RU26;I3LPC6	K7GKY0(GO:0001942);F1RU26(GO:0001701);I3LPC6(GO:0007368;GO:0009953;GO:0070986)
GO:0098772	2	2	molecular function regulator	molecular_function	A molecular function that modulates the activity of a gene product or complex. Examples include enzyme regulators and channel regulators. [GOC:dos, GOC:pt]	7	GO:0061575;GO:0030414;GO:0005090;GO:0005096;GO:0004866;GO:0004869;GO:0019208	5	I3LT15;K7GKY0;F6Q8T7;Q0Z8R0;F1SED4	I3LT15(GO:0019208);K7GKY0(GO:0004866);F6Q8T7(GO:0061575);Q0Z8R0(GO:0004869;GO:0004869;GO:0004869;GO:0030414);F1SED4(GO:0005090;GO:0005096)
GO:0051179	2	2	localization	biological_process	Any process in which a cell, a substance, or a cellular entity, such as a protein complex or organelle, is transported, tethered to or otherwise maintained in a specific location. In the case of substances, localization may also be achieved via selective degradation. [GOC:ai, GOC:dos]	9	GO:0016973;GO:0032439;GO:0006898;GO:0009306;GO:0006810;GO:0042073;GO:0035735;GO:0015031;GO:0006406	6	F1SJQ4;F1RNN4;K7GKN2;F1SJ46;F1SED4;E7CXS1	F1SJQ4(GO:0006406;GO:0016973);F1RNN4(GO:0035735;GO:0042073;GO:0042073);K7GKN2(GO:0032439);F1SJ46(GO:0006810;GO:0015031);F1SED4(GO:0009306);E7CXS1(GO:0006898)
GO:0022610	2	2	biological adhesion	biological_process	The attachment of a cell or organism to a substrate, another cell, or other organism. Biological adhesion includes intracellular attachment between membrane regions. [GOC:isa_complete]	2	GO:0007155;GO:0007156	1	F1SP42	F1SP42(GO:0007155;GO:0007155;GO:0007156)
GO:0044464	2	2	cell part	cellular_component	Any constituent part of a cell, the basic structural and functional unit of all organisms. [GOC:jl]	63	GO:0008023;GO:0015934;GO:0005783;GO:0016607;GO:0005789;GO:0030176;GO:0036464;GO:0005929;GO:0097598;GO:0008024;GO:0016591;GO:0005622;GO:0032580;GO:0015629;GO:0005856;GO:0036064;GO:0016605;GO:0005819;GO:0030660;GO:0097228;GO:0005730;GO:0031410;GO:0005634;GO:0005635;GO:0005777;GO:0005739;GO:0000922;GO:0005654;GO:0071556;GO:0070876;GO:0043005;GO:0016514;GO:0071458;GO:0048471;GO:0005694;GO:0005794;GO:…	40	F1SJQ4;F1RP31;F1RFL5;K7GKY0;F1RXZ6;I3L7Q8;F1RWS7;Q06A97;F1SA54;I3LPC6;I3LTC4;F1S7L7;F1RU26;F1S9L2;F1SRJ4;F1SJG5;I3LF05;F1S6I1;F1S5K2;F1SED4;F1SLA2;C9E1C9;I3LT15;P79379;F1SNA6;F1STY6;F6Q8T7;F1SP42;I3LM88;Q767M0;F1SG36;I3LUD1;F1RNN4;F1SUE6;G9BWQ2;F1S8G9;K7GKN2;F1SEA5;F1RP50;I3LDJ9	F1SJQ4(GO:0016607;GO:0036464);F1RP31(GO:0005634;GO:0005634;GO:0005634);F1RFL5(GO:0005634;GO:0005634;GO:0005730;GO:0005730;GO:0005730;GO:0005737;GO:0005829;GO:0005829);K7GKY0(GO:0009986);F1RXZ6(GO:0005737);I3L7Q8(GO:0005634;GO:0005680);F1RWS7(GO:0000922;GO:0005634;GO:0005813;GO:0005819;GO:0015629;GO:0016591;GO:0016607;GO:0030496;GO:0051233);Q06A97(GO:0005634;GO:0005737;GO:0005737;GO:0005829;GO:003…
GO:0060089	2	2	molecular transducer activity	molecular_function	A compound molecular function in which an effector function is controlled by one or more regulatory components. [GOC:dos, GOC:pdt]	2	GO:0004693;GO:0030229	2	C9E1C9;E7CXS1	C9E1C9(GO:0004693;GO:0004693);E7CXS1(GO:0030229)
GO:0098754	2	2	detoxification	biological_process	Any process that reduces or removes the toxicity of a toxic substance. These may include transport of the toxic substance away from sensitive areas and to compartments or complexes whose purpose is sequestration of the toxic substance. [GOC:dos]	2	GO:0019430;GO:0010273	2	P79379;I3LUD1	P79379(GO:0010273);I3LUD1(GO:0019430)
GO:0005488	2	2	binding	molecular_function	The selective, non-covalent, often stoichiometric, interaction of a molecule with one or more specific sites on another molecule. [GOC:ceb, GOC:mah, ISBN:0198506732]	49	GO:0042393;GO:0017048;GO:0031625;GO:0001164;GO:0051020;GO:0008270;GO:0003676;GO:0003677;GO:0050431;GO:0030957;GO:0043565;GO:0001223;GO:0097322;GO:0003682;GO:0051082;GO:0000166;GO:0003779;GO:0042802;GO:0005509;GO:0002020;GO:0046872;GO:0005090;GO:0005524;GO:0005525;GO:0001096;GO:0015631;GO:0030332;GO:0046982;GO:0008017;GO:0008134;GO:0070087;GO:0019901;GO:0019903;GO:0019902;GO:0000978;GO:0043621;GO:…	34	F1SJQ4;F1RP31;F1RFL5;K7GKY0;I3L7Q8;F1RWS7;Q06A97;Q0Z8R0;I3LTC4;F1S7L7;F1RU26;F1S9L2;F1SJG5;F1SED4;F1SLA2;C9E1C9;I3LT15;P79379;F6Q8T7;F1SP42;I3LM88;Q767M0;F1SG36;I3LUD1;F1RNN4;F1SUE6;G9BWQ2;K7GKN2;F1SEA5;F1RP50;I3LFY4;I3LH80;F1SBX8;E7CXS1	F1SJQ4(GO:0003676;GO:0003723;GO:0003723;GO:0003723);F1RP31(GO:0000977;GO:0003677;GO:0003677;GO:0003677;GO:0046983);F1RFL5(GO:0000166;GO:0003676;GO:0003723;GO:0003723;GO:0005524;GO:0005524);K7GKY0(GO:0050431);I3L7Q8(GO:0019903);F1RWS7(GO:0001096;GO:0030957);Q06A97(GO:0005509;GO:0005509;GO:0046872);Q0Z8R0(GO:0002020);I3LTC4(GO:0046872);F1S7L7(GO:0042802;GO:0070087);F1RU26(GO:0000977;GO:0000978;GO:0…
GO:0003824	2	2	catalytic activity	molecular_function	Catalysis of a biochemical reaction at physiological temperatures. In biologically catalyzed reactions, the reactants are known as substrates, and the catalysts are naturally occurring macromolecular substances known as enzymes. Enzymes possess specific binding sites for substrates, and are usually composed wholly or largely of protein, but RNA that has catalytic activity (ribozyme) is often also…	31	GO:0033897;GO:0004252;GO:0016887;GO:0008353;GO:0004693;GO:0016866;GO:0016491;GO:0008649;GO:0008424;GO:0008420;GO:0004674;GO:0016740;GO:0004672;GO:0004190;GO:0003980;GO:0016787;GO:0004649;GO:0016301;GO:0003924;GO:0004004;GO:0004386;GO:0003824;GO:0004784;GO:0004842;GO:0008094;GO:0016818;GO:0000179;GO:0042500;GO:0016817;GO:0004550;GO:0016757	23	F1RFL5;F1S568;F1RWS7;F1RHJ0;F1SA54;F1RPV8;F1SJG5;F1S9L2;I3L7C2;F1RP50;F1S5K2;C9E1C9;I3LT15;F1SDW4;F6Q8T7;I3LM88;F1SBX8;F1SUE6;G9BWQ2;F1S8G9;K7GKN2;F1S6I1;I3LUD1	F1RFL5(GO:0004004;GO:0004386;GO:0016787);F1S568(GO:0016757);F1RWS7(GO:0008420;GO:0008420);F1RHJ0(GO:0000179;GO:0008649);F1SA54(GO:0008424;GO:0008424;GO:0016740;GO:0016757);F1RPV8(GO:0004550);F1SJG5(GO:0016817;GO:0016887);F1S9L2(GO:0003824);I3L7C2(GO:0016866);F1RP50(GO:0003980;GO:0003980);F1S5K2(GO:0003824);C9E1C9(GO:0004672;GO:0004674;GO:0004693;GO:0004693;GO:0008353;GO:0008353;GO:0008353);I3LT15…
GO:0050896	2	2	response to stimulus	biological_process	Any process that results in a change in state or activity of a cell or an organism (in terms of movement, secretion, enzyme production, gene expression, etc.) as a result of a stimulus. The process begins with detection of the stimulus and ends with a change in state or activity or the cell or organism. [GOC:ai, GOC:bf]	16	GO:0006974;GO:0031668;GO:0071294;GO:0010212;GO:0051607;GO:0030968;GO:0006281;GO:0071345;GO:0009615;GO:0045087;GO:0034198;GO:0006289;GO:0051592;GO:0071712;GO:0071357;GO:0035457	11	C9E1C9;P79379;F1RU26;K7GKN2;F1SCY2;F1S9L2;K7GN56;F1SNA6;F1RP50;I3LF05;F6Q8T7	C9E1C9(GO:0071345);P79379(GO:0071294);F1RU26(GO:0031668);K7GKN2(GO:0009615;GO:0045087;GO:0051607;GO:0051607;GO:0051607;GO:0071357);F1SCY2(GO:0035457;GO:0051607);F1S9L2(GO:0009615;GO:0009615;GO:0051607;GO:0051607;GO:0051607);K7GN56(GO:0051607);F1SNA6(GO:0006281;GO:0006281;GO:0006974;GO:0006974;GO:0010212);F1RP50(GO:0030968;GO:0071712);I3LF05(GO:0034198);F6Q8T7(GO:0006281;GO:0006289;GO:0051592)
GO:0031975	3	3	envelope	cellular_component	A multilayered structure surrounding all or part of a cell; encompasses one or more lipid bilayers, and may include a cell wall layer; also includes the space between layers. [GOC:mah, GOC:pz]	2	GO:0005740;GO:0005635	1	I3LDJ9	I3LDJ9(GO:0005635;GO:0005740)
GO:0001775	3	3	cell activation	biological_process	A change in the morphology or behavior of a cell resulting from exposure to an activating factor such as a cellular or soluble ligand. [GOC:mgi_curators]	2	GO:0043367;GO:0035710	1	F1S9L2	F1S9L2(GO:0035710;GO:0043367)
GO:1901363	3	3	heterocyclic compound binding	molecular_function	Interacting selectively and non-covalently with heterocyclic compound. [GOC:TermGenie]	14	GO:0044212;GO:0097322;GO:0001164;GO:0043565;GO:0000166;GO:0017069;GO:0000977;GO:0003676;GO:0003677;GO:0003723;GO:0000978;GO:0000979;GO:0005524;GO:0005525	15	F1SLA2;I3LT15;C9E1C9;F1SJQ4;F1RP31;F1SG36;F1RU26;F1SJG5;G9BWQ2;F1RFL5;K7GKN2;F1SEA5;I3LFY4;F1SBX8;I3LM88	F1SLA2(GO:0001164;GO:0003677);I3LT15(GO:0005524);C9E1C9(GO:0000166;GO:0000979;GO:0003677;GO:0005524;GO:0005524;GO:0017069;GO:0044212;GO:0044212;GO:0097322);F1SJQ4(GO:0003676;GO:0003723;GO:0003723;GO:0003723);F1RP31(GO:0000977;GO:0003677;GO:0003677;GO:0003677);F1SG36(GO:0043565);F1RU26(GO:0000977;GO:0000978;GO:0003677;GO:0003677);F1SJG5(GO:0005524);G9BWQ2(GO:0000166;GO:0005524;GO:0005524);F1RFL5(G…
GO:0007155	3	3	cell adhesion	biological_process	The attachment of a cell, either to another cell or to an underlying substrate such as the extracellular matrix, via cell adhesion molecules. [GOC:hb, GOC:pf]	2	GO:0007155;GO:0007156	1	F1SP42	F1SP42(GO:0007155;GO:0007155;GO:0007156)
GO:0007154	3	3	cell communication	biological_process	Any process that mediates interactions between a cell and its surroundings. Encompasses interactions such as signaling or attachment between one cell and another cell, between a cell and an extracellular matrix, or between a cell and any other aspect of its environment. [GOC:mah]	2	GO:0031668;GO:0034198	2	I3LF05;F1RU26	I3LF05(GO:0034198);F1RU26(GO:0031668)
GO:0004784	3	5	superoxide dismutase activity	molecular_function	Catalysis of the reaction: 2 superoxide + 2 H+ = O2 + hydrogen peroxide. [EC:1.15.1.1, GOC:vw, PMID:15064408]	1	GO:0004784	1	I3LUD1	I3LUD1(GO:0004784;GO:0004784;GO:0004784)
GO:0044459	3	3	plasma membrane part	cellular_component	Any constituent part of the plasma membrane, the membrane surrounding a cell that separates the cell from its external environment. It consists of a phospholipid bilayer and associated proteins. [GOC:jl]	1	GO:0031526	1	F1S5K2	F1S5K2(GO:0031526;GO:0031526)
GO:0006949	3	4	syncytium formation	biological_process	The formation of a syncytium, a mass of cytoplasm containing several nuclei enclosed within a single plasma membrane. Syncytia are normally derived from single cells that fuse or fail to complete cell division. [ISBN:0198506732]	1	GO:0072675	1	K7GKY0	K7GKY0(GO:0072675)
GO:0044085	3	3	cellular component biogenesis	biological_process	A process that results in the biosynthesis of constituent macromolecules, assembly, and arrangement of constituent parts of a cellular component. Includes biosynthesis of constituent macromolecules, and those macromolecular modifications that are involved in synthesis or assembly of the cellular component. [GOC:jl, GOC:mah]	1	GO:0042254	1	F1RFZ6	F1RFZ6(GO:0042254)
GO:0031224	3	3	intrinsic component of membrane	cellular_component	The component of a membrane consisting of the gene products having some covalently attached portion, for example part of a peptide sequence or some other covalently attached group such as a GPI anchor, which spans or is embedded in one or both leaflets of the membrane. [GOC:mah]	4	GO:0071458;GO:0016021;GO:0030176;GO:0071556	13	F1SA54;K7GKY0;F1S568;F1S849;F1S8G9;F1RUH9;F1SJ46;I3LDJ9;F1S5K2;F1SKZ6;F1SED4;F1SP42;E7CXS1	F1SA54(GO:0016021;GO:0016021);K7GKY0(GO:0016021);F1S568(GO:0016021;GO:0016021);F1S849(GO:0016021);F1S8G9(GO:0016021;GO:0016021;GO:0071458;GO:0071556);F1RUH9(GO:0016021);F1SJ46(GO:0016021;GO:0016021);I3LDJ9(GO:0016021;GO:0016021);F1S5K2(GO:0016021);F1SKZ6(GO:0016021);F1SED4(GO:0016021;GO:0030176);F1SP42(GO:0016021);E7CXS1(GO:0016021)
GO:0140098	3	3	catalytic activity, acting on RNA	molecular_function	Catalytic activity that acts to modify RNA. [GOC:pdt]	4	GO:0033897;GO:0000179;GO:0008649;GO:0004004	3	F1RFL5;F1SBX8;F1RHJ0	F1RFL5(GO:0004004);F1SBX8(GO:0033897);F1RHJ0(GO:0000179;GO:0008649)
GO:0140096	3	3	catalytic activity, acting on a protein	molecular_function	Catalytic activity that acts to modify a protein. [GOC:pdt]	10	GO:0004252;GO:0008424;GO:0042500;GO:0008420;GO:0004674;GO:0004190;GO:0004672;GO:0004693;GO:0008353;GO:0004842	9	C9E1C9;I3LT15;F1SUE6;G9BWQ2;F1S8G9;F1RWS7;F1S6I1;F1SA54;F6Q8T7	C9E1C9(GO:0004672;GO:0004674;GO:0004693;GO:0004693;GO:0008353;GO:0008353;GO:0008353);I3LT15(GO:0004672;GO:0004674);F1SUE6(GO:0004252;GO:0004252);G9BWQ2(GO:0004672;GO:0004674;GO:0004674;GO:0004674);F1S8G9(GO:0004190;GO:0042500);F1RWS7(GO:0008420;GO:0008420);F1S6I1(GO:0004842);F1SA54(GO:0008424;GO:0008424);F6Q8T7(GO:0008353)
GO:0005622	3	3	intracellular	cellular_component	The living contents of a cell; the matter contained within (but not including) the plasma membrane, usually taken to exclude large vacuoles and masses of secretory or ingested material. In eukaryotes it includes the nucleus and cytoplasm. [ISBN:0198506732]	1	GO:0005622	1	G9BWQ2	G9BWQ2(GO:0005622)
GO:0019725	3	5	cellular homeostasis	biological_process	Any process involved in the maintenance of an internal steady state at the level of the cell. [GOC:isa_complete, GOC:jl, ISBN:0395825172]	2	GO:0051480;GO:0006882	2	P79379;Q06A97	P79379(GO:0006882);Q06A97(GO:0051480)
GO:0030234	3	3	enzyme regulator activity	molecular_function	Binds to and modulates the activity of an enzyme. [GOC:dph, GOC:mah, GOC:tb]	7	GO:0061575;GO:0030414;GO:0005090;GO:0005096;GO:0004866;GO:0004869;GO:0019208	5	I3LT15;K7GKY0;F6Q8T7;Q0Z8R0;F1SED4	I3LT15(GO:0019208);K7GKY0(GO:0004866);F6Q8T7(GO:0061575);Q0Z8R0(GO:0004869;GO:0004869;GO:0004869;GO:0030414);F1SED4(GO:0005090;GO:0005096)
GO:0044424	3	3	intracellular part	cellular_component	Any constituent part of the living contents of a cell; the matter contained within (but not including) the plasma membrane, usually taken to exclude large vacuoles and masses of secretory or ingested material. In eukaryotes it includes the nucleus and cytoplasm. [GOC:jl]	54	GO:0008023;GO:0015934;GO:0005783;GO:0016607;GO:0005789;GO:0030176;GO:0036464;GO:0097598;GO:0008024;GO:0016591;GO:0032580;GO:0015629;GO:0005856;GO:0036064;GO:0016605;GO:0005819;GO:0030660;GO:0005730;GO:0031410;GO:0005634;GO:0005635;GO:0005777;GO:0005739;GO:0000922;GO:0005654;GO:0071556;GO:0070876;GO:0016514;GO:0071458;GO:0048471;GO:0005694;GO:0005794;GO:0005675;GO:0031965;GO:0005765;GO:0031966;GO:…	37	F1SJQ4;F1RP31;F1RFL5;I3LF05;F1RXZ6;I3L7Q8;F1RWS7;Q06A97;F1SA54;I3LPC6;I3LTC4;F1S7L7;F1RU26;F1S9L2;F1SRJ4;F1SJG5;F1S6I1;F1S5K2;F1SED4;F1SLA2;C9E1C9;I3LT15;P79379;F1SNA6;F1STY6;F6Q8T7;I3LM88;Q767M0;F1SG36;I3LUD1;F1RNN4;F1SUE6;F1S8G9;K7GKN2;F1SEA5;F1RP50;I3LDJ9	F1SJQ4(GO:0016607;GO:0036464);F1RP31(GO:0005634;GO:0005634;GO:0005634);F1RFL5(GO:0005634;GO:0005634;GO:0005730;GO:0005730;GO:0005730;GO:0005737;GO:0005829;GO:0005829);I3LF05(GO:0005765);F1RXZ6(GO:0005737);I3L7Q8(GO:0005634;GO:0005680);F1RWS7(GO:0000922;GO:0005634;GO:0005813;GO:0005819;GO:0015629;GO:0016591;GO:0016607;GO:0051233);Q06A97(GO:0005634;GO:0005737;GO:0005737;GO:0005829;GO:0030658;GO:003…
GO:0005515	3	3	protein binding	molecular_function	Interacting selectively and non-covalently with any protein or protein complex (a complex of two or more proteins that may include other nonprotein molecules). [GOC:go_curators]	28	GO:0042393;GO:0017048;GO:0051020;GO:0050431;GO:0030957;GO:0008017;GO:0051082;GO:0003779;GO:0002020;GO:0008134;GO:0042802;GO:0001096;GO:0015631;GO:0030332;GO:0005090;GO:0070087;GO:0019901;GO:0019903;GO:0019902;GO:0043621;GO:0031625;GO:0047485;GO:0001223;GO:0045296;GO:0005515;GO:0035612;GO:0046983;GO:0046982	23	Q0Z8R0;F1RP31;K7GKY0;I3L7Q8;F1RWS7;F1S7L7;F1S9L2;F1SJG5;F1SED4;F1SLA2;C9E1C9;I3LT15;F6Q8T7;I3LM88;Q767M0;F1SG36;F1RNN4;F1SUE6;G9BWQ2;K7GKN2;F1SEA5;F1RP50;I3LH80	Q0Z8R0(GO:0002020);F1RP31(GO:0046983);K7GKY0(GO:0050431);I3L7Q8(GO:0019903);F1RWS7(GO:0001096;GO:0030957);F1S7L7(GO:0042802;GO:0070087);F1S9L2(GO:0043621);F1SJG5(GO:0042393);F1SED4(GO:0005090;GO:0051020);F1SLA2(GO:0042393);C9E1C9(GO:0001223;GO:0008134;GO:0019901;GO:0030332);I3LT15(GO:0035612);F6Q8T7(GO:0047485);I3LM88(GO:0031625);Q767M0(GO:0003779;GO:0019902;GO:0046983);F1SG36(GO:0046982);F1RNN4(…
GO:0097367	3	3	carbohydrate derivative binding	molecular_function	Interacting selectively and non-covalently with a carbohydrate derivative. [GOC:pr]	2	GO:0005524;GO:0005525	8	C9E1C9;I3LT15;K7GKN2;G9BWQ2;F1RFL5;F1SJG5;I3LFY4;I3LM88	C9E1C9(GO:0005524;GO:0005524);I3LT15(GO:0005524);K7GKN2(GO:0005525;GO:0005525);G9BWQ2(GO:0005524;GO:0005524);F1RFL5(GO:0005524;GO:0005524);F1SJG5(GO:0005524);I3LFY4(GO:0005524);I3LM88(GO:0005524)
GO:0002252	3	3	immune effector process	biological_process	Any process of the immune system that can potentially contribute to an immune response. [GO_REF:0000022, GOC:add, GOC:mtg_15nov05, ISBN:0781735149]	1	GO:0051607	4	K7GN56;K7GKN2;F1SCY2;F1S9L2	K7GN56(GO:0051607);K7GKN2(GO:0051607;GO:0051607;GO:0051607);F1SCY2(GO:0051607);F1S9L2(GO:0051607;GO:0051607;GO:0051607)
GO:0055114	3	3	oxidation-reduction process	biological_process	A metabolic process that results in the removal or addition of one or more electrons to or from a substance, with or without the concomitant removal or addition of a proton or protons. [GOC:dhl, GOC:ecd, GOC:jh2, GOC:jid, GOC:mlg, GOC:rph]	1	GO:0055114	1	I3LUD1	I3LUD1(GO:0055114;GO:0055114)
GO:0051707	3	5	response to other organism	biological_process	Any process that results in a change in state or activity of a cell or an organism (in terms of movement, secretion, enzyme production, gene expression, etc.) as a result of a stimulus from another living organism. [GOC:ai]	2	GO:0009615;GO:0051607	4	K7GKN2;K7GN56;F1SCY2;F1S9L2	K7GKN2(GO:0009615;GO:0051607;GO:0051607;GO:0051607);K7GN56(GO:0051607);F1SCY2(GO:0051607);F1S9L2(GO:0009615;GO:0009615;GO:0051607;GO:0051607;GO:0051607)
GO:0043229	3	4	intracellular organelle	cellular_component	Organized structure of distinctive morphology and function, occurring within the cell. Includes the nucleus, mitochondria, plastids, vacuoles, vesicles, ribosomes and the cytoskeleton. Excludes the plasma membrane. [GOC:go_curators]	15	GO:0005856;GO:0005794;GO:0005819;GO:0005783;GO:0005730;GO:0031410;GO:0005634;GO:0005811;GO:0005777;GO:0005739;GO:0036464;GO:0097598;GO:0005694;GO:0000776;GO:0015629	24	F1SJQ4;F1RP31;F1RFL5;I3L7Q8;F1RWS7;Q06A97;F1SA54;I3LPC6;F1S7L7;F1RU26;F1S9L2;F1SRJ4;F1SJG5;F1SLA2;C9E1C9;P79379;F1SNA6;I3LM88;Q767M0;F1SG36;F1SUE6;F1SEA5;F1RP50;I3LDJ9	F1SJQ4(GO:0036464);F1RP31(GO:0005634;GO:0005634;GO:0005634);F1RFL5(GO:0005634;GO:0005634;GO:0005730;GO:0005730;GO:0005730);I3L7Q8(GO:0005634);F1RWS7(GO:0005634;GO:0005819;GO:0015629);Q06A97(GO:0005634;GO:0031410);F1SA54(GO:0005794);I3LPC6(GO:0097598);F1S7L7(GO:0005634);F1RU26(GO:0005634);F1S9L2(GO:0005739;GO:0005783;GO:0005783;GO:0005811;GO:0005811);F1SRJ4(GO:0000776;GO:0005634);F1SJG5(GO:0005634…
GO:0043228	3	3	non-membrane-bounded organelle	cellular_component	Organized structure of distinctive morphology and function, not bounded by a lipid bilayer membrane. Includes ribosomes, the cytoskeleton and chromosomes. [GOC:go_curators]	8	GO:0005856;GO:0005819;GO:0015629;GO:0005730;GO:0005811;GO:0036464;GO:0005694;GO:0000776	7	C9E1C9;F1SJQ4;F1RFL5;F1S9L2;F1SRJ4;F1RWS7;Q767M0	C9E1C9(GO:0005694;GO:0036464;GO:0036464);F1SJQ4(GO:0036464);F1RFL5(GO:0005730;GO:0005730;GO:0005730);F1S9L2(GO:0005811;GO:0005811);F1SRJ4(GO:0000776);F1RWS7(GO:0005819;GO:0015629);Q767M0(GO:0005856;GO:0005856)
GO:0043227	3	3	membrane-bounded organelle	cellular_component	Organized structure of distinctive morphology and function, bounded by a single or double lipid bilayer membrane. Includes the nucleus, mitochondria, plastids, vacuoles, and vesicles. Excludes the plasma membrane. [GOC:go_curators]	9	GO:0005794;GO:0005783;GO:0031410;GO:0005634;GO:0005777;GO:0005739;GO:0097598;GO:1903561;GO:0070062	23	I3LPC6;F1RP31;F1SRJ4;I3L7Q8;F1RWS7;Q06A97;F1SA54;F1S7L7;F1RU26;F1S9L2;F1RFL5;F1SJG5;F1S5K2;F1SLA2;C9E1C9;P79379;F1SNA6;I3LM88;F1SG36;F1SUE6;F1SEA5;F1RP50;I3LDJ9	I3LPC6(GO:0097598;GO:1903561);F1RP31(GO:0005634;GO:0005634;GO:0005634);F1SRJ4(GO:0005634);I3L7Q8(GO:0005634);F1RWS7(GO:0005634);Q06A97(GO:0005634;GO:0031410);F1SA54(GO:0005794);F1S7L7(GO:0005634);F1RU26(GO:0005634);F1S9L2(GO:0005739;GO:0005783;GO:0005783);F1RFL5(GO:0005634;GO:0005634);F1SJG5(GO:0005634);F1S5K2(GO:0070062);F1SLA2(GO:0005634);C9E1C9(GO:0005634);P79379(GO:0005634);F1SNA6(GO:0005634;…
GO:0045321	3	4	leukocyte activation	biological_process	A change in morphology and behavior of a leukocyte resulting from exposure to a specific antigen, mitogen, cytokine, cellular ligand, or soluble factor. [GOC:add]	2	GO:0043367;GO:0035710	1	F1S9L2	F1S9L2(GO:0035710;GO:0043367)
GO:1902494	3	3	catalytic complex	cellular_component	A protein complex which is capable of catalytic activity. [GOC:bhm, GOC:TermGenie, PMID:8077207]	6	GO:0008024;GO:0016514;GO:0005675;GO:0016591;GO:0031462;GO:0005680	6	C9E1C9;F1RWS7;I3L7Q8;F1SJG5;F1S6I1;F6Q8T7	C9E1C9(GO:0008024;GO:0008024;GO:0008024);F1RWS7(GO:0016591);I3L7Q8(GO:0005680);F1SJG5(GO:0016514);F1S6I1(GO:0031462);F6Q8T7(GO:0005675;GO:0005675;GO:0005675)
GO:0006807	3	3	nitrogen compound metabolic process	biological_process	The chemical reactions and pathways involving organic or inorganic compounds that contain nitrogen. [CHEBI:51143, GOC:go_curators, GOC:jl, ISBN:0198506732]	34	GO:0018105;GO:0006470;GO:0016180;GO:0006486;GO:0016567;GO:0006228;GO:0006241;GO:0061614;GO:0006364;GO:0006366;GO:0031293;GO:0006368;GO:0010501;GO:0031297;GO:0018279;GO:0097359;GO:0006468;GO:0006281;GO:0006289;GO:0031167;GO:0006508;GO:0016485;GO:0006183;GO:0090502;GO:0070940;GO:0000154;GO:0030490;GO:0070816;GO:0070979;GO:0071712;GO:0006351;GO:0006165;GO:0033578;GO:0006412	23	I3LPC6;F1RP31;F1RFL5;I3L7Q8;F1RWS7;F1RHJ0;F1SA54;F1RPV8;I3LTC4;F1RU26;F1RP50;C9E1C9;I3LT15;F1RFZ6;F1SNA6;F1STY6;F6Q8T7;I3LM88;F1SBX8;F1SUE6;G9BWQ2;F1S8G9;F1S6I1	I3LPC6(GO:0016485);F1RP31(GO:0006351;GO:0006351);F1RFL5(GO:0010501);I3L7Q8(GO:0070979);F1RWS7(GO:0006470;GO:0070940);F1RHJ0(GO:0000154;GO:0031167);F1SA54(GO:0006486;GO:0033578);F1RPV8(GO:0006165;GO:0006183;GO:0006228;GO:0006241);I3LTC4(GO:0006412);F1RU26(GO:0061614);F1RP50(GO:0006486;GO:0018279;GO:0071712;GO:0097359);C9E1C9(GO:0006368;GO:0006468;GO:0006468;GO:0031297;GO:0070816);I3LT15(GO:0006468…
GO:0061687	3	3	detoxification of inorganic compound	biological_process	Any process that reduces or removes the toxicity of inorganic compounds. These include transport of such compounds away from sensitive areas and to compartments or complexes whose purpose is sequestration of inorganic compounds. [GOC:vw]	1	GO:0010273	1	P79379	P79379(GO:0010273)
GO:0043167	3	3	ion binding	molecular_function	Interacting selectively and non-covalently with ions, charged atoms or groups of atoms. [GOC:jl]	6	GO:0046872;GO:0005525;GO:0005509;GO:0005507;GO:0005524;GO:0008270	15	F1SLA2;I3LTC4;C9E1C9;I3LT15;P79379;I3LUD1;F1SJG5;G9BWQ2;F1RFL5;K7GKN2;Q06A97;I3LFY4;I3LM88;F1SP42;E7CXS1	F1SLA2(GO:0046872);I3LTC4(GO:0046872);C9E1C9(GO:0005524;GO:0005524);I3LT15(GO:0005524);P79379(GO:0008270;GO:0046872;GO:0046872;GO:0046872);I3LUD1(GO:0005507;GO:0008270;GO:0046872;GO:0046872);F1SJG5(GO:0005524);G9BWQ2(GO:0005524;GO:0005524);F1RFL5(GO:0005524;GO:0005524);K7GKN2(GO:0005525;GO:0005525);Q06A97(GO:0005509;GO:0005509;GO:0046872);I3LFY4(GO:0005524);I3LM88(GO:0005524;GO:0008270);F1SP42(GO…
GO:0097472	3	7	cyclin-dependent protein kinase activity	molecular_function	Catalysis of the phosphorylation of an amino acid residue in a protein, usually according to the reaction: a protein + ATP = a phosphoprotein + ADP. This reaction requires the binding of a regulatory cyclin subunit and full activity requires stimulatory phosphorylation by a CDK-activating kinase (CAK). [GOC:pr]	1	GO:0004693	1	C9E1C9	C9E1C9(GO:0004693;GO:0004693)
GO:0007275	3	4	multicellular organism development	biological_process	The biological process whose specific outcome is the progression of a multicellular organism over time from an initial condition (e.g. a zygote or a young adult) to a later condition (e.g. a multicellular animal or an aged adult). [GOC:dph, GOC:ems, GOC:isa_complete, GOC:tb]	1	GO:0001701	1	F1RU26	F1RU26(GO:0001701)
GO:0048609	3	3	multicellular organismal reproductive process	biological_process	The process, occurring above the cellular level, that is pertinent to the reproductive function of a multicellular organism. This includes the integrated processes at the level of tissues and organs. [GOC:dph, GOC:jid, GOC:tb]	1	GO:0007283	1	F1RNN4	F1RNN4(GO:0007283)
GO:0009058	3	3	biosynthetic process	biological_process	The chemical reactions and pathways resulting in the formation of substances; typically the energy-requiring part of metabolism in which simpler substances are transformed into more complex ones. [GOC:curators, ISBN:0198547684]	8	GO:0006228;GO:0006241;GO:0061614;GO:0006351;GO:0006366;GO:0006368;GO:0006412;GO:0006183	7	F1RPV8;I3LTC4;C9E1C9;F1RP31;F1RU26;F6Q8T7;I3LM88	F1RPV8(GO:0006183;GO:0006228;GO:0006241);I3LTC4(GO:0006412);C9E1C9(GO:0006368);F1RP31(GO:0006351;GO:0006351);F1RU26(GO:0061614);F6Q8T7(GO:0006366);I3LM88(GO:0006366)
GO:0009056	3	3	catabolic process	biological_process	The chemical reactions and pathways resulting in the breakdown of substances, including the breakdown of carbon compounds with the liberation of energy for use by the cell or organism. [ISBN:0198547684]	1	GO:0071712	1	F1RP50	F1RP50(GO:0071712)
GO:0044281	3	3	small molecule metabolic process	biological_process	The chemical reactions and pathways involving small molecules, any low molecular weight, monomeric, non-encoded molecule. [GOC:curators, GOC:pde, GOC:vw]	4	GO:0006228;GO:0006241;GO:0006183;GO:0006165	1	F1RPV8	F1RPV8(GO:0006165;GO:0006183;GO:0006228;GO:0006241)
GO:0022412	3	3	cellular process involved in reproduction in multicellular organism	biological_process	A process, occurring at the cellular level, that is involved in the reproductive function of a multicellular organism. [GOC:isa_complete]	1	GO:0007296	1	F1RU26	F1RU26(GO:0007296)
GO:0016787	3	3	hydrolase activity	molecular_function	Catalysis of the hydrolysis of various bonds, e.g. C-O, C-N, C-C, phosphoric anhydride bonds, etc. Hydrolase is the systematic name for any enzyme of EC class 3. [ISBN:0198506732]	14	GO:0033897;GO:0004252;GO:0016818;GO:0008094;GO:0003924;GO:0016787;GO:0008420;GO:0016817;GO:0004004;GO:0004386;GO:0004649;GO:0004190;GO:0016887;GO:0042500	10	F1RFL5;F1SDW4;F1SBX8;F1SUE6;F1RWS7;F1S8G9;K7GKN2;F1SJG5;F6Q8T7;I3LM88	F1RFL5(GO:0004004;GO:0004386;GO:0016787);F1SDW4(GO:0004649);F1SBX8(GO:0033897);F1SUE6(GO:0004252;GO:0004252);F1RWS7(GO:0008420;GO:0008420);F1S8G9(GO:0004190;GO:0042500);K7GKN2(GO:0003924;GO:0003924;GO:0003924);F1SJG5(GO:0016817;GO:0016887);F6Q8T7(GO:0008094);I3LM88(GO:0016818;GO:0016887)
GO:0009607	3	3	response to biotic stimulus	biological_process	Any process that results in a change in state or activity of a cell or an organism (in terms of movement, secretion, enzyme production, gene expression, etc.) as a result of a biotic stimulus, a stimulus caused or produced by a living organism. [GOC:hb]	2	GO:0009615;GO:0051607	4	K7GKN2;K7GN56;F1SCY2;F1S9L2	K7GKN2(GO:0009615;GO:0051607;GO:0051607;GO:0051607);K7GN56(GO:0051607);F1SCY2(GO:0051607);F1S9L2(GO:0009615;GO:0009615;GO:0051607;GO:0051607;GO:0051607)
GO:0009605	3	3	response to external stimulus	biological_process	Any process that results in a change in state or activity of a cell or an organism (in terms of movement, secretion, enzyme production, gene expression, etc.) as a result of an external stimulus. [GOC:hb]	4	GO:0009615;GO:0031668;GO:0051607;GO:0034198	6	I3LF05;F1RU26;K7GN56;F1SCY2;F1S9L2;K7GKN2	I3LF05(GO:0034198);F1RU26(GO:0031668);K7GN56(GO:0051607);F1SCY2(GO:0051607);F1S9L2(GO:0009615;GO:0009615;GO:0051607;GO:0051607;GO:0051607);K7GKN2(GO:0009615;GO:0051607;GO:0051607;GO:0051607)
GO:0022404	3	3	molting cycle process	biological_process	A multicellular organismal process involved in the periodic casting off and regeneration of an outer covering of cuticle, feathers, hair, horns, skin. [GOC:isa_complete]	1	GO:0001942	1	K7GKY0	K7GKY0(GO:0001942)
GO:0022402	3	3	cell cycle process	biological_process	The cellular process that ensures successive accurate and complete genome replication and chromosome segregation. [GOC:isa_complete, GOC:mtg_cell_cycle]	1	GO:0010458	1	F1RWS7	F1RWS7(GO:0010458)
GO:0070085	3	3	glycosylation	biological_process	The covalent attachment and further modification of carbohydrate residues to a substrate molecule. [GOC:hjd, GOC:mah]	4	GO:0033578;GO:0018279;GO:0006486;GO:0036071	2	F1SA54;F1RP50	F1SA54(GO:0006486;GO:0033578;GO:0036071);F1RP50(GO:0006486;GO:0018279)
GO:0032259	3	3	methylation	biological_process	The process in which a methyl group is covalently attached to a molecule. [GOC:mah]	2	GO:0032259;GO:0031167	1	F1RHJ0	F1RHJ0(GO:0031167;GO:0032259)
GO:0007165	3	5	signal transduction	biological_process	The cellular process in which a signal is conveyed to trigger a change in the activity or state of a cell. Signal transduction begins with reception of a signal (e.g. a ligand binding to a receptor or receptor activation by a stimulus such as light), or for signal transduction in the absence of ligand, signal-withdrawal or the activity of a constitutively active receptor. Signal transduction ends…	6	GO:0007219;GO:0030968;GO:0007224;GO:0007165;GO:0035556;GO:0007263	5	P79379;G9BWQ2;F1RP50;I3LPC6;F1RUL8	P79379(GO:0007263);G9BWQ2(GO:0035556);F1RP50(GO:0030968);I3LPC6(GO:0007219;GO:0007224);F1RUL8(GO:0007165)
GO:0038024	3	4	cargo receptor activity	molecular_function	Combining selectively with an extracellular substance and delivering the substance into the cell via endocytosis. [GOC:bf, GOC:signaling, PMID:15239958]	1	GO:0030229	1	E7CXS1	E7CXS1(GO:0030229)
GO:0006457	3	3	protein folding	biological_process	The process of assisting in the covalent and noncovalent assembly of single chain polypeptides or multisubunit complexes into the correct tertiary structure. [GOC:go_curators, GOC:rb]	1	GO:0051084	1	F1RP50	F1RP50(GO:0051084)
GO:0003006	3	3	developmental process involved in reproduction	biological_process	A developmental process in which a progressive change in the state of some part of an organism specifically contributes to its ability to form offspring. [GOC:dph, GOC:isa_complete]	1	GO:0060674	1	F1RU26	F1RU26(GO:0060674)
GO:0044446	3	4	intracellular organelle part	cellular_component	A constituent part of an intracellular organelle, an organized structure of distinctive morphology and function, occurring within the cell. Includes constituent parts of the nucleus, mitochondria, plastids, vacuoles, vesicles, ribosomes and the cytoskeleton but excludes the plasma membrane. [GOC:jl]	38	GO:0008023;GO:0015934;GO:0005789;GO:0030176;GO:0008024;GO:0016591;GO:0016607;GO:0036064;GO:0016605;GO:0005819;GO:0030660;GO:0005730;GO:0005813;GO:0005635;GO:0000922;GO:0005654;GO:0071556;GO:0000776;GO:0016514;GO:0071458;GO:0005675;GO:0031965;GO:0005765;GO:0031966;GO:0001650;GO:0000790;GO:0032580;GO:0032039;GO:0051233;GO:0005930;GO:0070876;GO:0030658;GO:0031080;GO:0005743;GO:0005740;GO:0005741;GO:…	26	F1SJQ4;F1RFL5;I3LF05;I3L7Q8;F1RWS7;Q06A97;F1SA54;I3LPC6;I3LTC4;F1S7L7;F1RU26;F1S9L2;F1SRJ4;F1SJG5;F1S5K2;F1SED4;F1SLA2;C9E1C9;F1SNA6;F1STY6;F6Q8T7;I3LM88;F1RNN4;F1S8G9;K7GKN2;I3LDJ9	F1SJQ4(GO:0016607);F1RFL5(GO:0005730;GO:0005730;GO:0005730);I3LF05(GO:0005765);I3L7Q8(GO:0005680);F1RWS7(GO:0000922;GO:0005813;GO:0005819;GO:0016591;GO:0016607;GO:0051233);Q06A97(GO:0030658);F1SA54(GO:0032580;GO:0032580);I3LPC6(GO:0005930;GO:0036064);I3LTC4(GO:0005743;GO:0005762;GO:0015934);F1S7L7(GO:0000790);F1RU26(GO:0005654);F1S9L2(GO:0001650;GO:0005741;GO:0005743;GO:0005789;GO:0005789);F1SRJ4…
GO:0044441	3	5	ciliary part	cellular_component	Any constituent part of a cilium, a specialized eukaryotic organelle that consists of a filiform extrusion of the cell surface. Each cilium is bounded by an extrusion of the cytoplasmic (plasma) membrane, and contains a regular longitudinal array of microtubules, anchored basally in a centriole. [GOC:cilia, GOC:jl]	4	GO:0036064;GO:0097225;GO:0005930;GO:0097228	2	F1RNN4;I3LPC6	F1RNN4(GO:0036064;GO:0097225;GO:0097228);I3LPC6(GO:0005930;GO:0036064;GO:0097225;GO:0097228)
GO:0006950	3	3	response to stress	biological_process	Any process that results in a change in state or activity of a cell or an organism (in terms of movement, secretion, enzyme production, gene expression, etc.) as a result of a disturbance in organismal or cellular homeostasis, usually, but not necessarily, exogenous (e.g. temperature, humidity, ionizing radiation). [GOC:mah]	8	GO:0051607;GO:0030968;GO:0006281;GO:0045087;GO:0006289;GO:0006974;GO:0071712;GO:0034198	8	I3LF05;K7GKN2;F1SCY2;F1S9L2;K7GN56;F1SNA6;F1RP50;F6Q8T7	I3LF05(GO:0034198);K7GKN2(GO:0045087;GO:0051607;GO:0051607;GO:0051607);F1SCY2(GO:0051607);F1S9L2(GO:0051607;GO:0051607;GO:0051607);K7GN56(GO:0051607);F1SNA6(GO:0006281;GO:0006281;GO:0006974;GO:0006974);F1RP50(GO:0030968;GO:0071712);F6Q8T7(GO:0006281;GO:0006289)
GO:0006955	3	3	immune response	biological_process	Any immune system process that functions in the calibrated response of an organism to a potential internal or invasive threat. [GO_REF:0000022, GOC:add, GOC:mtg_15nov05]	1	GO:0045087	1	K7GKN2	K7GKN2(GO:0045087)
GO:0007389	3	3	pattern specification process	biological_process	Any developmental process that results in the creation of defined areas or spaces within an organism to which cells respond and eventually are instructed to differentiate. [GOC:go_curators, GOC:isa_complete, ISBN:0521436125]	3	GO:0007368;GO:0009953;GO:0070986	1	I3LPC6	I3LPC6(GO:0007368;GO:0009953;GO:0070986)
GO:0051641	3	3	cellular localization	biological_process	A cellular localization process whereby a substance or cellular entity, such as a protein complex or organelle, is transported to, and/or maintained in, a specific location within a cell including the localization of substances or cellular entities to the cell membrane. [GOC:tb, GOC:vw]	5	GO:0042073;GO:0032439;GO:0035735;GO:0006406;GO:0016973	3	K7GKN2;F1RNN4;F1SJQ4	K7GKN2(GO:0032439);F1RNN4(GO:0035735;GO:0042073;GO:0042073);F1SJQ4(GO:0006406;GO:0016973)
GO:0050789	3	3	regulation of biological process	biological_process	Any process that modulates the frequency, rate or extent of a biological process. Biological processes are regulated by many means; examples include the control of gene expression, protein modification or interaction with a protein or substrate molecule. [GOC:ai, GOC:go_curators]	55	GO:2000369;GO:0008589;GO:0045926;GO:0061045;GO:0043923;GO:0034157;GO:0050680;GO:0010628;GO:0051438;GO:0051147;GO:0031056;GO:0030500;GO:0035556;GO:0042981;GO:0007219;GO:0050709;GO:1900364;GO:0045071;GO:0030100;GO:0043065;GO:0045747;GO:0006357;GO:0045737;GO:0010506;GO:1904179;GO:0071157;GO:2001168;GO:0006282;GO:2000553;GO:0045880;GO:0033129;GO:0001933;GO:0008360;GO:2000117;GO:0034165;GO:0010951;GO:…	26	I3LPC6;F1RP31;I3LF05;F1RWS7;Q0Z8R0;F1RU26;F1S9L2;F1SJG5;K7GKY0;F1S6I1;F1SED4;C9E1C9;I3LT15;P79379;F1RXZ6;F6Q8T7;F1RUL8;I3LM88;F1SG36;F1SUE6;G9BWQ2;K7GKN2;F1SEA5;F1RP50;I3LDJ9;I3LH80	I3LPC6(GO:0007219;GO:0007224;GO:0008589;GO:0045880;GO:0050680);F1RP31(GO:0006355;GO:0006355;GO:0045944);I3LF05(GO:0010506;GO:0032008);F1RWS7(GO:0043923;GO:0070940);Q0Z8R0(GO:0010466;GO:2000117);F1RU26(GO:0006355;GO:0006357;GO:2000144);F1S9L2(GO:0034157;GO:0034165;GO:0045071;GO:0045071;GO:0050709;GO:2000553);F1SJG5(GO:0006355);K7GKY0(GO:0001933;GO:0010839;GO:0010951;GO:0030512;GO:0045616;GO:006104…
GO:0097159	3	3	organic cyclic compound binding	molecular_function	Interacting selectively and non-covalently with an organic cyclic compound, any molecular entity that contains carbon arranged in a cyclic molecular structure. [CHEBI:33832, GOC:sjw, PMID:7583672]	14	GO:0044212;GO:0097322;GO:0001164;GO:0043565;GO:0000166;GO:0017069;GO:0000977;GO:0003676;GO:0003677;GO:0003723;GO:0000978;GO:0000979;GO:0005524;GO:0005525	15	F1SLA2;I3LT15;C9E1C9;F1SJQ4;F1RP31;F1SG36;F1RU26;F1SJG5;G9BWQ2;F1RFL5;K7GKN2;F1SEA5;I3LFY4;F1SBX8;I3LM88	F1SLA2(GO:0001164;GO:0003677);I3LT15(GO:0005524);C9E1C9(GO:0000166;GO:0000979;GO:0003677;GO:0005524;GO:0005524;GO:0017069;GO:0044212;GO:0044212;GO:0097322);F1SJQ4(GO:0003676;GO:0003723;GO:0003723;GO:0003723);F1RP31(GO:0000977;GO:0003677;GO:0003677;GO:0003677);F1SG36(GO:0043565);F1RU26(GO:0000977;GO:0000978;GO:0003677;GO:0003677);F1SJG5(GO:0005524);G9BWQ2(GO:0000166;GO:0005524;GO:0005524);F1RFL5(G…
GO:0097458	3	3	neuron part	cellular_component	Any constituent part of a neuron, the basic cellular unit of nervous tissue. A typical neuron consists of a cell body (often called the soma), an axon, and dendrites. Their purpose is to receive, conduct, and transmit impulses in the nervous system. [GOC:pr, http://en.wikipedia.org/wiki/Neuron]	1	GO:0043005	1	Q06A97	Q06A97(GO:0043005)
GO:0005789	3	6	endoplasmic reticulum membrane	cellular_component	The lipid bilayer surrounding the endoplasmic reticulum. [GOC:mah]	1	GO:0005789	1	F1S9L2	F1S9L2(GO:0005789;GO:0005789)
GO:0051234	3	3	establishment of localization	biological_process	Any process that localizes a substance or cellular component. This may occur via movement, tethering or selective degradation. [GOC:ai, GOC:dos]	8	GO:0016973;GO:0006898;GO:0009306;GO:0006810;GO:0042073;GO:0035735;GO:0015031;GO:0006406	5	F1SJ46;F1SED4;F1RNN4;F1SJQ4;E7CXS1	F1SJ46(GO:0006810;GO:0015031);F1SED4(GO:0009306);F1RNN4(GO:0035735;GO:0042073;GO:0042073);F1SJQ4(GO:0006406;GO:0016973);E7CXS1(GO:0006898)
GO:0048646	3	3	anatomical structure formation involved in morphogenesis	biological_process	The developmental process pertaining to the initial formation of an anatomical structure from unspecified parts. This process begins with the specific processes that contribute to the appearance of the discrete structure and ends when the structural rudiment is recognizable. An anatomical structure is any biological entity that occupies space and is distinguished from its surroundings. Anatomical…	3	GO:0001841;GO:0072675;GO:0001843	2	K7GKY0;I3LPC6	K7GKY0(GO:0072675);I3LPC6(GO:0001841;GO:0001843)
GO:0031090	3	3	organelle membrane	cellular_component	A membrane that is one of the two lipid bilayers of an organelle envelope or the outermost membrane of single membrane bound organelle. [GOC:dos, GOC:mah]	8	GO:0030660;GO:0005765;GO:0031965;GO:0031966;GO:0030658;GO:0005743;GO:0005741;GO:0032580	9	I3LTC4;I3LF05;F1S9L2;F1S8G9;K7GKN2;Q06A97;I3LDJ9;F1S5K2;F1SA54	I3LTC4(GO:0005743);I3LF05(GO:0005765);F1S9L2(GO:0005741;GO:0005743);F1S8G9(GO:0005765;GO:0030660);K7GKN2(GO:0031965;GO:0031966);Q06A97(GO:0030658);I3LDJ9(GO:0005741);F1S5K2(GO:0005743);F1SA54(GO:0032580;GO:0032580)
GO:0009986	3	3	cell surface	cellular_component	The external part of the cell wall and/or plasma membrane. [GOC:jl, GOC:mtg_sensu, GOC:sm]	1	GO:0009986	1	K7GKY0	K7GKY0(GO:0009986)
GO:0065009	3	3	regulation of molecular function	biological_process	Any process that modulates the frequency, rate or extent of a molecular function, an elemental biological activity occurring at the molecular level, such as catalysis or binding. [GOC:isa_complete]	10	GO:0043547;GO:2000117;GO:0000079;GO:0050790;GO:0010466;GO:0045737;GO:0051438;GO:0010951;GO:1903839;GO:0065009	7	C9E1C9;Q0Z8R0;I3LT15;K7GKY0;F1S6I1;F6Q8T7;F1SED4	C9E1C9(GO:1903839);Q0Z8R0(GO:0010466;GO:2000117);I3LT15(GO:0050790);K7GKY0(GO:0010951);F1S6I1(GO:0051438);F6Q8T7(GO:0000079;GO:0045737);F1SED4(GO:0043547;GO:0065009)
GO:0065008	3	3	regulation of biological quality	biological_process	Any process that modulates a qualitative or quantitative trait of a biological quality. A biological quality is a measurable attribute of an organism or part of an organism, such as size, mass, shape, color, etc. [GOC:dph, GOC:isa_complete, GOC:mah, GOC:pr, GOC:vw]	4	GO:0051480;GO:0097345;GO:0008360;GO:0006882	4	I3LDJ9;I3LH80;Q06A97;P79379	I3LDJ9(GO:0097345);I3LH80(GO:0008360);Q06A97(GO:0051480);P79379(GO:0006882)
GO:0042221	3	3	response to chemical	biological_process	Any process that results in a change in state or activity of a cell or an organism (in terms of movement, secretion, enzyme production, gene expression, etc.) as a result of a chemical stimulus. [GOC:jl]	6	GO:0071294;GO:0071345;GO:0071357;GO:0051592;GO:0071712;GO:0035457	6	C9E1C9;P79379;F1SCY2;K7GKN2;F1RP50;F6Q8T7	C9E1C9(GO:0071345);P79379(GO:0071294);F1SCY2(GO:0035457);K7GKN2(GO:0071357);F1RP50(GO:0071712);F6Q8T7(GO:0051592)
GO:0003700	3	3	DNA binding transcription factor activity	molecular_function	Interacting selectively and non-covalently with a specific DNA sequence (sometimes referred to as a motif) within the regulatory region of a gene in order to modulate transcription. [GOC:curators, GOC:txnOH]	2	GO:0003700;GO:0001077	2	F1RU26;I3LM88	F1RU26(GO:0003700);I3LM88(GO:0001077)
GO:0005929	3	5	cilium	cellular_component	A specialized eukaryotic organelle that consists of a filiform extrusion of the cell surface and of some cytoplasmic parts. Each cilium is largely bounded by an extrusion of the cytoplasmic (plasma) membrane, and contains a regular longitudinal array of microtubules, anchored to a basal body. [GOC:cilia, GOC:curators, GOC:kmv, GOC:vw, ISBN:0198547684, PMID:16824949, PMID:17009929, PMID:20144998]	1	GO:0005929	2	F1RNN4;I3LPC6	F1RNN4(GO:0005929;GO:0005929);I3LPC6(GO:0005929)
GO:0036094	3	3	small molecule binding	molecular_function	Interacting selectively and non-covalently with a small molecule, any low molecular weight, monomeric, non-encoded molecule. [GOC:curators, GOC:pde, GOC:pm]	3	GO:0005525;GO:0005524;GO:0000166	8	C9E1C9;I3LT15;F1SJG5;G9BWQ2;F1RFL5;K7GKN2;I3LFY4;I3LM88	C9E1C9(GO:0000166;GO:0005524;GO:0005524);I3LT15(GO:0005524);F1SJG5(GO:0005524);G9BWQ2(GO:0000166;GO:0005524;GO:0005524);F1RFL5(GO:0000166;GO:0005524;GO:0005524);K7GKN2(GO:0000166;GO:0005525;GO:0005525);I3LFY4(GO:0005524);I3LM88(GO:0005524)
GO:0019867	3	3	outer membrane	cellular_component	The external membrane of Gram-negative bacteria or certain organelles such as mitochondria and chloroplasts; freely permeable to most ions and metabolites. [GOC:go_curators]	1	GO:0005741	2	I3LDJ9;F1S9L2	I3LDJ9(GO:0005741);F1S9L2(GO:0005741)
GO:0044419	3	3	interspecies interaction between organisms	biological_process	Any process in which an organism has an effect on an organism of a different species. [GOC:cc]	1	GO:0043923	1	F1RWS7	F1RWS7(GO:0043923)
GO:0005886	3	3	plasma membrane	cellular_component	The membrane surrounding a cell that separates the cell from its external environment. It consists of a phospholipid bilayer and associated proteins. [ISBN:0716731363]	1	GO:0005886	1	F1SP42	F1SP42(GO:0005886;GO:0005886;GO:0005886)
GO:0007017	3	3	microtubule-based process	biological_process	Any cellular process that depends upon or alters the microtubule cytoskeleton, that part of the cytoskeleton comprising microtubules and their associated proteins. [GOC:mah]	3	GO:0035735;GO:0042073;GO:0031122	2	F1RNN4;I3LPC6	F1RNN4(GO:0035735;GO:0042073;GO:0042073);I3LPC6(GO:0031122)
GO:0044238	3	3	primary metabolic process	biological_process	The chemical reactions and pathways involving those compounds which are formed as a part of the normal anabolic and catabolic processes. These processes take place in most, if not all, cells of the organism. [GOC:go_curators, http://www.metacyc.org]	35	GO:0018105;GO:0006470;GO:0016180;GO:0006486;GO:0016567;GO:0006228;GO:0006241;GO:0061614;GO:0006364;GO:0006366;GO:0031293;GO:0006368;GO:0010501;GO:0031297;GO:0018279;GO:0097359;GO:0006468;GO:0006281;GO:0006289;GO:0031167;GO:0006508;GO:0016485;GO:0005975;GO:0006183;GO:0090502;GO:0070940;GO:0000154;GO:0030490;GO:0070816;GO:0070979;GO:0071712;GO:0006351;GO:0006165;GO:0033578;GO:0006412	25	I3LPC6;F1RP31;F1RFL5;I3L7Q8;F1RWS7;F1RHJ0;F1SA54;F1RPV8;I3LTC4;F1RU26;F1RP50;F1S5K2;C9E1C9;I3LT15;F1SDW4;F1RFZ6;F1SNA6;F1STY6;F6Q8T7;I3LM88;F1SBX8;F1SUE6;G9BWQ2;F1S8G9;F1S6I1	I3LPC6(GO:0016485);F1RP31(GO:0006351;GO:0006351);F1RFL5(GO:0010501);I3L7Q8(GO:0070979);F1RWS7(GO:0006470;GO:0070940);F1RHJ0(GO:0000154;GO:0031167);F1SA54(GO:0006486;GO:0033578);F1RPV8(GO:0006165;GO:0006183;GO:0006228;GO:0006241);I3LTC4(GO:0006412);F1RU26(GO:0061614);F1RP50(GO:0006486;GO:0018279;GO:0071712;GO:0097359);F1S5K2(GO:0005975);C9E1C9(GO:0006368;GO:0006468;GO:0006468;GO:0031297;GO:0070816…
GO:0044237	3	3	cellular metabolic process	biological_process	The chemical reactions and pathways by which individual cells transform chemical substances. [GOC:go_curators]	33	GO:0018105;GO:0006470;GO:0006801;GO:0016180;GO:0006486;GO:0019430;GO:0070979;GO:0006241;GO:0061614;GO:0006364;GO:0006366;GO:0006368;GO:0010501;GO:0031297;GO:0018279;GO:0097359;GO:0006468;GO:0006281;GO:0016310;GO:0006289;GO:0031167;GO:0016567;GO:0006183;GO:0090502;GO:0070940;GO:0000154;GO:0030490;GO:0070816;GO:0006228;GO:0006351;GO:0006165;GO:0033578;GO:0006412	21	F1RHJ0;F1RPV8;I3LT15;C9E1C9;I3L7Q8;F1RP31;F6Q8T7;I3LUD1;F1RFZ6;G9BWQ2;F1RFL5;F1RWS7;F1SNA6;F1RP50;F1STY6;F1SBX8;F1S6I1;F1SA54;I3LTC4;F1RU26;I3LM88	F1RHJ0(GO:0000154;GO:0031167);F1RPV8(GO:0006165;GO:0006183;GO:0006228;GO:0006241);I3LT15(GO:0006468;GO:0006468);C9E1C9(GO:0006368;GO:0006468;GO:0006468;GO:0031297;GO:0070816);I3L7Q8(GO:0070979);F1RP31(GO:0006351;GO:0006351);F6Q8T7(GO:0006281;GO:0006289;GO:0006366;GO:0006468);I3LUD1(GO:0006801;GO:0019430);F1RFZ6(GO:0006364;GO:0006364;GO:0030490);G9BWQ2(GO:0006468;GO:0016310;GO:0018105);F1RFL5(GO:0…
GO:0009628	3	3	response to abiotic stimulus	biological_process	Any process that results in a change in state or activity of a cell or an organism (in terms of movement, secretion, enzyme production, gene expression, etc.) as a result of an abiotic (non-living) stimulus. [GOC:hb]	1	GO:0010212	1	F1SNA6	F1SNA6(GO:0010212)
GO:0016491	3	3	oxidoreductase activity	molecular_function	Catalysis of an oxidation-reduction (redox) reaction, a reversible chemical reaction in which the oxidation state of an atom or atoms within a molecule is altered. One substrate acts as a hydrogen or electron donor and becomes oxidized, while the other acts as hydrogen or electron acceptor and becomes reduced. [GOC:go_curators]	2	GO:0004784;GO:0016491	1	I3LUD1	I3LUD1(GO:0004784;GO:0004784;GO:0004784;GO:0016491)
GO:0051716	3	3	cellular response to stimulus	biological_process	Any process that results in a change in state or activity of a cell (in terms of movement, secretion, enzyme production, gene expression, etc.) as a result of a stimulus. The process begins with detection of the stimulus by a cell and ends with a change in state or activity or the cell. [GOC:bf, GOC:jl]	11	GO:0031668;GO:0071294;GO:0030968;GO:0006281;GO:0071345;GO:0071357;GO:0006289;GO:0006974;GO:0071712;GO:0034198;GO:0035457	9	C9E1C9;P79379;F1RU26;F1SCY2;K7GKN2;F1SNA6;F1RP50;I3LF05;F6Q8T7	C9E1C9(GO:0071345);P79379(GO:0071294);F1RU26(GO:0031668);F1SCY2(GO:0035457);K7GKN2(GO:0071357);F1SNA6(GO:0006281;GO:0006281;GO:0006974;GO:0006974);F1RP50(GO:0030968;GO:0071712);I3LF05(GO:0034198);F6Q8T7(GO:0006281;GO:0006289)
GO:0043234	3	3	protein complex	cellular_component	A stable macromolecular complex composed (only) of two or more polypeptide subunits along with any covalently attached molecules (such as lipid anchors or oligosaccharide) or non-protein prosthetic groups (such as nucleotides or metal ions). Prosthetic group in this context refers to a tightly bound cofactor. The component polypeptide subunits may be identical. [GOC:go_curators, http://www.ebi.ac…	11	GO:0061700;GO:0043234;GO:0008023;GO:0008024;GO:0031080;GO:0030992;GO:0005675;GO:0032039;GO:0070876;GO:0033186;GO:0000776	11	C9E1C9;I3LPC6;F1SRJ4;I3LF05;F1RNN4;F1RWS7;F1SNA6;F1RP50;F1STY6;F1S7L7;F6Q8T7	C9E1C9(GO:0008023;GO:0008024;GO:0008024;GO:0008024);I3LPC6(GO:0030992;GO:0030992);F1SRJ4(GO:0000776;GO:0031080;GO:0031080);I3LF05(GO:0061700);F1RNN4(GO:0030992;GO:0030992;GO:0030992);F1RWS7(GO:0043234);F1SNA6(GO:0070876;GO:0070876);F1RP50(GO:0043234);F1STY6(GO:0032039);F1S7L7(GO:0033186;GO:0033186;GO:0043234);F6Q8T7(GO:0005675;GO:0005675;GO:0005675)
GO:0043230	3	3	extracellular organelle	cellular_component	Organized structure of distinctive morphology and function, occurring outside the cell. Includes, for example, extracellular membrane vesicles (EMVs) and the cellulosomes of anaerobic bacteria and fungi. [GOC:jl, PMID:9914479]	2	GO:1903561;GO:0070062	2	F1S5K2;I3LPC6	F1S5K2(GO:0070062);I3LPC6(GO:1903561)
GO:0016043	3	3	cellular component organization	biological_process	A process that results in the assembly, arrangement of constituent parts, or disassembly of a cellular component. [GOC:ai, GOC:jl, GOC:mah]	16	GO:0003374;GO:0007010;GO:0060271;GO:0006338;GO:0097345;GO:0000266;GO:0006334;GO:0006335;GO:0051260;GO:0030036;GO:0031122;GO:0061025;GO:0007296;GO:0016043;GO:0031497;GO:1905515	9	F1S7L7;I3LPC6;F1RU26;F1RNN4;F1SUE6;K7GKN2;F1SJG5;I3LDJ9;I3LH80	F1S7L7(GO:0006334;GO:0006335;GO:0031497);I3LPC6(GO:0031122;GO:0060271;GO:0060271;GO:0060271;GO:1905515);F1RU26(GO:0007296);F1RNN4(GO:0060271;GO:0060271;GO:0060271);F1SUE6(GO:0051260);K7GKN2(GO:0000266;GO:0003374;GO:0061025);F1SJG5(GO:0006338);I3LDJ9(GO:0097345);I3LH80(GO:0007010;GO:0016043;GO:0030036)
GO:0097223	3	3	sperm part	cellular_component	Any constituent part of a sperm, a mature male germ cell that develops from a spermatid. [GOC:cjm]	3	GO:0097598;GO:0097225;GO:0097228	2	F1RNN4;I3LPC6	F1RNN4(GO:0097225;GO:0097228);I3LPC6(GO:0097225;GO:0097228;GO:0097598)
GO:1990748	3	3	cellular detoxification	biological_process	Any process carried out at the cellular level that reduces or removes the toxicity of a toxic substance. These may include transport of the toxic substance away from sensitive areas and to compartments or complexes whose purpose is sequestration of the toxic substance. [GOC:vw]	1	GO:0019430	1	I3LUD1	I3LUD1(GO:0019430)
GO:0071704	3	3	organic substance metabolic process	biological_process	The chemical reactions and pathways involving an organic substance, any molecular entity containing carbon. [CHEBI:50860, GOC:mah]	35	GO:0018105;GO:0006470;GO:0016180;GO:0006486;GO:0016567;GO:0006228;GO:0006241;GO:0061614;GO:0006364;GO:0006366;GO:0031293;GO:0006368;GO:0010501;GO:0031297;GO:0018279;GO:0097359;GO:0006468;GO:0006281;GO:0006289;GO:0031167;GO:0006508;GO:0016485;GO:0005975;GO:0006183;GO:0090502;GO:0070940;GO:0000154;GO:0030490;GO:0070816;GO:0070979;GO:0071712;GO:0006351;GO:0006165;GO:0033578;GO:0006412	25	I3LPC6;F1RP31;F1RFL5;I3L7Q8;F1RWS7;F1RHJ0;F1SA54;F1RPV8;I3LTC4;F1RU26;F1RP50;F1S5K2;C9E1C9;I3LT15;F1SDW4;F1RFZ6;F1SNA6;F1STY6;F6Q8T7;I3LM88;F1SBX8;F1SUE6;G9BWQ2;F1S8G9;F1S6I1	I3LPC6(GO:0016485);F1RP31(GO:0006351;GO:0006351);F1RFL5(GO:0010501);I3L7Q8(GO:0070979);F1RWS7(GO:0006470;GO:0070940);F1RHJ0(GO:0000154;GO:0031167);F1SA54(GO:0006486;GO:0033578);F1RPV8(GO:0006165;GO:0006183;GO:0006228;GO:0006241);I3LTC4(GO:0006412);F1RU26(GO:0061614);F1RP50(GO:0006486;GO:0018279;GO:0071712;GO:0097359);F1S5K2(GO:0005975);C9E1C9(GO:0006368;GO:0006468;GO:0006468;GO:0031297;GO:0070816…
GO:0033036	3	3	macromolecule localization	biological_process	Any process in which a macromolecule is transported to, or maintained in, a specific location. [GOC:mah]	4	GO:0009306;GO:0015031;GO:0035735;GO:0042073	3	F1SJ46;F1RNN4;F1SED4	F1SJ46(GO:0015031);F1RNN4(GO:0035735;GO:0042073;GO:0042073);F1SED4(GO:0009306)
GO:0044463	3	3	cell projection part	cellular_component	Any constituent part of a cell projection, a prolongation or process extending from a cell, e.g. a flagellum or axon. [GOC:jl]	5	GO:0036064;GO:0097225;GO:0005930;GO:0097228;GO:0031526	3	F1S5K2;F1RNN4;I3LPC6	F1S5K2(GO:0031526;GO:0031526);F1RNN4(GO:0036064;GO:0097225;GO:0097228);I3LPC6(GO:0005930;GO:0036064;GO:0097225;GO:0097228)
GO:0042995	3	3	cell projection	cellular_component	A prolongation or process extending from a cell, e.g. a flagellum or axon. [GOC:jl, http://www.cogsci.princeton.edu/~wn/]	2	GO:0043005;GO:0005929	3	F1RNN4;I3LPC6;Q06A97	F1RNN4(GO:0005929;GO:0005929);I3LPC6(GO:0005929);Q06A97(GO:0043005)
GO:0009653	3	3	anatomical structure morphogenesis	biological_process	The process in which anatomical structures are generated and organized. Morphogenesis pertains to the creation of form. [GOC:go_curators, ISBN:0521436125]	1	GO:0001947	1	I3LPC6	I3LPC6(GO:0001947)
GO:0004872	3	3	receptor activity	molecular_function	Combining with an extracellular or intracellular messenger to initiate a change in cell activity. [GOC:ceb, ISBN:0198506732]	1	GO:0030229	1	E7CXS1	E7CXS1(GO:0030229)
GO:0005085	3	6	guanyl-nucleotide exchange factor activity	molecular_function	Stimulates the exchange of guanyl nucleotides associated with a GTPase. Under normal cellular physiological conditions, the concentration of GTP is higher than that of GDP, favoring the replacement of GDP by GTP in association with the GTPase. [GOC:kd, GOC:mah]	1	GO:0005090	1	F1SED4	F1SED4(GO:0005090)
GO:0016853	3	3	isomerase activity	molecular_function	Catalysis of the geometric or structural changes within one molecule. Isomerase is the systematic name for any enzyme of EC class 5. [ISBN:0198506732]	1	GO:0016866	1	I3L7C2	I3L7C2(GO:0016866)
GO:0005615	3	3	extracellular space	cellular_component	That part of a multicellular organism outside the cells proper, usually taken to be outside the plasma membranes, and occupied by fluid. [ISBN:0198547684]	1	GO:0005615	3	K7GKY0;I3LUD1;Q0Z8R0	K7GKY0(GO:0005615;GO:0005615);I3LUD1(GO:0005615);Q0Z8R0(GO:0005615)
GO:0098590	3	4	plasma membrane region	cellular_component	A membrane that is a (regional) part of the plasma membrane. [GOC:dos]	1	GO:0031526	1	F1S5K2	F1S5K2(GO:0031526;GO:0031526)
GO:0048856	3	3	anatomical structure development	biological_process	The biological process whose specific outcome is the progression of an anatomical structure from an initial condition to its mature state. This process begins with the formation of the structure and ends with the mature structure, whatever form that may be including its natural destruction. An anatomical structure is any biological entity that occupies space and is distinguished from its surround…	13	GO:0007507;GO:0001701;GO:0021591;GO:0007420;GO:0007512;GO:0001942;GO:0060173;GO:0060348;GO:0061525;GO:0060674;GO:0008544;GO:0021915;GO:0060021	4	F6Q8T7;K7GKY0;F1RU26;I3LPC6	F6Q8T7(GO:0007512;GO:0021591);K7GKY0(GO:0001942);F1RU26(GO:0001701;GO:0060674);I3LPC6(GO:0007420;GO:0007507;GO:0008544;GO:0021915;GO:0060021;GO:0060173;GO:0060348;GO:0061525)
GO:0030496	3	3	midbody	cellular_component	A thin cytoplasmic bridge formed between daughter cells at the end of cytokinesis. The midbody forms where the contractile ring constricts, and may persist for some time before finally breaking to complete cytokinesis. [ISBN:0815316194]	1	GO:0030496	1	F1RWS7	F1RWS7(GO:0030496)
GO:0003682	3	3	chromatin binding	molecular_function	Interacting selectively and non-covalently with chromatin, the network of fibers of DNA, protein, and sometimes RNA, that make up the chromosomes of the eukaryotic nucleus during interphase. [GOC:jl, ISBN:0198506732, PMID:20404130]	1	GO:0003682	1	C9E1C9	C9E1C9(GO:0003682)
GO:0044877	3	3	macromolecular complex binding	molecular_function	Interacting selectively and non-covalently with any macromolecular complex. [GOC:jl]	1	GO:0035612	1	I3LT15	I3LT15(GO:0035612)
GO:0030029	3	3	actin filament-based process	biological_process	Any cellular process that depends upon or alters the actin cytoskeleton, that part of the cytoskeleton comprising actin filaments and their associated proteins. [GOC:mah]	1	GO:0030036	1	I3LH80	I3LH80(GO:0030036)
GO:0051540	3	3	metal cluster binding	molecular_function	Interacting selectively and non-covalently with a cluster of atoms including both metal ions and nonmetal atoms, usually sulfur and oxygen. Examples include iron-sulfur clusters and nickel-iron-sulfur clusters. [GOC:jsg]	2	GO:0051536;GO:0051539	1	F1S9L2	F1S9L2(GO:0051536;GO:0051539)
GO:0098805	3	3	whole membrane	cellular_component	Any lipid bilayer that completely encloses some structure, and all the proteins embedded in it or attached to it. Examples include the plasma membrane and most organelle membranes. [GOC:dos]	4	GO:0030658;GO:0005765;GO:0005741;GO:0030660	5	F1S8G9;I3LF05;I3LDJ9;Q06A97;F1S9L2	F1S8G9(GO:0005765;GO:0030660);I3LF05(GO:0005765);I3LDJ9(GO:0005741);Q06A97(GO:0030658);F1S9L2(GO:0005741)
GO:1990904	3	3	ribonucleoprotein complex	cellular_component	A macromolecular complex containing both protein and RNA molecules. [GOC:vesicles]	3	GO:0015934;GO:0036464;GO:0005762	3	I3LTC4;C9E1C9;F1SJQ4	I3LTC4(GO:0005762;GO:0015934);C9E1C9(GO:0036464;GO:0036464);F1SJQ4(GO:0036464)
GO:0006928	3	3	movement of cell or subcellular component	biological_process	The directed, self-propelled movement of a cell or subcellular component without the involvement of an external agent such as a transporter or a pore. [GOC:dgh, GOC:dph, GOC:jl, GOC:mlg]	2	GO:0035735;GO:0042073	1	F1RNN4	F1RNN4(GO:0035735;GO:0042073;GO:0042073)
GO:0003735	3	3	structural constituent of ribosome	molecular_function	The action of a molecule that contributes to the structural integrity of the ribosome. [GOC:mah]	1	GO:0003735	1	I3LTC4	I3LTC4(GO:0003735;GO:0003735)
GO:0016740	3	3	transferase activity	molecular_function	Catalysis of the transfer of a group, e.g. a methyl group, glycosyl group, acyl group, phosphorus-containing, or other groups, from one compound (generally regarded as the donor) to another compound (generally regarded as the acceptor). Transferase is the systematic name for any enzyme of EC class 2. [ISBN:0198506732]	13	GO:0000179;GO:0008649;GO:0008424;GO:0016301;GO:0004674;GO:0016740;GO:0004550;GO:0016757;GO:0004672;GO:0004693;GO:0008353;GO:0004842;GO:0003980	10	F1RPV8;C9E1C9;I3LT15;F1S568;G9BWQ2;F1S6I1;F1RHJ0;F1RP50;F1SA54;F6Q8T7	F1RPV8(GO:0004550);C9E1C9(GO:0004672;GO:0004674;GO:0004693;GO:0004693;GO:0008353;GO:0008353;GO:0008353);I3LT15(GO:0004672;GO:0004674);F1S568(GO:0016757);G9BWQ2(GO:0004672;GO:0004674;GO:0004674;GO:0004674;GO:0016301;GO:0016740);F1S6I1(GO:0004842);F1RHJ0(GO:0000179;GO:0008649);F1RP50(GO:0003980;GO:0003980);F1SA54(GO:0008424;GO:0008424;GO:0016740;GO:0016757);F6Q8T7(GO:0008353)
GO:0048869	3	3	cellular developmental process	biological_process	A biological process whose specific outcome is the progression of a cell over time from an initial condition to a later condition. [GOC:isa_complete]	2	GO:0021522;GO:0043367	2	I3LPC6;F1S9L2	I3LPC6(GO:0021522);F1S9L2(GO:0043367)
GO:0032940	3	6	secretion by cell	biological_process	The controlled release of a substance by a cell. [GOC:mah]	1	GO:0009306	1	F1SED4	F1SED4(GO:0009306)
GO:0042393	4	4	histone binding	molecular_function	Interacting selectively and non-covalently with a histone, any of a group of water-soluble proteins found in association with the DNA of eukaroytic chromosomes. They are involved in the condensation and coiling of chromosomes during cell division and have also been implicated in nonspecific suppression of gene activity. [GOC:jl]	1	GO:0042393	2	F1SLA2;F1SJG5	F1SLA2(GO:0042393);F1SJG5(GO:0042393)
GO:0003676	4	4	nucleic acid binding	molecular_function	Interacting selectively and non-covalently with any nucleic acid. [GOC:jl]	11	GO:0044212;GO:0017069;GO:0001164;GO:0043565;GO:0097322;GO:0000977;GO:0003676;GO:0003677;GO:0000978;GO:0000979;GO:0003723	10	F1SLA2;C9E1C9;F1SJQ4;F1RP31;F1SG36;F1RU26;F1RFL5;F1SEA5;F1SBX8;I3LM88	F1SLA2(GO:0001164;GO:0003677);C9E1C9(GO:0000979;GO:0003677;GO:0017069;GO:0044212;GO:0044212;GO:0097322);F1SJQ4(GO:0003676;GO:0003723;GO:0003723;GO:0003723);F1RP31(GO:0000977;GO:0003677;GO:0003677;GO:0003677);F1SG36(GO:0043565);F1RU26(GO:0000977;GO:0000978;GO:0003677;GO:0003677);F1RFL5(GO:0003676;GO:0003723;GO:0003723);F1SEA5(GO:0003723);F1SBX8(GO:0003723);I3LM88(GO:0000978;GO:0003676;GO:0003723)
GO:1903047	4	4	mitotic cell cycle process	biological_process	A process that is part of the mitotic cell cycle. [GO_REF:0000060, GOC:mtg_cell_cycle, GOC:TermGenie]	1	GO:0010458	1	F1RWS7	F1RWS7(GO:0010458)
GO:0043413	4	6	macromolecule glycosylation	biological_process	The covalent attachment of a glycosyl residue to one or more monomeric units in a polypeptide, polynucleotide, polysaccharide, or other biological macromolecule. [GOC:jl]	3	GO:0033578;GO:0018279;GO:0006486	2	F1SA54;F1RP50	F1SA54(GO:0006486;GO:0033578);F1RP50(GO:0006486;GO:0018279)
GO:0043414	4	6	macromolecule methylation	biological_process	The covalent attachment of a methyl residue to one or more monomeric units in a polypeptide, polynucleotide, polysaccharide, or other biological macromolecule. [GOC:go_curators]	1	GO:0031167	1	F1RHJ0	F1RHJ0(GO:0031167)
GO:0006325	4	4	chromatin organization	biological_process	Any process that results in the specification, formation or maintenance of the physical structure of eukaryotic chromatin. [GOC:mah, GOC:vw, PMID:20404130]	4	GO:0006334;GO:0006335;GO:0031497;GO:0006338	2	F1SJG5;F1S7L7	F1SJG5(GO:0006338);F1S7L7(GO:0006334;GO:0006335;GO:0031497)
GO:0042802	4	4	identical protein binding	molecular_function	Interacting selectively and non-covalently with an identical protein or proteins. [GOC:jl]	1	GO:0042802	2	K7GKN2;F1S7L7	K7GKN2(GO:0042802);F1S7L7(GO:0042802)
GO:0044770	4	4	cell cycle phase transition	biological_process	The cell cycle process by which a cell commits to entering the next cell cycle phase. [GOC:mtg_cell_cycle]	1	GO:0010458	1	F1RWS7	F1RWS7(GO:0010458)
GO:0043207	4	4	response to external biotic stimulus	biological_process	Any process that results in a change in state or activity of a cell or an organism (in terms of movement, secretion, enzyme production, gene expression, etc.) as a result of an external biotic stimulus, an external stimulus caused by, or produced by living things. [GOC:go_curators]	2	GO:0009615;GO:0051607	4	K7GKN2;K7GN56;F1SCY2;F1S9L2	K7GKN2(GO:0009615;GO:0051607;GO:0051607;GO:0051607);K7GN56(GO:0051607);F1SCY2(GO:0051607);F1S9L2(GO:0009615;GO:0009615;GO:0051607;GO:0051607;GO:0051607)
GO:0019637	4	5	organophosphate metabolic process	biological_process	The chemical reactions and pathways involving organophosphates, any phosphate-containing organic compound. [ISBN:0198506732]	4	GO:0006228;GO:0006241;GO:0006183;GO:0006165	1	F1RPV8	F1RPV8(GO:0006165;GO:0006183;GO:0006228;GO:0006241)
GO:0048731	4	4	system development	biological_process	The process whose specific outcome is the progression of an organismal system over time, from its formation to the mature structure. A system is a regularly interacting or interdependent group of organs or tissues that work together to carry out a given biological process. [GOC:dph, GOC:jid]	1	GO:0021591	1	F6Q8T7	F6Q8T7(GO:0021591)
GO:0048736	4	4	appendage development	biological_process	The process whose specific outcome is the progression of an appendage over time, from its formation to the mature structure. An appendage is an organ or part that is attached to the trunk of an organism, such as a limb or a branch. [GOC:jid, GOC:rc]	1	GO:0060173	1	I3LPC6	I3LPC6(GO:0060173)
GO:0016798	4	4	hydrolase activity, acting on glycosyl bonds	molecular_function	Catalysis of the hydrolysis of any glycosyl bond. [GOC:jl]	1	GO:0004649	1	F1SDW4	F1SDW4(GO:0004649)
GO:0022607	4	4	cellular component assembly	biological_process	The aggregation, arrangement and bonding together of a cellular component. [GOC:isa_complete]	7	GO:0003374;GO:0060271;GO:0006334;GO:0006335;GO:0051260;GO:0031497;GO:1905515	5	F1SUE6;K7GKN2;F1RNN4;F1S7L7;I3LPC6	F1SUE6(GO:0051260);K7GKN2(GO:0003374);F1RNN4(GO:0060271;GO:0060271;GO:0060271);F1S7L7(GO:0006334;GO:0006335;GO:0031497);I3LPC6(GO:0060271;GO:0060271;GO:0060271;GO:1905515)
GO:0004540	4	6	ribonuclease activity	molecular_function	Catalysis of the hydrolysis of phosphodiester bonds in chains of RNA. [GOC:mah, ISBN:0198547684]	1	GO:0033897	1	F1SBX8	F1SBX8(GO:0033897)
GO:0005737	4	4	cytoplasm	cellular_component	All of the contents of a cell excluding the plasma membrane and nucleus, but including other subcellular structures. [ISBN:0198547684]	1	GO:0005737	9	Q767M0;I3LT15;P79379;I3LUD1;F1SEA5;F1RFL5;K7GKN2;F1RXZ6;Q06A97	Q767M0(GO:0005737);I3LT15(GO:0005737);P79379(GO:0005737);I3LUD1(GO:0005737);F1SEA5(GO:0005737);F1RFL5(GO:0005737);K7GKN2(GO:0005737;GO:0005737;GO:0005737);F1RXZ6(GO:0005737);Q06A97(GO:0005737;GO:0005737)
GO:0019207	4	4	kinase regulator activity	molecular_function	Modulates the activity of a kinase, an enzyme which catalyzes of the transfer of a phosphate group, usually from ATP, to a substrate molecule. [GOC:ai]	1	GO:0061575	1	F6Q8T7	F6Q8T7(GO:0061575)
GO:0019208	4	4	phosphatase regulator activity	molecular_function	Modulates the activity of a phosphatase, an enzyme which catalyzes of the removal of a phosphate group from a substrate molecule. [GOC:ai]	1	GO:0019208	1	I3LT15	I3LT15(GO:0019208)
GO:0035821	4	4	modification of morphology or physiology of other organism	biological_process	The process in which an organism effects a change in the structure or processes of a second organism. [GOC:bf]	1	GO:0043923	1	F1RWS7	F1RWS7(GO:0043923)
GO:0098869	4	4	cellular oxidant detoxification	biological_process	Any process carried out at the cellular level that reduces or removes the toxicity superoxide radicals or hydrogen peroxide. [GOC:dos, GOC:vw]	1	GO:0019430	1	I3LUD1	I3LUD1(GO:0019430)
GO:0032039	4	7	integrator complex	cellular_component	A protein complex that stably associates with the C-terminus of RNA polymerase II and mediates 3'-end processing of small nuclear RNAs generated by RNA polymerase II. [PMID:16239144]	1	GO:0032039	1	F1STY6	F1STY6(GO:0032039)
GO:0030992	4	4	intraciliary transport particle B	cellular_component	The larger subcomplex of the intraciliary transport particle; characterized complexes have molecular weights around 550 kDa. [GOC:cilia, GOC:kmv, PMID:14570576, PMID:19253336]	1	GO:0030992	2	F1RNN4;I3LPC6	F1RNN4(GO:0030992;GO:0030992;GO:0030992);I3LPC6(GO:0030992;GO:0030992)
GO:0060674	4	5	placenta blood vessel development	biological_process	The process whose specific outcome is the progression of a blood vessel of the placenta over time, from its formation to the mature structure. [GOC:dph, PMID:16916377]	1	GO:0060674	1	F1RU26	F1RU26(GO:0060674)
GO:0045184	4	5	establishment of protein localization	biological_process	The directed movement of a protein to a specific location. [GOC:bf]	4	GO:0009306;GO:0015031;GO:0035735;GO:0042073	3	F1SJ46;F1RNN4;F1SED4	F1SJ46(GO:0015031);F1RNN4(GO:0035735;GO:0042073;GO:0042073);F1SED4(GO:0009306)
GO:0046649	4	5	lymphocyte activation	biological_process	A change in morphology and behavior of a lymphocyte resulting from exposure to a specific antigen, mitogen, cytokine, chemokine, cellular ligand, or soluble factor. [GOC:mgi_curators, ISBN:0781735140]	2	GO:0043367;GO:0035710	1	F1S9L2	F1S9L2(GO:0035710;GO:0043367)
GO:0019899	4	4	enzyme binding	molecular_function	Interacting selectively and non-covalently with any enzyme. [GOC:jl]	8	GO:0031625;GO:0005090;GO:0051020;GO:0017048;GO:0019901;GO:0019903;GO:0019902;GO:0002020	8	Q767M0;Q0Z8R0;F1SUE6;I3L7Q8;C9E1C9;I3LH80;F1SED4;I3LM88	Q767M0(GO:0019902);Q0Z8R0(GO:0002020);F1SUE6(GO:0002020);I3L7Q8(GO:0019903);C9E1C9(GO:0019901);I3LH80(GO:0017048);F1SED4(GO:0005090;GO:0051020);I3LM88(GO:0031625)
GO:0030660	4	6	Golgi-associated vesicle membrane	cellular_component	The lipid bilayer surrounding a vesicle associated with the Golgi apparatus. [GOC:mah]	1	GO:0030660	1	F1S8G9	F1S8G9(GO:0030660)
GO:1901135	4	4	carbohydrate derivative metabolic process	biological_process	The chemical reactions and pathways involving carbohydrate derivative. [GOC:TermGenie]	4	GO:0006228;GO:0006241;GO:0006183;GO:0097359	2	F1RPV8;F1RP50	F1RPV8(GO:0006183;GO:0006228;GO:0006241);F1RP50(GO:0097359)
GO:0008023	4	7	transcription elongation factor complex	cellular_component	Any protein complex that interacts with RNA polymerase II to increase (positive transcription elongation factor) or reduce (negative transcription elongation factor) the rate of transcription elongation. [GOC:jl]	2	GO:0008023;GO:0008024	1	C9E1C9	C9E1C9(GO:0008023;GO:0008024;GO:0008024;GO:0008024)
GO:1904949	4	4	ATPase complex	cellular_component	A protein complex which is capable of ATPase activity. [GO_REF:0000088, GOC:bhm, GOC:TermGenie, PMID:9606181]	1	GO:0016514	1	F1SJG5	F1SJG5(GO:0016514)
GO:0005090	4	7	Sar guanyl-nucleotide exchange factor activity	molecular_function	Stimulates the exchange of guanyl nucleotides associated with a GTPase of the Sar family. Under normal cellular physiological conditions, the concentration of GTP is higher than that of GDP, favoring the replacement of GDP by GTP in association with the GTPase. [GOC:mah]	1	GO:0005090	1	F1SED4	F1SED4(GO:0005090)
GO:0044087	4	4	regulation of cellular component biogenesis	biological_process	Any process that modulates the frequency, rate or extent of cellular component biogenesis, a process that results in the biosynthesis of constituent macromolecules, assembly, and arrangement of constituent parts of a cellular component. [GOC:jl]	2	GO:0003400;GO:2000144	2	F1RU26;F1SED4	F1RU26(GO:2000144);F1SED4(GO:0003400)
GO:0031227	4	6	intrinsic component of endoplasmic reticulum membrane	cellular_component	The component of the endoplasmic reticulum membrane consisting of the gene products and protein complexes having either part of their peptide sequence embedded in the hydrophobic region of the membrane or some other covalently attached group such as a GPI anchor that is similarly embedded in the membrane. [GOC:dos, GOC:mah]	3	GO:0071458;GO:0071556;GO:0030176	2	F1S8G9;F1SED4	F1S8G9(GO:0071458;GO:0071556);F1SED4(GO:0030176)
GO:0090559	4	4	regulation of membrane permeability	biological_process	Any process that modulates the frequency, rate or extent of the passage or uptake of molecules by a membrane. [GOC:kmv, PMID:22677064]	1	GO:0097345	1	I3LDJ9	I3LDJ9(GO:0097345)
GO:0009991	4	4	response to extracellular stimulus	biological_process	Any process that results in a change in state or activity of a cell or an organism (in terms of movement, secretion, enzyme production, gene expression, etc.) as a result of an extracellular stimulus. [GOC:go_curators]	2	GO:0031668;GO:0034198	2	I3LF05;F1RU26	I3LF05(GO:0034198);F1RU26(GO:0031668)
GO:0098588	4	4	bounding membrane of organelle	cellular_component	The lipid bilayer that forms the outer-most layer of an organelle. [GOC:dos]	5	GO:0030658;GO:0005765;GO:0032580;GO:0005741;GO:0030660	6	I3LF05;F1S9L2;F1S8G9;Q06A97;I3LDJ9;F1SA54	I3LF05(GO:0005765);F1S9L2(GO:0005741);F1S8G9(GO:0005765;GO:0030660);Q06A97(GO:0030658);I3LDJ9(GO:0005741);F1SA54(GO:0032580;GO:0032580)
GO:0005930	4	6	axoneme	cellular_component	The bundle of microtubules and associated proteins that forms the core of cilia (also called flagella) in eukaryotic cells and is responsible for their movements. [GOC:bf, GOC:cilia, ISBN:0198547684]	1	GO:0005930	1	I3LPC6	I3LPC6(GO:0005930)
GO:0060589	4	4	nucleoside-triphosphatase regulator activity	molecular_function	Modulates the rate of NTP hydrolysis by a NTPase. [GOC:dph, GOC:tb]	2	GO:0005090;GO:0005096	1	F1SED4	F1SED4(GO:0005090;GO:0005096)
GO:0030030	4	4	cell projection organization	biological_process	A process that is carried out at the cellular level which results in the assembly, arrangement of constituent parts, or disassembly of a prolongation or process extending from a cell, e.g. a flagellum or axon. [GOC:jl, GOC:mah, http://www.cogsci.princeton.edu/~wn/]	2	GO:1905515;GO:0060271	2	F1RNN4;I3LPC6	F1RNN4(GO:0060271;GO:0060271;GO:0060271);I3LPC6(GO:0060271;GO:0060271;GO:0060271;GO:1905515)
GO:0030036	4	6	actin cytoskeleton organization	biological_process	A process that is carried out at the cellular level which results in the assembly, arrangement of constituent parts, or disassembly of cytoskeletal structures comprising actin filaments and their associated proteins. [GOC:dph, GOC:jl, GOC:mah]	1	GO:0030036	1	I3LH80	I3LH80(GO:0030036)
GO:0070876	4	6	SOSS complex	cellular_component	A protein complex that functions downstream of the MRN complex to promote DNA repair and the G2/M checkpoint. The SOSS complex associates with single-stranded DNA at DNA lesions and is composed of SOSS-B (SOSS-B1/OBFC2B or SOSS-B2/OBFC2A), SOSS-A/INTS3 and SOSS-C/C9orf80. [PMID:19683501]	1	GO:0070876	1	F1SNA6	F1SNA6(GO:0070876;GO:0070876)
GO:0051082	4	4	unfolded protein binding	molecular_function	Interacting selectively and non-covalently with an unfolded protein. [GOC:ai]	1	GO:0051082	1	F1RP50	F1RP50(GO:0051082)
GO:0061024	4	4	membrane organization	biological_process	A process which results in the assembly, arrangement of constituent parts, or disassembly of a membrane. A membrane is a double layer of lipid molecules that encloses all cells, and, in eukaryotes, many organelles; may be a single or double lipid bilayer; also includes associated proteins. [GOC:dph, GOC:tb]	2	GO:0061025;GO:0097345	2	I3LDJ9;K7GKN2	I3LDJ9(GO:0097345);K7GKN2(GO:0061025)
GO:0009790	4	5	embryo development	biological_process	The process whose specific outcome is the progression of an embryo from its formation until the end of its embryonic life stage. The end of the embryonic stage is organism-specific. For example, for mammals, the process would begin with zygote formation and end with birth. For insects, the process would begin at zygote formation and end with larval hatching. For plant zygotic embryos, this would …	1	GO:0001701	1	F1RU26	F1RU26(GO:0001701)
GO:0009799	4	4	specification of symmetry	biological_process	The establishment of an organism's body plan or part of an organism such that a similar arrangement in form and relationship of parts around a common axis, or around each side of a plane is created. [GOC:go_curators]	1	GO:0007368	1	I3LPC6	I3LPC6(GO:0007368)
GO:0009798	4	4	axis specification	biological_process	The establishment, maintenance and elaboration of a pattern along a line or around a point. [GOC:dph, GOC:go_curators, GOC:isa_complete]	1	GO:0070986	1	I3LPC6	I3LPC6(GO:0070986)
GO:0046483	4	4	heterocycle metabolic process	biological_process	The chemical reactions and pathways involving heterocyclic compounds, those with a cyclic molecular structure and at least two different atoms in the ring (or rings). [CHEBI:5686, ISBN:0198506732]	19	GO:0016180;GO:0090502;GO:0006351;GO:0031167;GO:0006281;GO:0000154;GO:0030490;GO:0006289;GO:0006228;GO:0006241;GO:0061614;GO:0006364;GO:0006165;GO:0006366;GO:0006368;GO:0010501;GO:0031297;GO:0006183;GO:0097359	13	F1RPV8;C9E1C9;F1RP31;F1RFL5;F1SBX8;F1RFZ6;F1SNA6;F1RP50;F1RHJ0;F6Q8T7;I3LM88;F1RU26;F1STY6	F1RPV8(GO:0006165;GO:0006183;GO:0006228;GO:0006241);C9E1C9(GO:0006368;GO:0031297);F1RP31(GO:0006351;GO:0006351);F1RFL5(GO:0010501);F1SBX8(GO:0090502);F1RFZ6(GO:0006364;GO:0006364;GO:0030490);F1SNA6(GO:0006281;GO:0006281);F1RP50(GO:0097359);F1RHJ0(GO:0000154;GO:0031167);F6Q8T7(GO:0006281;GO:0006289;GO:0006366);I3LM88(GO:0006366);F1RU26(GO:0061614);F1STY6(GO:0016180)
GO:0044428	4	5	nuclear part	cellular_component	Any constituent part of the nucleus, a membrane-bounded organelle of eukaryotic cells in which chromosomes are housed and replicated. [GOC:jl]	17	GO:0016607;GO:0001650;GO:0016605;GO:0008023;GO:0008024;GO:0031080;GO:0005730;GO:0005635;GO:0031965;GO:0032039;GO:0005654;GO:0000790;GO:0016514;GO:0005675;GO:0016591;GO:0070876;GO:0005680	17	F1SLA2;F1S7L7;C9E1C9;F1SJQ4;F1SRJ4;F1RU26;K7GKN2;I3L7Q8;F1S9L2;F1RFL5;F1RWS7;F1SNA6;F1STY6;F1SJG5;I3LDJ9;F6Q8T7;I3LM88	F1SLA2(GO:0016607);F1S7L7(GO:0000790);C9E1C9(GO:0005654;GO:0005654;GO:0008023;GO:0008024;GO:0008024;GO:0008024;GO:0016605);F1SJQ4(GO:0016607);F1SRJ4(GO:0005654;GO:0031080;GO:0031080);F1RU26(GO:0005654);K7GKN2(GO:0031965);I3L7Q8(GO:0005680);F1S9L2(GO:0001650);F1RFL5(GO:0005730;GO:0005730;GO:0005730);F1RWS7(GO:0016591;GO:0016607);F1SNA6(GO:0005654;GO:0070876;GO:0070876);F1STY6(GO:0032039);F1SJG5(GO…
GO:0044429	4	5	mitochondrial part	cellular_component	Any constituent part of a mitochondrion, a semiautonomous, self replicating organelle that occurs in varying numbers, shapes, and sizes in the cytoplasm of virtually all eukaryotic cells. It is notably the site of tissue respiration. [GOC:jl]	5	GO:0005743;GO:0005740;GO:0005741;GO:0005762;GO:0031966	5	I3LDJ9;F1S5K2;I3LTC4;K7GKN2;F1S9L2	I3LDJ9(GO:0005740;GO:0005741);F1S5K2(GO:0005743);I3LTC4(GO:0005743;GO:0005762);K7GKN2(GO:0031966);F1S9L2(GO:0005741;GO:0005743)
GO:0044427	4	5	chromosomal part	cellular_component	Any constituent part of a chromosome, a structure composed of a very long molecule of DNA and associated proteins (e.g. histones) that carries hereditary information. [GOC:jl]	3	GO:0000790;GO:0000776;GO:0016514	3	F1SRJ4;F1SJG5;F1S7L7	F1SRJ4(GO:0000776);F1SJG5(GO:0016514);F1S7L7(GO:0000790)
GO:0009615	4	6	response to virus	biological_process	Any process that results in a change in state or activity of a cell or an organism (in terms of movement, secretion, enzyme production, gene expression, etc.) as a result of a stimulus from a virus. [GOC:hb]	2	GO:0009615;GO:0051607	4	K7GKN2;K7GN56;F1SCY2;F1S9L2	K7GKN2(GO:0009615;GO:0051607;GO:0051607;GO:0051607);K7GN56(GO:0051607);F1SCY2(GO:0051607);F1S9L2(GO:0009615;GO:0009615;GO:0051607;GO:0051607;GO:0051607)
GO:0008104	4	4	protein localization	biological_process	Any process in which a protein is transported to, or maintained in, a specific location. [GOC:ai]	4	GO:0009306;GO:0015031;GO:0035735;GO:0042073	3	F1SJ46;F1RNN4;F1SED4	F1SJ46(GO:0015031);F1RNN4(GO:0035735;GO:0042073;GO:0042073);F1SED4(GO:0009306)
GO:0000776	4	6	kinetochore	cellular_component	A multisubunit complex that is located at the centromeric region of DNA and provides an attachment point for the spindle microtubules. [GOC:elh]	1	GO:0000776	1	F1SRJ4	F1SRJ4(GO:0000776)
GO:0016817	4	4	hydrolase activity, acting on acid anhydrides	molecular_function	Catalysis of the hydrolysis of any acid anhydride. [GOC:jl]	7	GO:0008094;GO:0016818;GO:0003924;GO:0016817;GO:0004004;GO:0004386;GO:0016887	5	F1RFL5;F1SJG5;F6Q8T7;K7GKN2;I3LM88	F1RFL5(GO:0004004;GO:0004386);F1SJG5(GO:0016817;GO:0016887);F6Q8T7(GO:0008094);K7GKN2(GO:0003924;GO:0003924;GO:0003924);I3LM88(GO:0016818;GO:0016887)
GO:0002682	4	4	regulation of immune system process	biological_process	Any process that modulates the frequency, rate, or extent of an immune system process. [GOC:add]	3	GO:0034157;GO:2000553;GO:0034165	1	F1S9L2	F1S9L2(GO:0034157;GO:0034165;GO:2000553)
GO:0051702	4	4	interaction with symbiont	biological_process	An interaction between two organisms living together in more or less intimate association. The term symbiont is used for the smaller (macro) of the two members of a symbiosis; the various forms of symbiosis include parasitism, commensalism and mutualism. [GOC:cc]	1	GO:0043923	1	F1RWS7	F1RWS7(GO:0043923)
GO:0097435	4	4	supramolecular fiber organization	biological_process	A process that is carried out at the cellular level which results in the assembly, arrangement of constituent parts, or disassembly of a supramolecular fiber, a polymer consisting of an indefinite number of protein or protein complex subunits that have polymerised to form a fiber-shaped structure. [GOC:pr]	1	GO:0031122	1	I3LPC6	I3LPC6(GO:0031122)
GO:0071496	4	4	cellular response to external stimulus	biological_process	Any process that results in a change in state or activity of a cell (in terms of movement, secretion, enzyme production, gene expression, etc.) as a result of an external stimulus. [GOC:mah]	2	GO:0031668;GO:0034198	2	I3LF05;F1RU26	I3LF05(GO:0034198);F1RU26(GO:0031668)
GO:0003724	4	9	RNA helicase activity	molecular_function	Catalysis of the reaction: NTP + H2O = NDP + phosphate, to drive the unwinding of a RNA helix. [GOC:jl, GOC:mah]	1	GO:0004004	1	F1RFL5	F1RFL5(GO:0004004)
GO:1901265	4	4	nucleoside phosphate binding	molecular_function	Interacting selectively and non-covalently with nucleoside phosphate. [GOC:TermGenie]	3	GO:0005525;GO:0005524;GO:0000166	8	C9E1C9;I3LT15;F1SJG5;G9BWQ2;F1RFL5;K7GKN2;I3LFY4;I3LM88	C9E1C9(GO:0000166;GO:0005524;GO:0005524);I3LT15(GO:0005524);F1SJG5(GO:0005524);G9BWQ2(GO:0000166;GO:0005524;GO:0005524);F1RFL5(GO:0000166;GO:0005524;GO:0005524);K7GKN2(GO:0000166;GO:0005525;GO:0005525);I3LFY4(GO:0005524);I3LM88(GO:0005524)
GO:0043169	4	4	cation binding	molecular_function	Interacting selectively and non-covalently with cations, charged atoms or groups of atoms with a net positive charge. [GOC:jl]	4	GO:0005507;GO:0046872;GO:0008270;GO:0005509	8	F1SLA2;I3LTC4;P79379;I3LUD1;Q06A97;E7CXS1;F1SP42;I3LM88	F1SLA2(GO:0046872);I3LTC4(GO:0046872);P79379(GO:0008270;GO:0046872;GO:0046872;GO:0046872);I3LUD1(GO:0005507;GO:0008270;GO:0046872;GO:0046872);Q06A97(GO:0005509;GO:0005509;GO:0046872);E7CXS1(GO:0005509);F1SP42(GO:0005509);I3LM88(GO:0008270)
GO:0004721	4	7	phosphoprotein phosphatase activity	molecular_function	Catalysis of the reaction: a phosphoprotein + H2O = a protein + phosphate. Together with protein kinases, these enzymes control the state of phosphorylation of cell proteins and thereby provide an important mechanism for regulating cellular activity. [EC:3.1.3.16, ISBN:0198547684]	1	GO:0008420	1	F1RWS7	F1RWS7(GO:0008420;GO:0008420)
GO:0017171	4	4	serine hydrolase activity	molecular_function	Catalysis of the hydrolysis of a substrate by a catalytic mechanism that involves a catalytic triad consisting of a serine nucleophile that is activated by a proton relay involving an acidic residue (e.g. aspartate or glutamate) and a basic residue (usually histidine). [Wikipedia:Serine_hydrolase]	1	GO:0004252	1	F1SUE6	F1SUE6(GO:0004252;GO:0004252)
GO:0019222	4	4	regulation of metabolic process	biological_process	Any process that modulates the frequency, rate or extent of the chemical reactions and pathways within a cell or an organism. [GOC:go_curators]	22	GO:0010628;GO:0051438;GO:0031056;GO:1900364;GO:0010466;GO:0045944;GO:0010506;GO:2001168;GO:0006282;GO:0033129;GO:0043923;GO:0010951;GO:0070940;GO:0031998;GO:0000079;GO:0070816;GO:0006355;GO:0006357;GO:0045737;GO:2000144;GO:2000117;GO:0001933	14	C9E1C9;Q0Z8R0;F1RP31;F1SG36;I3LF05;F1RU26;F1SUE6;F1SJG5;F1RWS7;F1SEA5;F1S6I1;K7GKY0;F6Q8T7;I3LM88	C9E1C9(GO:0006282;GO:0031056;GO:0033129;GO:0033129;GO:0045944;GO:0045944;GO:0070816;GO:1900364;GO:2001168;GO:2001168);Q0Z8R0(GO:0010466;GO:2000117);F1RP31(GO:0006355;GO:0006355;GO:0045944);F1SG36(GO:0006355);I3LF05(GO:0010506);F1RU26(GO:0006355;GO:0006357;GO:2000144);F1SUE6(GO:0031998;GO:0031998);F1SJG5(GO:0006355);F1RWS7(GO:0043923;GO:0070940);F1SEA5(GO:0010628);F1S6I1(GO:0051438);K7GKY0(GO:0001…
GO:1901564	4	4	organonitrogen compound metabolic process	biological_process	The chemical reactions and pathways involving organonitrogen compound. [GOC:pr, GOC:TermGenie]	18	GO:0016485;GO:0006468;GO:0018105;GO:0070940;GO:0006486;GO:0016567;GO:0006228;GO:0006470;GO:0070816;GO:0006412;GO:0070979;GO:0006241;GO:0071712;GO:0031293;GO:0006508;GO:0033578;GO:0018279;GO:0006183	14	F1RPV8;I3LTC4;C9E1C9;I3LPC6;I3LT15;F1SUE6;G9BWQ2;F1S8G9;F1RWS7;F1RP50;I3L7Q8;F1S6I1;F6Q8T7;F1SA54	F1RPV8(GO:0006183;GO:0006228;GO:0006241);I3LTC4(GO:0006412);C9E1C9(GO:0006468;GO:0006468;GO:0070816);I3LPC6(GO:0016485);I3LT15(GO:0006468;GO:0006468);F1SUE6(GO:0006508;GO:0016485;GO:0016485);G9BWQ2(GO:0006468;GO:0018105);F1S8G9(GO:0031293);F1RWS7(GO:0006470;GO:0070940);F1RP50(GO:0006486;GO:0018279;GO:0071712);I3L7Q8(GO:0070979);F1S6I1(GO:0016567);F6Q8T7(GO:0006468);F1SA54(GO:0006486;GO:0033578)
GO:0061134	4	4	peptidase regulator activity	molecular_function	Modulates the activity of a peptidase, any enzyme that catalyzes the hydrolysis peptide bonds. [GOC:dph, GOC:tb]	3	GO:0004869;GO:0030414;GO:0004866	2	K7GKY0;Q0Z8R0	K7GKY0(GO:0004866);Q0Z8R0(GO:0004869;GO:0004869;GO:0004869;GO:0030414)
GO:0046907	4	5	intracellular transport	biological_process	The directed movement of substances within a cell. [GOC:ai]	4	GO:0042073;GO:0035735;GO:0006406;GO:0016973	2	F1RNN4;F1SJQ4	F1RNN4(GO:0035735;GO:0042073;GO:0042073);F1SJQ4(GO:0006406;GO:0016973)
GO:0000307	4	8	cyclin-dependent protein kinase holoenzyme complex	cellular_component	Cyclin-dependent protein kinases (CDKs) are enzyme complexes that contain a kinase catalytic subunit associated with a regulatory cyclin partner. [GOC:krc, PMID:11602261]	1	GO:0008024	1	C9E1C9	C9E1C9(GO:0008024;GO:0008024;GO:0008024)
GO:0001882	4	4	nucleoside binding	molecular_function	Interacting selectively and non-covalently with a nucleoside, a compound consisting of a purine or pyrimidine nitrogenous base linked either to ribose or deoxyribose. [GOC:hjd]	1	GO:0005525	1	K7GKN2	K7GKN2(GO:0005525;GO:0005525)
GO:0008134	4	4	transcription factor binding	molecular_function	Interacting selectively and non-covalently with a transcription factor, any protein required to initiate or regulate transcription. [ISBN:0198506732]	4	GO:0030957;GO:0001096;GO:0008134;GO:0001223	2	F1RWS7;C9E1C9	F1RWS7(GO:0001096;GO:0030957);C9E1C9(GO:0001223;GO:0008134)
GO:1903561	4	5	extracellular vesicle	cellular_component	Any vesicle that is part of the extracellular region. [GO_REF:0000064, GOC:pm, GOC:TermGenie, PMID:24769233]	2	GO:1903561;GO:0070062	2	F1S5K2;I3LPC6	F1S5K2(GO:0070062);I3LPC6(GO:1903561)
GO:0048583	4	4	regulation of response to stimulus	biological_process	Any process that modulates the frequency, rate or extent of a response to a stimulus. Response to stimulus is a change in state or activity of a cell or an organism (in terms of movement, secretion, enzyme production, gene expression, etc.) as a result of a stimulus. [GOC:jid]	10	GO:0008589;GO:0006282;GO:2000553;GO:0032008;GO:0034157;GO:0045747;GO:0045880;GO:0061045;GO:0034165;GO:0030512	6	C9E1C9;I3LPC6;I3LT15;I3LF05;F1S9L2;K7GKY0	C9E1C9(GO:0006282);I3LPC6(GO:0008589;GO:0045880);I3LT15(GO:0045747);I3LF05(GO:0032008);F1S9L2(GO:0034157;GO:0034165;GO:2000553);K7GKY0(GO:0030512;GO:0061045)
GO:0050793	4	4	regulation of developmental process	biological_process	Any process that modulates the frequency, rate or extent of development, the biological process whose specific outcome is the progression of a multicellular organism over time from an initial condition (e.g. a zygote, or a young adult) to a later condition (e.g. a multicellular animal or an aged adult). [GOC:go_curators]	5	GO:0030500;GO:0045616;GO:0008360;GO:1904179;GO:0051147	5	I3LT15;K7GKY0;I3LH80;C9E1C9;G9BWQ2	I3LT15(GO:0030500);K7GKY0(GO:0045616);I3LH80(GO:0008360);C9E1C9(GO:0051147);G9BWQ2(GO:1904179)
GO:0050790	4	4	regulation of catalytic activity	biological_process	Any process that modulates the activity of an enzyme. [GOC:ai, GOC:ebc, GOC:vw]	8	GO:0043547;GO:2000117;GO:0000079;GO:0050790;GO:0010466;GO:0045737;GO:0051438;GO:0010951	6	Q0Z8R0;I3LT15;K7GKY0;F1S6I1;F6Q8T7;F1SED4	Q0Z8R0(GO:0010466;GO:2000117);I3LT15(GO:0050790);K7GKY0(GO:0010951);F1S6I1(GO:0051438);F6Q8T7(GO:0000079;GO:0045737);F1SED4(GO:0043547)
GO:0050794	4	4	regulation of cellular process	biological_process	Any process that modulates the frequency, rate or extent of a cellular process, any of those that are carried out at the cellular level, but are not necessarily restricted to a single cell. For example, cell communication occurs among more than one cell, but occurs at the cellular level. [GOC:go_curators]	47	GO:2000369;GO:0008589;GO:0043923;GO:0034157;GO:0050680;GO:0051438;GO:0051147;GO:0031056;GO:0035556;GO:0042981;GO:0007219;GO:0050709;GO:1900364;GO:0030100;GO:0043065;GO:0045747;GO:0006357;GO:0045737;GO:0010506;GO:0043068;GO:0071157;GO:2001168;GO:0006282;GO:0045880;GO:0033129;GO:0001933;GO:0008360;GO:0034165;GO:0010951;GO:0007263;GO:0030512;GO:0010839;GO:2000117;GO:0070940;GO:0030968;GO:0007224;GO:…	24	I3LPC6;F1RP31;I3LF05;F1RWS7;Q0Z8R0;F1RU26;F1S9L2;F1SJG5;K7GKY0;F1S6I1;F1SED4;C9E1C9;I3LT15;P79379;F1RXZ6;F6Q8T7;F1RUL8;I3LM88;F1SG36;F1SUE6;G9BWQ2;F1RP50;I3LDJ9;I3LH80	I3LPC6(GO:0007219;GO:0007224;GO:0008589;GO:0045880;GO:0050680);F1RP31(GO:0006355;GO:0006355;GO:0045944);I3LF05(GO:0010506;GO:0032008);F1RWS7(GO:0043923;GO:0070940);Q0Z8R0(GO:0010466;GO:2000117);F1RU26(GO:0006355;GO:0006357;GO:2000144);F1S9L2(GO:0034157;GO:0034165;GO:0050709);F1SJG5(GO:0006355);K7GKY0(GO:0001933;GO:0010839;GO:0010951;GO:0030512;GO:0045616);F1S6I1(GO:0051438);F1SED4(GO:0003400);C9E…
GO:0072593	4	4	reactive oxygen species metabolic process	biological_process	The chemical reactions and pathways involving a reactive oxygen species, any molecules or ions formed by the incomplete one-electron reduction of oxygen. They contribute to the microbicidal activity of phagocytes, regulation of signal transduction and gene expression, and the oxidative damage to biopolymers. [CHEBI:26523, GOC:mah]	2	GO:0019430;GO:0006801	1	I3LUD1	I3LUD1(GO:0006801;GO:0019430)
GO:0098609	4	4	cell-cell adhesion	biological_process	The attachment of one cell to another cell via adhesion molecules. [GOC:dos]	1	GO:0007156	1	F1SP42	F1SP42(GO:0007156)
GO:0006139	4	5	nucleobase-containing compound metabolic process	biological_process	Any cellular metabolic process involving nucleobases, nucleosides, nucleotides and nucleic acids. [GOC:ai]	19	GO:0016180;GO:0090502;GO:0006351;GO:0031167;GO:0006281;GO:0000154;GO:0030490;GO:0006289;GO:0006228;GO:0006241;GO:0061614;GO:0006364;GO:0006165;GO:0006366;GO:0006368;GO:0010501;GO:0031297;GO:0006183;GO:0097359	13	F1RPV8;C9E1C9;F1RP31;F1RFL5;F1SBX8;F1RFZ6;F1SNA6;F1RP50;F1RHJ0;F6Q8T7;I3LM88;F1RU26;F1STY6	F1RPV8(GO:0006165;GO:0006183;GO:0006228;GO:0006241);C9E1C9(GO:0006368;GO:0031297);F1RP31(GO:0006351;GO:0006351);F1RFL5(GO:0010501);F1SBX8(GO:0090502);F1RFZ6(GO:0006364;GO:0006364;GO:0030490);F1SNA6(GO:0006281;GO:0006281);F1RP50(GO:0097359);F1RHJ0(GO:0000154;GO:0031167);F6Q8T7(GO:0006281;GO:0006289;GO:0006366);I3LM88(GO:0006366);F1RU26(GO:0061614);F1STY6(GO:0016180)
GO:1901698	4	4	response to nitrogen compound	biological_process	Any process that results in a change in state or activity of a cell or an organism (in terms of movement, secretion, enzyme production, gene expression, etc.) as a result of a nitrogen compound stimulus. [GOC:pr, GOC:TermGenie]	1	GO:0071712	1	F1RP50	F1RP50(GO:0071712)
GO:0042592	4	4	homeostatic process	biological_process	Any biological process involved in the maintenance of an internal steady state. [GOC:jl, ISBN:0395825172]	2	GO:0051480;GO:0006882	2	P79379;Q06A97	P79379(GO:0006882);Q06A97(GO:0051480)
GO:0042594	4	6	response to starvation	biological_process	Any process that results in a change in state or activity of a cell or an organism (in terms of movement, secretion, enzyme production, gene expression, etc.) as a result of a starvation stimulus, deprivation of nourishment. [GOC:go_curators]	1	GO:0034198	1	I3LF05	I3LF05(GO:0034198)
GO:0032879	4	4	regulation of localization	biological_process	Any process that modulates the frequency, rate or extent of any process in which a cell, a substance, or a cellular entity is transported to, or maintained in, a specific location. [GOC:mah]	5	GO:2000369;GO:1901253;GO:0003400;GO:0030100;GO:0050709	5	I3LT15;K7GKN2;F1RXZ6;F1SED4;F1S9L2	I3LT15(GO:2000369);K7GKN2(GO:1901253);F1RXZ6(GO:0030100);F1SED4(GO:0003400);F1S9L2(GO:0050709)
GO:0004693	4	8	cyclin-dependent protein serine/threonine kinase activity	molecular_function	Catalysis of the reactions: ATP + protein serine = ADP + protein serine phosphate, and ATP + protein threonine = ADP + protein threonine phosphate. This reaction requires the binding of a regulatory cyclin subunit and full activity requires stimulatory phosphorylation by a CDK-activating kinase (CAK). [GOC:pr, GOC:rn, PMID:7877684, PMID:9841670]	1	GO:0004693	1	C9E1C9	C9E1C9(GO:0004693;GO:0004693)
GO:0007276	4	4	gamete generation	biological_process	The generation and maintenance of gametes in a multicellular organism. A gamete is a haploid reproductive cell. [GOC:ems, GOC:mtg_sensu]	1	GO:0007283	1	F1RNN4	F1RNN4(GO:0007283)
GO:0016021	4	4	integral component of membrane	cellular_component	The component of a membrane consisting of the gene products and protein complexes having at least some part of their peptide sequence embedded in the hydrophobic region of the membrane. [GOC:dos, GOC:go_curators]	4	GO:0071458;GO:0016021;GO:0030176;GO:0071556	13	F1SA54;K7GKY0;F1S568;F1S849;F1S8G9;F1RUH9;F1SJ46;I3LDJ9;F1S5K2;F1SKZ6;F1SED4;F1SP42;E7CXS1	F1SA54(GO:0016021;GO:0016021);K7GKY0(GO:0016021);F1S568(GO:0016021;GO:0016021);F1S849(GO:0016021);F1S8G9(GO:0016021;GO:0016021;GO:0071458;GO:0071556);F1RUH9(GO:0016021);F1SJ46(GO:0016021;GO:0016021);I3LDJ9(GO:0016021;GO:0016021);F1S5K2(GO:0016021);F1SKZ6(GO:0016021);F1SED4(GO:0016021;GO:0030176);F1SP42(GO:0016021);E7CXS1(GO:0016021)
GO:0009314	4	4	response to radiation	biological_process	Any process that results in a change in state or activity of a cell or an organism (in terms of movement, secretion, enzyme production, gene expression, etc.) as a result of an electromagnetic radiation stimulus. Electromagnetic radiation is a propagating wave in space with electric and magnetic components. These components oscillate at right angles to each other and to the direction of propagati…	1	GO:0010212	1	F1SNA6	F1SNA6(GO:0010212)
GO:0008047	4	4	enzyme activator activity	molecular_function	Binds to and increases the activity of an enzyme. [GOC:dph, GOC:mah, GOC:tb]	2	GO:0061575;GO:0005096	2	F6Q8T7;F1SED4	F6Q8T7(GO:0061575);F1SED4(GO:0005096)
GO:1901360	4	4	organic cyclic compound metabolic process	biological_process	The chemical reactions and pathways involving organic cyclic compound. [GOC:TermGenie]	19	GO:0016180;GO:0090502;GO:0006351;GO:0031167;GO:0006281;GO:0000154;GO:0030490;GO:0006289;GO:0006228;GO:0006241;GO:0061614;GO:0006364;GO:0006165;GO:0006366;GO:0006368;GO:0010501;GO:0031297;GO:0006183;GO:0097359	13	F1RPV8;C9E1C9;F1RP31;F1RFL5;F1SBX8;F1RFZ6;F1SNA6;F1RP50;F1RHJ0;F6Q8T7;I3LM88;F1RU26;F1STY6	F1RPV8(GO:0006165;GO:0006183;GO:0006228;GO:0006241);C9E1C9(GO:0006368;GO:0031297);F1RP31(GO:0006351;GO:0006351);F1RFL5(GO:0010501);F1SBX8(GO:0090502);F1RFZ6(GO:0006364;GO:0006364;GO:0030490);F1SNA6(GO:0006281;GO:0006281);F1RP50(GO:0097359);F1RHJ0(GO:0000154;GO:0031167);F6Q8T7(GO:0006281;GO:0006289;GO:0006366);I3LM88(GO:0006366);F1RU26(GO:0061614);F1STY6(GO:0016180)
GO:0030154	4	4	cell differentiation	biological_process	The process in which relatively unspecialized cells, e.g. embryonic or regenerative cells, acquire specialized structural and/or functional features that characterize the cells, tissues, or organs of the mature organism or some other relatively stable phase of the organism's life history. Differentiation includes the processes involved in commitment of a cell to a specific fate and its subsequent…	2	GO:0021522;GO:0043367	2	I3LPC6;F1S9L2	I3LPC6(GO:0021522);F1S9L2(GO:0043367)
GO:0043005	4	5	neuron projection	cellular_component	A prolongation or process extending from a nerve cell, e.g. an axon or dendrite. [GOC:jl, http://www.cogsci.princeton.edu/~wn/]	1	GO:0043005	1	Q06A97	Q06A97(GO:0043005)
GO:0034641	4	4	cellular nitrogen compound metabolic process	biological_process	The chemical reactions and pathways involving various organic and inorganic nitrogenous compounds, as carried out by individual cells. [GOC:mah]	20	GO:0016180;GO:0090502;GO:0006351;GO:0031167;GO:0006281;GO:0000154;GO:0030490;GO:0006289;GO:0006228;GO:0006241;GO:0061614;GO:0006364;GO:0006165;GO:0006366;GO:0006368;GO:0010501;GO:0031297;GO:0006412;GO:0006183;GO:0097359	14	F1RPV8;I3LTC4;C9E1C9;F1RP31;F1RFL5;F1SBX8;F1RFZ6;F1SNA6;F1RP50;F1RHJ0;F6Q8T7;I3LM88;F1RU26;F1STY6	F1RPV8(GO:0006165;GO:0006183;GO:0006228;GO:0006241);I3LTC4(GO:0006412);C9E1C9(GO:0006368;GO:0031297);F1RP31(GO:0006351;GO:0006351);F1RFL5(GO:0010501);F1SBX8(GO:0090502);F1RFZ6(GO:0006364;GO:0006364;GO:0030490);F1SNA6(GO:0006281;GO:0006281);F1RP50(GO:0097359);F1RHJ0(GO:0000154;GO:0031167);F6Q8T7(GO:0006281;GO:0006289;GO:0006366);I3LM88(GO:0006366);F1RU26(GO:0061614);F1STY6(GO:0016180)
GO:0016788	4	4	hydrolase activity, acting on ester bonds	molecular_function	Catalysis of the hydrolysis of any ester bond. [GOC:jl]	2	GO:0033897;GO:0008420	2	F1SBX8;F1RWS7	F1SBX8(GO:0033897);F1RWS7(GO:0008420;GO:0008420)
GO:0045087	4	5	innate immune response	biological_process	Innate immune responses are defense responses mediated by germline encoded components that directly recognize components of potential pathogens. [GO_REF:0000022, GOC:add, GOC:ebc, GOC:mtg_15nov05, GOC:mtg_sensu]	1	GO:0045087	1	K7GKN2	K7GKN2(GO:0045087)
GO:0036065	4	4	fucosylation	biological_process	The covalent attachment of a fucosyl group to an acceptor molecule. [CHEBI:62688, GOC:sart, PMID:19948734]	1	GO:0036071	1	F1SA54	F1SA54(GO:0036071)
GO:0036064	4	7	ciliary basal body	cellular_component	A membrane-tethered, short cylindrical array of microtubules and associated proteins found at the base of a eukaryotic cilium (also called flagellum) that is similar in structure to a centriole and derives from it. The cilium basal body is the site of assembly and remodelling of the cilium and serves as a nucleation site for axoneme growth. As well as anchoring the cilium, it is thought to provid…	1	GO:0036064	2	F1RNN4;I3LPC6	F1RNN4(GO:0036064);I3LPC6(GO:0036064)
GO:0022405	4	4	hair cycle process	biological_process	A multicellular organismal process involved in the cyclical phases of growth (anagen), regression (catagen), quiescence (telogen), and shedding (exogen) in the life of a hair; one of the collection or mass of filaments growing from the skin of an animal, and forming a covering for a part of the head or for any part or the whole of the body. [GOC:isa_complete]	1	GO:0001942	1	K7GKY0	K7GKY0(GO:0001942)
GO:0007166	4	6	cell surface receptor signaling pathway	biological_process	A series of molecular signals initiated by activation of a receptor on the surface of a cell. The pathway begins with binding of an extracellular ligand to a cell surface receptor, or for receptors that signal in the absence of a ligand, by ligand-withdrawal or the activity of a constitutively active receptor. The pathway ends with regulation of a downstream cellular process, e.g. transcription. …	2	GO:0007219;GO:0007224	1	I3LPC6	I3LPC6(GO:0007219;GO:0007224)
GO:0006793	4	4	phosphorus metabolic process	biological_process	The chemical reactions and pathways involving the nonmetallic element phosphorus or compounds that contain phosphorus, usually in the form of a phosphate group (PO4). [GOC:ai]	11	GO:0006468;GO:0018105;GO:0070940;GO:0006228;GO:0006470;GO:0070816;GO:0006241;GO:0006165;GO:0016310;GO:0006183;GO:0097359	7	F1RPV8;C9E1C9;I3LT15;G9BWQ2;F1RWS7;F1RP50;F6Q8T7	F1RPV8(GO:0006165;GO:0006183;GO:0006228;GO:0006241);C9E1C9(GO:0006468;GO:0006468;GO:0070816);I3LT15(GO:0006468;GO:0006468);G9BWQ2(GO:0006468;GO:0016310;GO:0018105);F1RWS7(GO:0006470;GO:0070940);F1RP50(GO:0097359);F6Q8T7(GO:0006468)
GO:0001568	4	4	blood vessel development	biological_process	The process whose specific outcome is the progression of a blood vessel over time, from its formation to the mature structure. The blood vessel is the vasculature carrying blood. [GOC:hjd, UBERON:0001981]	1	GO:0060674	1	F1RU26	F1RU26(GO:0060674)
GO:0031982	4	4	vesicle	cellular_component	Any small, fluid-filled, spherical organelle enclosed by membrane. [GOC:mah, GOC:pz, GOC:vesicles]	4	GO:0097598;GO:0031410;GO:1903561;GO:0070062	3	F1S5K2;I3LPC6;Q06A97	F1S5K2(GO:0070062);I3LPC6(GO:0097598;GO:1903561);Q06A97(GO:0031410)
GO:0006458	4	4	'de novo' protein folding	biological_process	The process of assisting in the folding of a nascent peptide chain into its correct tertiary structure. [GOC:mb]	1	GO:0051084	1	F1RP50	F1RP50(GO:0051084)
GO:0003002	4	4	regionalization	biological_process	The pattern specification process that results in the subdivision of an axis or axes in space to define an area or volume in which specific patterns of cell differentiation will take place or in which cells interpret a specific environment. [GOC:dph, GOC:isa_complete]	1	GO:0009953	1	I3LPC6	I3LPC6(GO:0009953)
GO:0044444	4	4	cytoplasmic part	cellular_component	Any constituent part of the cytoplasm, all of the contents of a cell excluding the plasma membrane and nucleus, but including other subcellular structures. [GOC:jl]	22	GO:0015934;GO:0005783;GO:0005789;GO:0030176;GO:0036464;GO:0030660;GO:0005743;GO:0031410;GO:0005777;GO:0005739;GO:0071556;GO:0071458;GO:0048471;GO:0005794;GO:0031966;GO:0030658;GO:0032580;GO:0005829;GO:0005765;GO:0005740;GO:0005741;GO:0005762	18	F1SLA2;F1SA54;I3LTC4;C9E1C9;F1SJQ4;F1RFL5;P79379;F1SUE6;F1S9L2;F1S8G9;K7GKN2;F1RP50;F6Q8T7;Q06A97;I3LF05;I3LDJ9;F1S5K2;F1SED4	F1SLA2(GO:0005829);F1SA54(GO:0005794;GO:0032580;GO:0032580);I3LTC4(GO:0005743;GO:0005762;GO:0015934);C9E1C9(GO:0036464;GO:0036464);F1SJQ4(GO:0036464);F1RFL5(GO:0005829;GO:0005829);P79379(GO:0048471);F1SUE6(GO:0005777;GO:0005777);F1S9L2(GO:0005739;GO:0005741;GO:0005743;GO:0005783;GO:0005783;GO:0005789;GO:0005789);F1S8G9(GO:0005765;GO:0030660;GO:0071458;GO:0071556);K7GKN2(GO:0005829;GO:0031966;GO:0…
GO:0044249	4	4	cellular biosynthetic process	biological_process	The chemical reactions and pathways resulting in the formation of substances, carried out by individual cells. [GOC:jl]	8	GO:0006228;GO:0006241;GO:0061614;GO:0006351;GO:0006366;GO:0006368;GO:0006412;GO:0006183	7	F1RPV8;I3LTC4;C9E1C9;F1RP31;F1RU26;F6Q8T7;I3LM88	F1RPV8(GO:0006183;GO:0006228;GO:0006241);I3LTC4(GO:0006412);C9E1C9(GO:0006368);F1RP31(GO:0006351;GO:0006351);F1RU26(GO:0061614);F6Q8T7(GO:0006366);I3LM88(GO:0006366)
GO:0005774	4	6	vacuolar membrane	cellular_component	The lipid bilayer surrounding the vacuole and separating its contents from the cytoplasm of the cell. [GOC:ai]	1	GO:0005765	2	F1S8G9;I3LF05	F1S8G9(GO:0005765);I3LF05(GO:0005765)
GO:0006952	4	4	defense response	biological_process	Reactions, triggered in response to the presence of a foreign body or the occurrence of an injury, which result in restriction of damage to the organism attacked or prevention/recovery from the infection caused by the attack. [GOC:go_curators]	2	GO:0045087;GO:0051607	4	K7GKN2;K7GN56;F1SCY2;F1S9L2	K7GKN2(GO:0045087;GO:0051607;GO:0051607;GO:0051607);K7GN56(GO:0051607);F1SCY2(GO:0051607);F1S9L2(GO:0051607;GO:0051607;GO:0051607)
GO:0019787	4	4	ubiquitin-like protein transferase activity	molecular_function	Catalysis of the transfer of a ubiquitin-like from one protein to another via the reaction X-ULP + Y --> Y-ULP + X, where both X-ULP and Y-ULP are covalent linkages. ULP represents a ubiquitin-like protein. [GOC:mah, GOC:rn, PMID:10806345, PMID:10884686]	1	GO:0004842	1	F1S6I1	F1S6I1(GO:0004842)
GO:0051649	4	4	establishment of localization in cell	biological_process	Any process, occuring in a cell, that localizes a substance or cellular component. This may occur via movement, tethering or selective degradation. [GOC:ai, GOC:dos, GOC:dph, GOC:tb]	4	GO:0042073;GO:0035735;GO:0006406;GO:0016973	2	F1RNN4;F1SJQ4	F1RNN4(GO:0035735;GO:0042073;GO:0042073);F1SJQ4(GO:0006406;GO:0016973)
GO:0051640	4	4	organelle localization	biological_process	Any process in which an organelle is transported to, and/or maintained in, a specific location. [GOC:ai]	1	GO:0032439	1	K7GKN2	K7GKN2(GO:0032439)
GO:0004857	4	4	enzyme inhibitor activity	molecular_function	Binds to and stops, prevents or reduces the activity of an enzyme. [GOC:ai, GOC:ebc]	3	GO:0004869;GO:0030414;GO:0004866	2	K7GKY0;Q0Z8R0	K7GKY0(GO:0004866);Q0Z8R0(GO:0004869;GO:0004869;GO:0004869;GO:0030414)
GO:0035148	4	4	tube formation	biological_process	Creation of the central hole of a tube in an anatomical structure through which gases and/or liquids flow. [GOC:bf]	2	GO:0001841;GO:0001843	1	I3LPC6	I3LPC6(GO:0001841;GO:0001843)
GO:0043170	4	4	macromolecule metabolic process	biological_process	The chemical reactions and pathways involving macromolecules, any molecule of high relative molecular mass, the structure of which essentially comprises the multiple repetition of units derived, actually or conceptually, from molecules of low relative molecular mass. [CHEBI:33694, GOC:mah]	29	GO:0018105;GO:0006470;GO:0016180;GO:0006486;GO:0070979;GO:0006364;GO:0006366;GO:0031293;GO:0006368;GO:0010501;GO:0031297;GO:0018279;GO:0006468;GO:0006281;GO:0006289;GO:0031167;GO:0006508;GO:0016485;GO:0061614;GO:0090502;GO:0070940;GO:0000154;GO:0030490;GO:0070816;GO:0016567;GO:0071712;GO:0006351;GO:0033578;GO:0006412	22	I3LPC6;F1RP31;F1RFL5;I3L7Q8;F1RWS7;F1RHJ0;F1SA54;I3LTC4;F1RU26;F1S6I1;C9E1C9;I3LT15;F1RFZ6;F1SNA6;F1STY6;F6Q8T7;I3LM88;F1SBX8;F1SUE6;G9BWQ2;F1S8G9;F1RP50	I3LPC6(GO:0016485);F1RP31(GO:0006351;GO:0006351);F1RFL5(GO:0010501);I3L7Q8(GO:0070979);F1RWS7(GO:0006470;GO:0070940);F1RHJ0(GO:0000154;GO:0031167);F1SA54(GO:0006486;GO:0033578);I3LTC4(GO:0006412);F1RU26(GO:0061614);F1S6I1(GO:0016567);C9E1C9(GO:0006368;GO:0006468;GO:0006468;GO:0031297;GO:0070816);I3LT15(GO:0006468;GO:0006468);F1RFZ6(GO:0006364;GO:0006364;GO:0030490);F1SNA6(GO:0006281;GO:0006281);F…
GO:0051239	4	4	regulation of multicellular organismal process	biological_process	Any process that modulates the frequency, rate or extent of a multicellular organismal process, the processes pertinent to the function of a multicellular organism above the cellular level; includes the integrated processes of tissues and organs. [GOC:ai, GOC:dph, GOC:tb]	4	GO:0030500;GO:0045616;GO:2000553;GO:1904179	4	I3LT15;K7GKY0;G9BWQ2;F1S9L2	I3LT15(GO:0030500);K7GKY0(GO:0045616);G9BWQ2(GO:1904179);F1S9L2(GO:2000553)
GO:0051236	4	4	establishment of RNA localization	biological_process	The directed movement of RNA to a specific location. [GOC:ai]	2	GO:0016973;GO:0006406	1	F1SJQ4	F1SJQ4(GO:0006406;GO:0016973)
GO:0001942	4	5	hair follicle development	biological_process	The process whose specific outcome is the progression of the hair follicle over time, from its formation to the mature structure. A hair follicle is a tube-like opening in the epidermis where the hair shaft develops and into which the sebaceous glands open. [GOC:dph, UBERON:0002073]	1	GO:0001942	1	K7GKY0	K7GKY0(GO:0001942)
GO:0008092	4	4	cytoskeletal protein binding	molecular_function	Interacting selectively and non-covalently with any protein component of any cytoskeleton (actin, microtubule, or intermediate filament cytoskeleton). [GOC:mah]	3	GO:0003779;GO:0015631;GO:0008017	4	I3LH80;F1RNN4;Q767M0;K7GKN2	I3LH80(GO:0003779);F1RNN4(GO:0015631;GO:0015631;GO:0015631);Q767M0(GO:0003779);K7GKN2(GO:0008017)
GO:0140102	4	4	catalytic activity, acting on a rRNA	molecular_function	Catalytic activity that acts to modify a ribosomal RNA. [GOC:pg]	2	GO:0000179;GO:0008649	1	F1RHJ0	F1RHJ0(GO:0000179;GO:0008649)
GO:0140103	4	4	catalytic activity, acting on a glycoprotein	molecular_function	catalytic activity, acting on a glycosylated protein [GOC:pg]	1	GO:0008424	1	F1SA54	F1SA54(GO:0008424;GO:0008424)
GO:0001098	4	4	basal transcription machinery binding	molecular_function	Interacting selectively and non-covalently with the basal transcription machinery which is composed of the RNA polymerase core enzyme and the basal transcription factor(s), the minimal set of factors required for formation of the preinitiation complex (PIC) by the RNA polymerase. [GOC:txnOH]	1	GO:0001096	1	F1RWS7	F1RWS7(GO:0001096)
GO:0070887	4	4	cellular response to chemical stimulus	biological_process	Any process that results in a change in state or activity of a cell (in terms of movement, secretion, enzyme production, gene expression, etc.) as a result of a chemical stimulus. [GOC:mah]	4	GO:0071345;GO:0071357;GO:0071294;GO:0035457	4	P79379;K7GKN2;C9E1C9;F1SCY2	P79379(GO:0071294);K7GKN2(GO:0071357);C9E1C9(GO:0071345);F1SCY2(GO:0035457)
GO:0031668	4	5	cellular response to extracellular stimulus	biological_process	Any process that results in a change in state or activity of a cell (in terms of movement, secretion, enzyme production, gene expression, etc.) as a result of an extracellular stimulus. [GOC:mah]	2	GO:0031668;GO:0034198	2	I3LF05;F1RU26	I3LF05(GO:0034198);F1RU26(GO:0031668)
GO:0046983	4	4	protein dimerization activity	molecular_function	The formation of a protein dimer, a macromolecular structure consists of two noncovalently associated identical or nonidentical subunits. [ISBN:0198506732]	2	GO:0046983;GO:0046982	3	F1SG36;Q767M0;F1RP31	F1SG36(GO:0046982);Q767M0(GO:0046983);F1RP31(GO:0046983)
GO:0019955	4	4	cytokine binding	molecular_function	Interacting selectively and non-covalently with a cytokine, any of a group of proteins that function to control the survival, growth and differentiation of tissues and cells, and which have autocrine and paracrine activity. [GOC:ai, GOC:bf, ISBN:0198599471]	1	GO:0050431	1	K7GKY0	K7GKY0(GO:0050431)
GO:0033186	4	4	CAF-1 complex	cellular_component	A conserved heterotrimeric protein complex that promotes histone H3 and H4 deposition onto newly synthesized DNA during replication or DNA repair; specifically facilitates replication-dependent nucleosome assembly with the major histone H3 (H3.1). In many species the CAF-1 subunits are designated p150, p60, and p48. [PMID:17065558, PMID:17083276]	1	GO:0033186	1	F1S7L7	F1S7L7(GO:0033186;GO:0033186)
GO:1990234	4	4	transferase complex	cellular_component	A protein complex capable of catalyzing the transfer of a group, e.g. a methyl group, glycosyl group, acyl group, phosphorus-containing, or other groups, from one compound (generally regarded as the donor) to another compound (generally regarded as the acceptor). [GOC:bhm, PMID:16540464]	5	GO:0016591;GO:0005680;GO:0008024;GO:0031462;GO:0005675	5	F1S6I1;F1RWS7;C9E1C9;F6Q8T7;I3L7Q8	F1S6I1(GO:0031462);F1RWS7(GO:0016591);C9E1C9(GO:0008024;GO:0008024;GO:0008024);F6Q8T7(GO:0005675;GO:0005675;GO:0005675);I3L7Q8(GO:0005680)
GO:0031253	4	5	cell projection membrane	cellular_component	The portion of the plasma membrane surrounding a plasma membrane bounded cell surface projection. [GOC:mah] {comment="GOC:krc"}	1	GO:0031526	1	F1S5K2	F1S5K2(GO:0031526;GO:0031526)
GO:0016757	4	4	transferase activity, transferring glycosyl groups	molecular_function	Catalysis of the transfer of a glycosyl group from one compound (donor) to another (acceptor). [GOC:jl, ISBN:0198506732]	3	GO:0008424;GO:0016757;GO:0003980	3	F1SA54;F1S568;F1RP50	F1SA54(GO:0008424;GO:0008424;GO:0016757);F1S568(GO:0016757);F1RP50(GO:0003980;GO:0003980)
GO:0012506	4	4	vesicle membrane	cellular_component	The lipid bilayer surrounding any membrane-bounded vesicle in the cell. [GOC:mah, GOC:vesicle]	1	GO:0030658	1	Q06A97	Q06A97(GO:0030658)
GO:0019866	4	4	organelle inner membrane	cellular_component	The inner, i.e. lumen-facing, lipid bilayer of an organelle envelope; usually highly selective to most ions and metabolites. [GOC:mah]	1	GO:0005743	3	F1S5K2;I3LTC4;F1S9L2	F1S5K2(GO:0005743);I3LTC4(GO:0005743);F1S9L2(GO:0005743)
GO:0060021	4	4	palate development	biological_process	The biological process whose specific outcome is the progression of the palate from an initial condition to its mature state. This process begins with the formation of the structure and ends with the mature structure. The palate is the partition that separates the nasal and oral cavities. [GOC:dph, ISBN:0721662544]	1	GO:0060021	1	I3LPC6	I3LPC6(GO:0060021)
GO:0000151	4	5	ubiquitin ligase complex	cellular_component	A protein complex that includes a ubiquitin-protein ligase and enables ubiquitin protein ligase activity. The complex also contains other proteins that may confer substrate specificity on the complex. [GOC:jh2, PMID:9529603]	2	GO:0031462;GO:0005680	2	F1S6I1;I3L7Q8	F1S6I1(GO:0031462);I3L7Q8(GO:0005680)
GO:0007018	4	4	microtubule-based movement	biological_process	A microtubule-based process that results in the movement of organelles, other microtubules, or other cellular components. Examples include motor-driven movement along microtubules and movement driven by polymerization or depolymerization of microtubules. [GOC:cjm, ISBN:0815316194]	2	GO:0035735;GO:0042073	1	F1RNN4	F1RNN4(GO:0035735;GO:0042073;GO:0042073)
GO:0033554	4	4	cellular response to stress	biological_process	Any process that results in a change in state or activity of a cell (in terms of movement, secretion, enzyme production, gene expression, etc.) as a result of a stimulus indicating the organism is under stress. The stress is usually, but not necessarily, exogenous (e.g. temperature, humidity, ionizing radiation). [GOC:mah]	6	GO:0030968;GO:0006281;GO:0006289;GO:0006974;GO:0071712;GO:0034198	4	I3LF05;F6Q8T7;F1SNA6;F1RP50	I3LF05(GO:0034198);F6Q8T7(GO:0006281;GO:0006289);F1SNA6(GO:0006281;GO:0006281;GO:0006974;GO:0006974);F1RP50(GO:0030968;GO:0071712)
GO:0035556	4	6	intracellular signal transduction	biological_process	The process in which a signal is passed on to downstream components within the cell, which become activated themselves to further propagate the signal and finally trigger a change in the function or state of the cell. [GOC:bf, GOC:jl, GOC:signaling, ISBN:3527303782]	2	GO:0035556;GO:0007263	2	P79379;G9BWQ2	P79379(GO:0007263);G9BWQ2(GO:0035556)
GO:0004672	4	6	protein kinase activity	molecular_function	Catalysis of the phosphorylation of an amino acid residue in a protein, usually according to the reaction: a protein + ATP = a phosphoprotein + ADP. [MetaCyc:PROTEIN-KINASE-RXN]	4	GO:0004693;GO:0008353;GO:0004672;GO:0004674	4	I3LT15;F6Q8T7;C9E1C9;G9BWQ2	I3LT15(GO:0004672;GO:0004674);F6Q8T7(GO:0008353);C9E1C9(GO:0004672;GO:0004674;GO:0004693;GO:0004693;GO:0008353;GO:0008353;GO:0008353);G9BWQ2(GO:0004672;GO:0004674;GO:0004674;GO:0004674)
GO:0048513	4	4	animal organ development	biological_process	Development of a tissue or tissues that work together to perform a specific function or functions. Development pertains to the process whose specific outcome is the progression of a structure over time, from its formation to the mature structure. Organs are commonly observed as visibly distinct structures, but may also exist as loosely associated clusters of cells that work together to perform a …	4	GO:0007507;GO:0060348;GO:0007420;GO:0007512	2	F6Q8T7;I3LPC6	F6Q8T7(GO:0007512);I3LPC6(GO:0007420;GO:0007507;GO:0060348)
GO:0031968	4	5	organelle outer membrane	cellular_component	The outer, i.e. cytoplasm-facing in a cellular organelle, lipid bilayer of an organelle envelope. [GOC:mah]	1	GO:0005741	2	I3LDJ9;F1S9L2	I3LDJ9(GO:0005741);F1S9L2(GO:0005741)
GO:0031965	4	6	nuclear membrane	cellular_component	Either of the lipid bilayers that surround the nucleus and form the nuclear envelope; excludes the intermembrane space. [GOC:mah, GOC:pz]	1	GO:0031965	1	K7GKN2	K7GKN2(GO:0031965)
GO:0031967	4	5	organelle envelope	cellular_component	A double membrane structure enclosing an organelle, including two lipid bilayers and the region between them. In some cases, an organelle envelope may have more than two membranes. [GOC:mah, GOC:pz]	2	GO:0005740;GO:0005635	1	I3LDJ9	I3LDJ9(GO:0005635;GO:0005740)
GO:0031966	4	6	mitochondrial membrane	cellular_component	Either of the lipid bilayers that surround the mitochondrion and form the mitochondrial envelope. [GOC:mah, NIF_Subcellular:sao1045389829]	3	GO:0005743;GO:0005741;GO:0031966	5	I3LDJ9;F1S5K2;I3LTC4;K7GKN2;F1S9L2	I3LDJ9(GO:0005741);F1S5K2(GO:0005743);I3LTC4(GO:0005743);K7GKN2(GO:0031966);F1S9L2(GO:0005741;GO:0005743)
GO:0005667	4	4	transcription factor complex	cellular_component	A protein complex that is capable of associating with DNA by direct binding, or via other DNA-binding proteins or complexes, and regulating transcription. [GOC:jl]	1	GO:0005675	1	F6Q8T7	F6Q8T7(GO:0005675;GO:0005675;GO:0005675)
GO:0008233	4	4	peptidase activity	molecular_function	Catalysis of the hydrolysis of a peptide bond. A peptide bond is a covalent bond formed when the carbon atom from the carboxyl group of one amino acid shares electrons with the nitrogen atom from the amino group of a second amino acid. [GOC:jl, ISBN:0815332181]	3	GO:0004252;GO:0004190;GO:0042500	2	F1S8G9;F1SUE6	F1S8G9(GO:0004190;GO:0042500);F1SUE6(GO:0004252;GO:0004252)
GO:0098542	4	6	defense response to other organism	biological_process	Reactions triggered in response to the presence of another organism that act to protect the cell or organism from damage caused by that organism. [GOC:dos]	1	GO:0051607	4	K7GN56;K7GKN2;F1SCY2;F1S9L2	K7GN56(GO:0051607);K7GKN2(GO:0051607;GO:0051607;GO:0051607);F1SCY2(GO:0051607);F1S9L2(GO:0051607;GO:0051607;GO:0051607)
GO:0043231	4	5	intracellular membrane-bounded organelle	cellular_component	Organized structure of distinctive morphology and function, bounded by a single or double lipid bilayer membrane and occurring within the cell. Includes the nucleus, mitochondria, plastids, vacuoles, and vesicles. Excludes the plasma membrane. [GOC:go_curators]	5	GO:0005794;GO:0005634;GO:0005777;GO:0005783;GO:0005739	21	F1SLA2;C9E1C9;F1RP31;F1SG36;P79379;F1RU26;F1SEA5;F1SUE6;F1SJG5;I3L7Q8;F1S9L2;F1SRJ4;F1RWS7;F1SNA6;F1RP50;Q06A97;I3LDJ9;F1S7L7;F1SA54;F1RFL5;I3LM88	F1SLA2(GO:0005634);C9E1C9(GO:0005634);F1RP31(GO:0005634;GO:0005634;GO:0005634);F1SG36(GO:0005634);P79379(GO:0005634);F1RU26(GO:0005634);F1SEA5(GO:0005634);F1SUE6(GO:0005777;GO:0005777);F1SJG5(GO:0005634);I3L7Q8(GO:0005634);F1S9L2(GO:0005739;GO:0005783;GO:0005783);F1SRJ4(GO:0005634);F1RWS7(GO:0005634);F1SNA6(GO:0005634;GO:0005634);F1RP50(GO:0005783);Q06A97(GO:0005634);I3LDJ9(GO:0005783);F1S7L7(GO:…
GO:0043232	4	5	intracellular non-membrane-bounded organelle	cellular_component	Organized structure of distinctive morphology and function, not bounded by a lipid bilayer membrane and occurring within the cell. Includes ribosomes, the cytoskeleton and chromosomes. [GOC:go_curators]	8	GO:0005856;GO:0005819;GO:0015629;GO:0005730;GO:0005811;GO:0036464;GO:0005694;GO:0000776	7	C9E1C9;F1SJQ4;F1RFL5;F1S9L2;F1SRJ4;F1RWS7;Q767M0	C9E1C9(GO:0005694;GO:0036464;GO:0036464);F1SJQ4(GO:0036464);F1RFL5(GO:0005730;GO:0005730;GO:0005730);F1S9L2(GO:0005811;GO:0005811);F1SRJ4(GO:0000776);F1RWS7(GO:0005819;GO:0015629);Q767M0(GO:0005856;GO:0005856)
GO:0019904	4	4	protein domain specific binding	molecular_function	Interacting selectively and non-covalently with a specific domain of a protein. [GOC:go_curators]	1	GO:0070087	1	F1S7L7	F1S7L7(GO:0070087)
GO:0007296	4	5	vitellogenesis	biological_process	The production of yolk. Yolk is a mixture of materials used for embryonic nutrition. [GOC:dph, ISBN:0879694238]	1	GO:0007296	1	F1RU26	F1RU26(GO:0007296)
GO:0097228	4	6	sperm principal piece	cellular_component	The segment of the sperm flagellum where the mitochondrial sheath ends, and the outer dense fibers (ODFs) associated with outer axonemal doublets 3 and 8 are replaced by the 2 longitudinal columns of the fibrous sheath (FS) which run the length of the principal piece and are stabilized by circumferential ribs. The principal piece makes up ~2/3 of the length of the sperm flagellum and is defined b…	1	GO:0097228	2	F1RNN4;I3LPC6	F1RNN4(GO:0097228);I3LPC6(GO:0097228)
GO:0097225	4	6	sperm midpiece	cellular_component	The highly organized segment of the sperm flagellum which begins at the connecting piece and is characterized by the presence of 9 outer dense fibers (ODFs) that lie outside each of the 9 outer axonemal microtubule doublets and by a sheath of mitochondria that encloses the ODFs and the axoneme; the midpiece terminates about one-fourth of the way down the sperm flagellum at the annulus, which mark…	1	GO:0097225	2	F1RNN4;I3LPC6	F1RNN4(GO:0097225);I3LPC6(GO:0097225)
GO:0043621	4	4	protein self-association	molecular_function	Interacting selectively and non-covalently with a domain within the same polypeptide. [GOC:jl]	1	GO:0043621	1	F1S9L2	F1S9L2(GO:0043621)
GO:0016866	4	4	intramolecular transferase activity	molecular_function	Catalysis of the transfer of a functional group from one position to another within a single molecule. [GOC:mah]	1	GO:0016866	1	I3L7C2	I3L7C2(GO:0016866)
GO:0035239	4	4	tube morphogenesis	biological_process	The process in which the anatomical structures of a tube are generated and organized. Epithelial and endothelial tubes transport gases, liquids and cells from one site to another and form the basic structure of many organs and tissues, with tube shape and organization varying from the single-celled excretory organ in Caenorhabditis elegans to the branching trees of the mammalian kidney and insect…	1	GO:0001947	1	I3LPC6	I3LPC6(GO:0001947)
GO:0047485	4	4	protein N-terminus binding	molecular_function	Interacting selectively and non-covalently with a protein N-terminus, the end of any peptide chain at which the 2-amino (or 2-imino) function of a constituent amino acid is not attached in peptide linkage to another amino-acid residue. [ISBN:0198506732]	1	GO:0047485	1	F6Q8T7	F6Q8T7(GO:0047485)
GO:0005975	4	4	carbohydrate metabolic process	biological_process	The chemical reactions and pathways involving carbohydrates, any of a group of organic compounds based of the general formula Cx(H2O)y. Includes the formation of carbohydrate derivatives by the addition of a carbohydrate residue to another molecule. [GOC:mah, ISBN:0198506732]	1	GO:0005975	2	F1SDW4;F1S5K2	F1SDW4(GO:0005975);F1S5K2(GO:0005975)
GO:0030332	4	4	cyclin binding	molecular_function	Interacting selectively and non-covalently with cyclins, proteins whose levels in a cell varies markedly during the cell cycle, rising steadily until mitosis, then falling abruptly to zero. As cyclins reach a threshold level, they are thought to drive cells into G2 phase and thus to mitosis. [GOC:ai]	1	GO:0030332	1	C9E1C9	C9E1C9(GO:0030332)
GO:0022613	4	4	ribonucleoprotein complex biogenesis	biological_process	A cellular process that results in the biosynthesis of constituent macromolecules, assembly, and arrangement of constituent parts of a complex containing RNA and proteins. Includes the biosynthesis of the constituent RNA and protein molecules, and those macromolecular modifications that are involved in synthesis or assembly of the ribonucleoprotein complex. [GOC:isa_complete, GOC:mah]	1	GO:0042254	1	F1RFZ6	F1RFZ6(GO:0042254)
GO:0097708	4	5	intracellular vesicle	cellular_component	Any vesicle that is part of the intracellular region. [GOC:vesicles]	2	GO:0097598;GO:0031410	2	I3LPC6;Q06A97	I3LPC6(GO:0097598);Q06A97(GO:0031410)
GO:0061700	4	4	GATOR2 complex	cellular_component	A multiprotein subcomplex of GATOR that regulates mTOR signaling by interacting with the Rag GTPases. In humans this complex consists of Mios, WDR24, WDR59, Seh1L, Sec13. [GOC:rb, PMID:23723238]	1	GO:0061700	1	I3LF05	I3LF05(GO:0061700)
GO:0120038	4	4	plasma membrane bounded cell projection part	cellular_component	Any constituent part of a plasma membrane bounded cell projection, a prolongation or process extending from a cell, e.g. a cilium or axon. [GOC:krc]	5	GO:0036064;GO:0097225;GO:0005930;GO:0097228;GO:0031526	3	F1S5K2;F1RNN4;I3LPC6	F1S5K2(GO:0031526;GO:0031526);F1RNN4(GO:0036064;GO:0097225;GO:0097228);I3LPC6(GO:0005930;GO:0036064;GO:0097225;GO:0097228)
GO:0097598	4	6	sperm cytoplasmic droplet	cellular_component	A small amount of cytoplasm surrounded by a cell membrane that is generally retained in spermatozoa after spermiogenesis, when the majority of the cytoplasm is phagocytosed by Sertoli cells to produce \residual bodies\". Initially, the droplet is located at the neck just behind the head of an elongated spermatid. During epididymal transit, the cytoplasmic droplet migrates caudally to the annulus …	1	GO:0097598	1	I3LPC6	I3LPC6(GO:0097598)
GO:1901575	4	4	organic substance catabolic process	biological_process	The chemical reactions and pathways resulting in the breakdown of an organic substance, any molecular entity containing carbon. [GOC:pr, GOC:TermGenie]	1	GO:0071712	1	F1RP50	F1RP50(GO:0071712)
GO:0019538	4	5	protein metabolic process	biological_process	The chemical reactions and pathways involving a protein. Includes protein modification. [GOC:ma]	15	GO:0006468;GO:0018105;GO:0070940;GO:0006486;GO:0016567;GO:0070979;GO:0006470;GO:0070816;GO:0006412;GO:0016485;GO:0071712;GO:0031293;GO:0006508;GO:0033578;GO:0018279	13	I3LTC4;C9E1C9;I3LPC6;I3LT15;F1SUE6;G9BWQ2;F1S8G9;F1RWS7;F1RP50;I3L7Q8;F1S6I1;F6Q8T7;F1SA54	I3LTC4(GO:0006412);C9E1C9(GO:0006468;GO:0006468;GO:0070816);I3LPC6(GO:0016485);I3LT15(GO:0006468;GO:0006468);F1SUE6(GO:0006508;GO:0016485;GO:0016485);G9BWQ2(GO:0006468;GO:0018105);F1S8G9(GO:0031293);F1RWS7(GO:0006470;GO:0070940);F1RP50(GO:0006486;GO:0018279;GO:0071712);I3L7Q8(GO:0070979);F1S6I1(GO:0016567);F6Q8T7(GO:0006468);F1SA54(GO:0006486;GO:0033578)
GO:0000981	4	4	RNA polymerase II transcription factor activity, sequence-specific DNA binding	molecular_function	Interacting selectively and non-covalently with a specific DNA sequence in order to modulate transcription by RNA polymerase II. The transcription factor may or may not also interact selectively with a protein or macromolecular complex. [GOC:txnOH]	1	GO:0001077	1	I3LM88	I3LM88(GO:0001077)
GO:0016721	4	4	oxidoreductase activity, acting on superoxide radicals as acceptor	molecular_function	Catalysis of an oxidation-reduction (redox) reaction in which a superoxide radical (O2- or O2.-) acts as a hydrogen or electron acceptor. [GOC:ai]	1	GO:0004784	1	I3LUD1	I3LUD1(GO:0004784;GO:0004784;GO:0004784)
GO:0008360	4	7	regulation of cell shape	biological_process	Any process that modulates the surface configuration of a cell. [GOC:dph, GOC:go_curators, GOC:tb]	1	GO:0008360	1	I3LH80	I3LH80(GO:0008360)
GO:0019838	4	4	growth factor binding	molecular_function	Interacting selectively and non-covalently with any growth factor, proteins or polypeptides that stimulate a cell or organism to grow or proliferate. [GOC:curators]	1	GO:0050431	1	K7GKY0	K7GKY0(GO:0050431)
GO:0032553	4	6	ribonucleotide binding	molecular_function	Interacting selectively and non-covalently with a ribonucleotide, any compound consisting of a ribonucleoside that is esterified with (ortho)phosphate or an oligophosphate at any hydroxyl group on the ribose moiety. [GOC:mah]	2	GO:0005524;GO:0005525	8	C9E1C9;I3LT15;K7GKN2;G9BWQ2;F1RFL5;F1SJG5;I3LFY4;I3LM88	C9E1C9(GO:0005524;GO:0005524);I3LT15(GO:0005524);K7GKN2(GO:0005525;GO:0005525);G9BWQ2(GO:0005524;GO:0005524);F1RFL5(GO:0005524;GO:0005524);F1SJG5(GO:0005524);I3LFY4(GO:0005524);I3LM88(GO:0005524)
GO:0048598	4	4	embryonic morphogenesis	biological_process	The process in which anatomical structures are generated and organized during the embryonic phase. The embryonic phase begins with zygote formation. The end of the embryonic phase is organism-specific. For example, it would be at birth for mammals, larval hatching for insects and seed dormancy in plants. [GOC:jid, GOC:mtg_sensu]	1	GO:0001947	1	I3LPC6	I3LPC6(GO:0001947)
GO:0050839	4	4	cell adhesion molecule binding	molecular_function	Interacting selectively and non-covalently with a cell adhesion molecule. [GOC:ai]	1	GO:0045296	1	F1SEA5	F1SEA5(GO:0045296)
GO:0030658	4	7	transport vesicle membrane	cellular_component	The lipid bilayer surrounding a transport vesicle. [GOC:mah]	1	GO:0030658	1	Q06A97	Q06A97(GO:0030658)
GO:0048518	4	4	positive regulation of biological process	biological_process	Any process that activates or increases the frequency, rate or extent of a biological process. Biological processes are regulated by many means; examples include the control of gene expression, protein modification or interaction with a protein or substrate molecule. [GOC:jid]	17	GO:2001168;GO:2000553;GO:0033129;GO:0043923;GO:0034157;GO:0043068;GO:0043065;GO:0045747;GO:0010628;GO:0045944;GO:0045880;GO:0034165;GO:0045737;GO:0032008;GO:0071157;GO:1904179;GO:2000144	13	C9E1C9;I3LPC6;F1RP31;I3LT15;I3LF05;F1RU26;G9BWQ2;F1S9L2;F1RWS7;F1SEA5;I3LDJ9;F6Q8T7;I3LM88	C9E1C9(GO:0033129;GO:0033129;GO:0045944;GO:0045944;GO:0071157;GO:2001168;GO:2001168);I3LPC6(GO:0045880);F1RP31(GO:0045944);I3LT15(GO:0045747);I3LF05(GO:0032008);F1RU26(GO:2000144);G9BWQ2(GO:1904179);F1S9L2(GO:0034157;GO:0034165;GO:2000553);F1RWS7(GO:0043923);F1SEA5(GO:0010628);I3LDJ9(GO:0043065;GO:0043068);F6Q8T7(GO:0045737;GO:0045944);I3LM88(GO:0045944)
GO:0048519	4	4	negative regulation of biological process	biological_process	Any process that stops, prevents, or reduces the frequency, rate or extent of a biological process. Biological processes are regulated by many means; examples include the control of gene expression, protein modification or interaction with a protein or substrate molecule. [GOC:jid]	14	GO:1901253;GO:0045926;GO:0050709;GO:1900364;GO:0045071;GO:0050680;GO:0010466;GO:0061045;GO:2000117;GO:0010951;GO:0001933;GO:0071157;GO:0030512;GO:0010839	7	C9E1C9;Q0Z8R0;P79379;F1S9L2;K7GKN2;K7GKY0;I3LPC6	C9E1C9(GO:0071157;GO:1900364);Q0Z8R0(GO:0010466;GO:2000117);P79379(GO:0045926);F1S9L2(GO:0045071;GO:0045071;GO:0050709);K7GKN2(GO:0045071;GO:0045071;GO:1901253);K7GKY0(GO:0001933;GO:0010839;GO:0010951;GO:0030512;GO:0061045);I3LPC6(GO:0050680)
GO:0000226	4	6	microtubule cytoskeleton organization	biological_process	A process that is carried out at the cellular level which results in the assembly, arrangement of constituent parts, or disassembly of cytoskeletal structures comprising microtubules and their associated proteins. [GOC:mah]	1	GO:0031122	1	I3LPC6	I3LPC6(GO:0031122)
GO:0009306	4	9	protein secretion	biological_process	The controlled release of proteins from a cell. [GOC:ai]	1	GO:0009306	1	F1SED4	F1SED4(GO:0009306)
GO:0044093	4	4	positive regulation of molecular function	biological_process	Any process that activates or increases the rate or extent of a molecular function, an elemental biological activity occurring at the molecular level, such as catalysis or binding. [GO:jl]	3	GO:1903839;GO:0045737;GO:0043547	3	F6Q8T7;C9E1C9;F1SED4	F6Q8T7(GO:0045737);C9E1C9(GO:1903839);F1SED4(GO:0043547)
GO:0044092	4	4	negative regulation of molecular function	biological_process	Any process that stops or reduces the rate or extent of a molecular function, an elemental biological activity occurring at the molecular level, such as catalysis or binding. [GO:jl]	3	GO:0010951;GO:2000117;GO:0010466	2	K7GKY0;Q0Z8R0	K7GKY0(GO:0010951);Q0Z8R0(GO:0010466;GO:2000117)
GO:0006725	4	4	cellular aromatic compound metabolic process	biological_process	The chemical reactions and pathways involving aromatic compounds, any organic compound characterized by one or more planar rings, each of which contains conjugated double bonds and delocalized pi electrons, as carried out by individual cells. [GOC:ai, ISBN:0198506732]	19	GO:0016180;GO:0090502;GO:0006351;GO:0031167;GO:0006281;GO:0000154;GO:0030490;GO:0006289;GO:0006228;GO:0006241;GO:0061614;GO:0006364;GO:0006165;GO:0006366;GO:0006368;GO:0010501;GO:0031297;GO:0006183;GO:0097359	13	F1RPV8;C9E1C9;F1RP31;F1RFL5;F1SBX8;F1RFZ6;F1SNA6;F1RP50;F1RHJ0;F6Q8T7;I3LM88;F1RU26;F1STY6	F1RPV8(GO:0006165;GO:0006183;GO:0006228;GO:0006241);C9E1C9(GO:0006368;GO:0031297);F1RP31(GO:0006351;GO:0006351);F1RFL5(GO:0010501);F1SBX8(GO:0090502);F1RFZ6(GO:0006364;GO:0006364;GO:0030490);F1SNA6(GO:0006281;GO:0006281);F1RP50(GO:0097359);F1RHJ0(GO:0000154;GO:0031167);F6Q8T7(GO:0006281;GO:0006289;GO:0006366);I3LM88(GO:0006366);F1RU26(GO:0061614);F1STY6(GO:0016180)
GO:0055082	4	6	cellular chemical homeostasis	biological_process	Any biological process involved in the maintenance of an internal steady state of a chemical at the level of the cell. [GOC:isa_complete, GOC:jid]	2	GO:0051480;GO:0006882	2	P79379;Q06A97	P79379(GO:0006882);Q06A97(GO:0051480)
GO:0055086	4	6	nucleobase-containing small molecule metabolic process	biological_process	The cellular chemical reactions and pathways involving a nucleobase-containing small molecule: a nucleobase, a nucleoside, or a nucleotide. [GOC:vw]	4	GO:0006228;GO:0006241;GO:0006183;GO:0006165	1	F1RPV8	F1RPV8(GO:0006165;GO:0006183;GO:0006228;GO:0006241)
GO:0032806	4	8	carboxy-terminal domain protein kinase complex	cellular_component	A protein complex that phosphorylates amino acid residues of RNA polymerase II C-terminal domain repeats; phosphorylation occurs mainly on Ser2 and Ser5. [PMID:15047695, PMID:16721054, PMID:17079683]	2	GO:0008024;GO:0005675	2	F6Q8T7;C9E1C9	F6Q8T7(GO:0005675;GO:0005675;GO:0005675);C9E1C9(GO:0008024;GO:0008024;GO:0008024)
GO:0048729	4	4	tissue morphogenesis	biological_process	The process in which the anatomical structures of a tissue are generated and organized. [GOC:dph, GOC:jid]	1	GO:0001947	1	I3LPC6	I3LPC6(GO:0001947)
GO:0016772	4	4	transferase activity, transferring phosphorus-containing groups	molecular_function	Catalysis of the transfer of a phosphorus-containing group from one compound (donor) to another (acceptor). [GOC:jl, ISBN:0198506732]	6	GO:0016301;GO:0004674;GO:0004550;GO:0004672;GO:0004693;GO:0008353	5	I3LT15;F1RPV8;F6Q8T7;C9E1C9;G9BWQ2	I3LT15(GO:0004672;GO:0004674);F1RPV8(GO:0004550);F6Q8T7(GO:0008353);C9E1C9(GO:0004672;GO:0004674;GO:0004693;GO:0004693;GO:0008353;GO:0008353;GO:0008353);G9BWQ2(GO:0004672;GO:0004674;GO:0004674;GO:0004674;GO:0016301)
GO:0008173	4	6	RNA methyltransferase activity	molecular_function	Catalysis of the transfer of a methyl group from a donor to a nucleoside residue in an RNA molecule. [GOC:mah]	2	GO:0000179;GO:0008649	1	F1RHJ0	F1RHJ0(GO:0000179;GO:0008649)
GO:0051098	4	4	regulation of binding	biological_process	Any process that modulates the frequency, rate or extent of binding, the selective interaction of a molecule with one or more specific sites on another molecule. [GOC:ai]	1	GO:1903839	1	C9E1C9	C9E1C9(GO:1903839)
GO:0030228	4	5	lipoprotein particle receptor activity	molecular_function	Combining with a lipoprotein particle and delivering the lipoprotein particle into the cell via endocytosis. A lipoprotein particle, also known as a lipoprotein, is a clathrate complex consisting of a lipid enwrapped in a protein host without covalent binding in such a way that the complex has a hydrophilic outer surface consisting of all the protein and the polar ends of any phospholipids. [CHEB…	1	GO:0030229	1	E7CXS1	E7CXS1(GO:0030229)
GO:0030968	4	6	endoplasmic reticulum unfolded protein response	biological_process	The series of molecular signals generated as a consequence of the presence of unfolded proteins in the endoplasmic reticulum (ER) or other ER-related stress; results in changes in the regulation of transcription and translation. [GOC:mah, PMID:12042763]	1	GO:0030968	1	F1RP50	F1RP50(GO:0030968)
GO:0044433	4	5	cytoplasmic vesicle part	cellular_component	Any constituent part of cytoplasmic vesicle, a vesicle formed of membrane or protein, found in the cytoplasm of a cell. [GOC:jl]	2	GO:0030658;GO:0030660	2	F1S8G9;Q06A97	F1S8G9(GO:0030660);Q06A97(GO:0030658)
GO:0044432	4	5	endoplasmic reticulum part	cellular_component	Any constituent part of the endoplasmic reticulum, the irregular network of unit membranes, visible only by electron microscopy, that occurs in the cytoplasm of many eukaryotic cells. The membranes form a complex meshwork of tubular channels, which are often expanded into slitlike cavities called cisternae. [GOC:jl]	4	GO:0071458;GO:0071556;GO:0030176;GO:0005789	3	F1S8G9;F1SED4;F1S9L2	F1S8G9(GO:0071458;GO:0071556);F1SED4(GO:0030176);F1S9L2(GO:0005789;GO:0005789)
GO:0044431	4	5	Golgi apparatus part	cellular_component	Any constituent part of the Golgi apparatus, a compound membranous cytoplasmic organelle of eukaryotic cells, consisting of flattened, ribosome-free vesicles arranged in a more or less regular stack. [GOC:jl]	2	GO:0032580;GO:0030660	2	F1S8G9;F1SA54	F1S8G9(GO:0030660);F1SA54(GO:0032580;GO:0032580)
GO:0044430	4	5	cytoskeletal part	cellular_component	Any constituent part of the cytoskeleton, a cellular scaffolding or skeleton that maintains cell shape, enables some cell motion (using structures such as flagella and cilia), and plays important roles in both intra-cellular transport (e.g. the movement of vesicles and organelles) and cellular division. Includes constituent parts of intermediate filaments, microfilaments, microtubules, and the mi…	6	GO:0036064;GO:0005819;GO:0005813;GO:0000922;GO:0051233;GO:0005930	3	F1RWS7;F1RNN4;I3LPC6	F1RWS7(GO:0000922;GO:0005813;GO:0005819;GO:0051233);F1RNN4(GO:0005813;GO:0005813;GO:0036064);I3LPC6(GO:0005930;GO:0036064)
GO:0044437	4	5	vacuolar part	cellular_component	Any constituent part of a vacuole, a closed structure, found only in eukaryotic cells, that is completely surrounded by unit membrane and contains liquid material. [GOC:jl]	1	GO:0005765	2	F1S8G9;I3LF05	F1S8G9(GO:0005765);I3LF05(GO:0005765)
GO:0009888	4	4	tissue development	biological_process	The process whose specific outcome is the progression of a tissue over time, from its formation to the mature structure. [ISBN:0471245208]	2	GO:0008544;GO:0021915	1	I3LPC6	I3LPC6(GO:0008544;GO:0021915)
GO:0030880	4	6	RNA polymerase complex	cellular_component	Any complex that possesses RNA polymerase activity; generally comprises a catalytic subunit and one or more additional subunits. [GOC:mah]	1	GO:0016591	1	F1RWS7	F1RWS7(GO:0016591)
GO:0023051	4	4	regulation of signaling	biological_process	Any process that modulates the frequency, rate or extent of a signaling process. [GOC:mtg_signal]	7	GO:0008589;GO:0032008;GO:0034157;GO:0045747;GO:0045880;GO:0034165;GO:0030512	5	I3LT15;I3LF05;K7GKY0;I3LPC6;F1S9L2	I3LT15(GO:0045747);I3LF05(GO:0032008);K7GKY0(GO:0030512);I3LPC6(GO:0008589;GO:0045880);F1S9L2(GO:0034157;GO:0034165)
GO:0043933	4	4	macromolecular complex subunit organization	biological_process	Any process in which macromolecules aggregate, disaggregate, or are modified, resulting in the formation, disassembly, or alteration of a macromolecular complex. [GOC:mtg_mpo]	4	GO:0003374;GO:0006334;GO:0006335;GO:0051260	3	F1SUE6;K7GKN2;F1S7L7	F1SUE6(GO:0051260);K7GKN2(GO:0003374);F1S7L7(GO:0006334;GO:0006335)
GO:0043168	4	4	anion binding	molecular_function	Interacting selectively and non-covalently with anions, charged atoms or groups of atoms with a net negative charge. [GOC:jl]	2	GO:0005524;GO:0005525	8	C9E1C9;I3LT15;K7GKN2;G9BWQ2;F1RFL5;F1SJG5;I3LFY4;I3LM88	C9E1C9(GO:0005524;GO:0005524);I3LT15(GO:0005524);K7GKN2(GO:0005525;GO:0005525);G9BWQ2(GO:0005524;GO:0005524);F1RFL5(GO:0005524;GO:0005524);F1SJG5(GO:0005524);I3LFY4(GO:0005524);I3LM88(GO:0005524)
GO:0000768	4	5	syncytium formation by plasma membrane fusion	biological_process	The formation of a syncytium, a mass of cytoplasm containing several nuclei enclosed within a single plasma membrane, by the fusion of the plasma membranes of two or more individual cells. [GOC:mtg_muscle, GOC:tb]	1	GO:0072675	1	K7GKY0	K7GKY0(GO:0072675)
GO:0032403	4	4	protein complex binding	molecular_function	Interacting selectively and non-covalently with any protein complex (a complex of two or more proteins that may include other nonprotein molecules). [GOC:mah]	1	GO:0035612	1	I3LT15	I3LT15(GO:0035612)
GO:0035295	4	4	tube development	biological_process	The process whose specific outcome is the progression of a tube over time, from its initial formation to a mature structure. Epithelial and endothelial tubes transport gases, liquids and cells from one site to another and form the basic structure of many organs and tissues including lung and trachea, kidney, the mammary gland, the vascular system and the gastrointestinal and urinary-genital tract…	2	GO:0061525;GO:0021915	1	I3LPC6	I3LPC6(GO:0021915;GO:0061525)
GO:0031080	4	6	nuclear pore outer ring	cellular_component	A subcomplex of the nuclear pore complex (NPC) that forms the outer rings of the core scaffold, a lattice-like structure that gives the NPC its shape and strength. In S. cerevisiae, the two outer rings each contain multiple copies of the following proteins: Nup133p, Nup120p, Nup145Cp, Nup85p, Nup84p, Seh1p, and Sec13p. In vertebrates, the two outer rings each contain multiple copies of the follow…	1	GO:0031080	1	F1SRJ4	F1SRJ4(GO:0031080;GO:0031080)
GO:0120025	4	4	plasma membrane bounded cell projection	cellular_component	A prolongation or process extending from a cell and that is bounded by plasma membrane, e.g. a cilium, lamellipodium, or axon. [GOC:krc]	2	GO:0043005;GO:0005929	3	F1RNN4;I3LPC6;Q06A97	F1RNN4(GO:0005929;GO:0005929);I3LPC6(GO:0005929);Q06A97(GO:0043005)
GO:0030529	4	4	intracellular ribonucleoprotein complex	cellular_component	An intracellular macromolecular complex containing both protein and RNA molecules. [GOC:krc, GOC:vesicles]	3	GO:0015934;GO:0036464;GO:0005762	3	I3LTC4;C9E1C9;F1SJQ4	I3LTC4(GO:0005762;GO:0015934);C9E1C9(GO:0036464;GO:0036464);F1SJQ4(GO:0036464)
GO:0010035	4	4	response to inorganic substance	biological_process	Any process that results in a change in state or activity of a cell or an organism (in terms of movement, secretion, enzyme production, gene expression, etc.) as a result of an inorganic substance stimulus. [GOC:sm]	2	GO:0051592;GO:0071294	2	P79379;F6Q8T7	P79379(GO:0071294);F6Q8T7(GO:0051592)
GO:0010033	4	4	response to organic substance	biological_process	Any process that results in a change in state or activity of a cell or an organism (in terms of movement, secretion, enzyme production, gene expression, etc.) as a result of an organic substance stimulus. [GOC:sm]	4	GO:0071345;GO:0071357;GO:0071712;GO:0035457	4	F1RP50;K7GKN2;C9E1C9;F1SCY2	F1RP50(GO:0071712);K7GKN2(GO:0071357);C9E1C9(GO:0071345);F1SCY2(GO:0035457)
GO:0040008	4	4	regulation of growth	biological_process	Any process that modulates the frequency, rate or extent of the growth of all or part of an organism so that it occurs at its proper speed, either globally or in a specific part of the organism's development. [GOC:ems, GOC:mah]	1	GO:0045926	1	P79379	P79379(GO:0045926)
GO:0044260	4	5	cellular macromolecule metabolic process	biological_process	The chemical reactions and pathways involving macromolecules, any molecule of high relative molecular mass, the structure of which essentially comprises the multiple repetition of units derived, actually or conceptually, from molecules of low relative molecular mass, as carried out by individual cells. [CHEBI:33694, GOC:mah]	25	GO:0018105;GO:0006470;GO:0016180;GO:0006486;GO:0070979;GO:0006364;GO:0006366;GO:0006368;GO:0010501;GO:0031297;GO:0018279;GO:0006468;GO:0006281;GO:0006289;GO:0031167;GO:0061614;GO:0090502;GO:0070940;GO:0000154;GO:0030490;GO:0070816;GO:0016567;GO:0006351;GO:0033578;GO:0006412	19	F1RHJ0;F1SBX8;I3LTC4;C9E1C9;F1RP31;F1RFL5;I3L7Q8;F1RFZ6;G9BWQ2;I3LT15;F1RWS7;F1SNA6;F1RP50;F1STY6;F1S6I1;F1SA54;F1RU26;F6Q8T7;I3LM88	F1RHJ0(GO:0000154;GO:0031167);F1SBX8(GO:0090502);I3LTC4(GO:0006412);C9E1C9(GO:0006368;GO:0006468;GO:0006468;GO:0031297;GO:0070816);F1RP31(GO:0006351;GO:0006351);F1RFL5(GO:0010501);I3L7Q8(GO:0070979);F1RFZ6(GO:0006364;GO:0006364;GO:0030490);G9BWQ2(GO:0006468;GO:0018105);I3LT15(GO:0006468;GO:0006468);F1RWS7(GO:0006470;GO:0070940);F1SNA6(GO:0006281;GO:0006281);F1RP50(GO:0006486;GO:0018279);F1STY6(GO…
GO:0016741	4	4	transferase activity, transferring one-carbon groups	molecular_function	Catalysis of the transfer of a one-carbon group from one compound (donor) to another (acceptor). [GOC:jl, ISBN:0198506732]	2	GO:0000179;GO:0008649	1	F1RHJ0	F1RHJ0(GO:0000179;GO:0008649)
GO:0044391	4	5	ribosomal subunit	cellular_component	Either of the two subunits of a ribosome: the ribosomal large subunit or the ribosomal small subunit. [GOC:jl]	2	GO:0015934;GO:0005762	1	I3LTC4	I3LTC4(GO:0005762;GO:0015934)
GO:1901576	4	4	organic substance biosynthetic process	biological_process	The chemical reactions and pathways resulting in the formation of an organic substance, any molecular entity containing carbon. [GOC:pr, GOC:TermGenie]	8	GO:0006228;GO:0006241;GO:0061614;GO:0006351;GO:0006366;GO:0006368;GO:0006412;GO:0006183	7	F1RPV8;I3LTC4;C9E1C9;F1RP31;F1RU26;F6Q8T7;I3LM88	F1RPV8(GO:0006183;GO:0006228;GO:0006241);I3LTC4(GO:0006412);C9E1C9(GO:0006368);F1RP31(GO:0006351;GO:0006351);F1RU26(GO:0061614);F6Q8T7(GO:0006366);I3LM88(GO:0006366)
GO:0000166	4	5	nucleotide binding	molecular_function	Interacting selectively and non-covalently with a nucleotide, any compound consisting of a nucleoside that is esterified with (ortho)phosphate or an oligophosphate at any hydroxyl group on the ribose or deoxyribose. [GOC:mah, ISBN:0198547684]	3	GO:0005525;GO:0005524;GO:0000166	8	C9E1C9;I3LT15;F1SJG5;G9BWQ2;F1RFL5;K7GKN2;I3LFY4;I3LM88	C9E1C9(GO:0000166;GO:0005524;GO:0005524);I3LT15(GO:0005524);F1SJG5(GO:0005524);G9BWQ2(GO:0000166;GO:0005524;GO:0005524);F1RFL5(GO:0000166;GO:0005524;GO:0005524);K7GKN2(GO:0000166;GO:0005525;GO:0005525);I3LFY4(GO:0005524);I3LM88(GO:0005524)
GO:0051536	4	4	iron-sulfur cluster binding	molecular_function	Interacting selectively and non-covalently with an iron-sulfur cluster, a combination of iron and sulfur atoms. [GOC:ai]	2	GO:0051536;GO:0051539	1	F1S9L2	F1S9L2(GO:0051536;GO:0051539)
GO:0006810	4	4	transport	biological_process	The directed movement of substances (such as macromolecules, small molecules, ions) or cellular components (such as complexes and organelles) into, out of or within a cell, or between cells, or within a multicellular organism by means of some agent such as a transporter, pore or motor protein. [GOC:dos, GOC:dph, GOC:jl, GOC:mah]	8	GO:0016973;GO:0006898;GO:0009306;GO:0006810;GO:0042073;GO:0035735;GO:0015031;GO:0006406	5	F1SJ46;F1SED4;F1RNN4;F1SJQ4;E7CXS1	F1SJ46(GO:0006810;GO:0015031);F1SED4(GO:0009306);F1RNN4(GO:0035735;GO:0042073;GO:0042073);F1SJQ4(GO:0006406;GO:0016973);E7CXS1(GO:0006898)
GO:0007028	4	4	cytoplasm organization	biological_process	A process that is carried out at the cellular level which results in the assembly, arrangement of constituent parts, or disassembly of the cytoplasm. The cytoplasm is all of the contents of a cell excluding the plasma membrane and nucleus, but including other subcellular structures. [GOC:curators, GOC:dph, GOC:jl, GOC:mah]	1	GO:0007296	1	F1RU26	F1RU26(GO:0007296)
GO:0010273	4	4	detoxification of copper ion	biological_process	Any process that reduces or removes the toxicity of copper ion. These include transport of copper away from sensitive areas and to compartments or complexes whose purpose is sequestration of copper ion. [GOC:kmv, PMID:16367966]	1	GO:0010273	1	P79379	P79379(GO:0010273)
GO:0006996	4	4	organelle organization	biological_process	A process that is carried out at the cellular level which results in the assembly, arrangement of constituent parts, or disassembly of an organelle within a cell. An organelle is an organized structure of distinctive morphology and function. Includes the nucleus, mitochondria, plastids, vacuoles, vesicles, ribosomes and the cytoskeleton. Excludes the plasma membrane. [GOC:mah]	7	GO:0007010;GO:0060271;GO:0000266;GO:0030036;GO:0031122;GO:0097345;GO:1905515	5	K7GKN2;I3LH80;F1RNN4;I3LPC6;I3LDJ9	K7GKN2(GO:0000266);I3LH80(GO:0007010;GO:0030036);F1RNN4(GO:0060271;GO:0060271;GO:0060271);I3LPC6(GO:0031122;GO:0060271;GO:0060271;GO:0060271;GO:1905515);I3LDJ9(GO:0097345)
GO:0051607	4	7	defense response to virus	biological_process	Reactions triggered in response to the presence of a virus that act to protect the cell or organism. [GOC:ai]	1	GO:0051607	4	K7GN56;K7GKN2;F1SCY2;F1S9L2	K7GN56(GO:0051607);K7GKN2(GO:0051607;GO:0051607;GO:0051607);F1SCY2(GO:0051607);F1S9L2(GO:0051607;GO:0051607;GO:0051607)
GO:0043900	4	4	regulation of multi-organism process	biological_process	Any process that modulates the frequency, rate or extent of a multi-organism process, a process in which an organism has an effect on another organism of the same or different species. [GOC:jl]	3	GO:1901253;GO:0045071;GO:0043923	3	K7GKN2;F1RWS7;F1S9L2	K7GKN2(GO:0045071;GO:0045071;GO:1901253);F1RWS7(GO:0043923);F1S9L2(GO:0045071;GO:0045071)
GO:0003677	5	5	DNA binding	molecular_function	Any molecular function by which a gene product interacts selectively and non-covalently with DNA (deoxyribonucleic acid). [GOC:dph, GOC:jl, GOC:tb, GOC:vw]	7	GO:0044212;GO:0043565;GO:0001164;GO:0000977;GO:0003677;GO:0000978;GO:0000979	6	F1SLA2;C9E1C9;F1RP31;F1SG36;F1RU26;I3LM88	F1SLA2(GO:0001164;GO:0003677);C9E1C9(GO:0000979;GO:0003677;GO:0044212;GO:0044212);F1RP31(GO:0000977;GO:0003677;GO:0003677;GO:0003677);F1SG36(GO:0043565);F1RU26(GO:0000977;GO:0000978;GO:0003677;GO:0003677);I3LM88(GO:0000978)
GO:0005739	5	6	mitochondrion	cellular_component	A semiautonomous, self replicating organelle that occurs in varying numbers, shapes, and sizes in the cytoplasm of virtually all eukaryotic cells. It is notably the site of tissue respiration. [GOC:giardia, ISBN:0198506732]	1	GO:0005739	1	F1S9L2	F1S9L2(GO:0005739)
GO:0043412	5	5	macromolecule modification	biological_process	The covalent alteration of one or more monomeric units in a polypeptide, polynucleotide, polysaccharide, or other biological macromolecule, resulting in a change in its properties. [GOC:go_curators]	12	GO:0006468;GO:0018105;GO:0070940;GO:0006486;GO:0016567;GO:0000154;GO:0006470;GO:0070816;GO:0070979;GO:0031167;GO:0033578;GO:0018279	10	C9E1C9;I3LT15;I3L7Q8;G9BWQ2;F1RWS7;F1RP50;F1RHJ0;F1S6I1;F6Q8T7;F1SA54	C9E1C9(GO:0006468;GO:0006468;GO:0070816);I3LT15(GO:0006468;GO:0006468);I3L7Q8(GO:0070979);G9BWQ2(GO:0006468;GO:0018105);F1RWS7(GO:0006470;GO:0070940);F1RP50(GO:0006486;GO:0018279);F1RHJ0(GO:0000154;GO:0031167);F1S6I1(GO:0016567);F6Q8T7(GO:0006468);F1SA54(GO:0006486;GO:0033578)
GO:0031503	5	5	protein complex localization	biological_process	A localization process that acts on a protein complex; the complex is transported to, or maintained in, a specific location. [GOC:mah]	2	GO:0035735;GO:0042073	1	F1RNN4	F1RNN4(GO:0035735;GO:0042073;GO:0042073)
GO:0035612	5	5	AP-2 adaptor complex binding	molecular_function	Interacting selectively and non-covalently with the AP-2 adaptor complex. The AP-2 adaptor complex is a heterotetrameric AP-type membrane coat adaptor complex that consists of alpha, beta2, mu2 and sigma2 subunits and links clathrin to the membrane surface of a vesicle. In at least humans, the AP-2 complex can be heterogeneric due to the existence of multiple subunit isoforms encoded by different…	1	GO:0035612	1	I3LT15	I3LT15(GO:0035612)
GO:0005675	5	9	holo TFIIH complex	cellular_component	A complex that is capable of kinase activity directed towards the C-terminal Domain (CTD) of the largest subunit of RNA polymerase II and is essential for initiation at RNA polymerase II promoters in vitro. It is composed of the core TFIIH complex and the TFIIK complex. [GOC:ew, GOC:krc, PMID:14500720, PMID:22308316, PMID:22572993, PMID:7813015]	1	GO:0005675	1	F6Q8T7	F6Q8T7(GO:0005675;GO:0005675;GO:0005675)
GO:0000428	5	7	DNA-directed RNA polymerase complex	cellular_component	A protein complex that possesses DNA-directed RNA polymerase activity. [GOC:krc]	1	GO:0016591	1	F1RWS7	F1RWS7(GO:0016591)
GO:0051726	5	5	regulation of cell cycle	biological_process	Any process that modulates the rate or extent of progression through the cell cycle. [GOC:ai, GOC:dph, GOC:tb]	3	GO:0000079;GO:0045737;GO:0071157	2	F6Q8T7;C9E1C9	F6Q8T7(GO:0000079;GO:0045737);C9E1C9(GO:0071157)
GO:0044772	5	5	mitotic cell cycle phase transition	biological_process	The cell cycle process by which a cell commits to entering the next mitotic cell cycle phase. [GOC:mtg_cell_cycle]	1	GO:0010458	1	F1RWS7	F1RWS7(GO:0010458)
GO:0006518	5	6	peptide metabolic process	biological_process	The chemical reactions and pathways involving peptides, compounds of two or more amino acids where the alpha carboxyl group of one is bound to the alpha amino group of another. [CHEBI:16670, GOC:go_curators]	1	GO:0006412	1	I3LTC4	I3LTC4(GO:0006412)
GO:0004004	5	11	ATP-dependent RNA helicase activity	molecular_function	Catalysis of the reaction: ATP + H2O = ADP + phosphate; this reaction drives the unwinding of an RNA helix. [EC:3.6.1.3, GOC:jl]	1	GO:0004004	1	F1RFL5	F1RFL5(GO:0004004)
GO:1901362	5	5	organic cyclic compound biosynthetic process	biological_process	The chemical reactions and pathways resulting in the formation of organic cyclic compound. [GOC:TermGenie]	7	GO:0006228;GO:0006241;GO:0061614;GO:0006351;GO:0006366;GO:0006368;GO:0006183	6	F1RPV8;C9E1C9;F1RP31;F1RU26;F6Q8T7;I3LM88	F1RPV8(GO:0006183;GO:0006228;GO:0006241);C9E1C9(GO:0006368);F1RP31(GO:0006351;GO:0006351);F1RU26(GO:0061614);F6Q8T7(GO:0006366);I3LM88(GO:0006366)
GO:0060341	5	5	regulation of cellular localization	biological_process	Any process that modulates the frequency, rate or extent of a process in which a cell, a substance, or a cellular entity is transported to, or maintained in a specific location within or in the membrane of a cell. [GOC:dph, GOC:tb]	1	GO:0003400	1	F1SED4	F1SED4(GO:0003400)
GO:0060348	5	5	bone development	biological_process	The process whose specific outcome is the progression of bone over time, from its formation to the mature structure. Bone is the hard skeletal connective tissue consisting of both mineral and cellular components. [GOC:dph]	1	GO:0060348	1	I3LPC6	I3LPC6(GO:0060348)
GO:0051336	5	5	regulation of hydrolase activity	biological_process	Any process that modulates the frequency, rate or extent of hydrolase activity, the catalysis of the hydrolysis of various bonds, e.g. C-O, C-N, C-C, phosphoric anhydride bonds, etc. Hydrolase is the systematic name for any enzyme of EC class 3. [EC:3.-.-.-, GOC:ai]	4	GO:0010951;GO:2000117;GO:0010466;GO:0043547	3	K7GKY0;Q0Z8R0;F1SED4	K7GKY0(GO:0010951);Q0Z8R0(GO:0010466;GO:2000117);F1SED4(GO:0043547)
GO:0051338	5	5	regulation of transferase activity	biological_process	Any process that modulates the frequency, rate or extent of transferase activity, the catalysis of the transfer of a group, e.g. a methyl group, glycosyl group, acyl group, phosphorus-containing, or other groups, from one compound (generally regarded as the donor) to another compound (generally regarded as the acceptor). Transferase is the systematic name for any enzyme of EC class 2. [EC:2.-.-.-…	3	GO:0000079;GO:0045737;GO:0051438	2	F6Q8T7;F1S6I1	F6Q8T7(GO:0000079;GO:0045737);F1S6I1(GO:0051438)
GO:0022603	5	5	regulation of anatomical structure morphogenesis	biological_process	Any process that modulates the frequency, rate or extent of anatomical structure morphogenesis. [GOC:mah]	1	GO:0008360	1	I3LH80	I3LH80(GO:0008360)
GO:0005730	5	6	nucleolus	cellular_component	A small, dense body one or more of which are present in the nucleus of eukaryotic cells. It is rich in RNA and protein, is not bounded by a limiting membrane, and is not seen during mitosis. Its prime function is the transcription of the nucleolar DNA into 45S ribosomal-precursor RNA, the processing of this RNA into 5.8S, 18S, and 28S components of ribosomal RNA, and the association of these comp…	1	GO:0005730	1	F1RFL5	F1RFL5(GO:0005730;GO:0005730;GO:0005730)
GO:0019209	5	5	kinase activator activity	molecular_function	Binds to and increases the activity of a kinase, an enzyme which catalyzes of the transfer of a phosphate group, usually from ATP, to a substrate molecule. [GOC:ai]	1	GO:0061575	1	F6Q8T7	F6Q8T7(GO:0061575)
GO:0006011	5	7	UDP-glucose metabolic process	biological_process	The chemical reactions and pathways involving UDP-glucose, uridinediphosphoglucose, a substance composed of glucose in glycosidic linkage with uridine diphosphate. [GOC:ai]	1	GO:0097359	1	F1RP50	F1RP50(GO:0097359)
GO:0006259	5	7	DNA metabolic process	biological_process	Any cellular metabolic process involving deoxyribonucleic acid. This is one of the two main types of nucleic acid, consisting of a long, unbranched macromolecule formed from one, or more commonly, two, strands of linked deoxyribonucleotides. [ISBN:0198506732]	3	GO:0006289;GO:0031297;GO:0006281	3	F6Q8T7;F1SNA6;C9E1C9	F6Q8T7(GO:0006281;GO:0006289);F1SNA6(GO:0006281;GO:0006281);C9E1C9(GO:0031297)
GO:0005783	5	6	endoplasmic reticulum	cellular_component	The irregular network of unit membranes, visible only by electron microscopy, that occurs in the cytoplasm of many eukaryotic cells. The membranes form a complex meshwork of tubular channels, which are often expanded into slitlike cavities called cisternae. The ER takes two forms, rough (or granular), with ribosomes adhering to the outer surface, and smooth (with no ribosomes attached). [ISBN:019…	1	GO:0005783	3	I3LDJ9;F1RP50;F1S9L2	I3LDJ9(GO:0005783);F1RP50(GO:0005783);F1S9L2(GO:0005783;GO:0005783)
GO:0065003	5	5	macromolecular complex assembly	biological_process	The aggregation, arrangement and bonding together of a set of macromolecules to form a complex. [GOC:jl]	4	GO:0003374;GO:0006334;GO:0006335;GO:0051260	3	F1SUE6;K7GKN2;F1S7L7	F1SUE6(GO:0051260);K7GKN2(GO:0003374);F1S7L7(GO:0006334;GO:0006335)
GO:0070603	5	7	SWI/SNF superfamily-type complex	cellular_component	A protein complex that contains an ortholog of the Saccharomyces ATPase Swi2/Snf2 as one of the catalytic subunit components (ATPase) and mediates assembly of nucleosomes, changes to the spacing or structure of nucleosomes, or some combination of those activities in a manner that requires ATP. [GOC:bm, GOC:krc, GOC:mah, PMID:16155938]	1	GO:0016514	1	F1SJG5	F1SJG5(GO:0016514)
GO:0045595	5	5	regulation of cell differentiation	biological_process	Any process that modulates the frequency, rate or extent of cell differentiation, the process in which relatively unspecialized cells acquire specialized structural and functional features. [GOC:go_curators]	2	GO:0045616;GO:0051147	2	K7GKY0;C9E1C9	K7GKY0(GO:0045616);C9E1C9(GO:0051147)
GO:0032549	5	5	ribonucleoside binding	molecular_function	Interacting selectively and non-covalently with a ribonucleoside, a compound consisting of a purine or pyrimidine nitrogenous base linked to ribose. [GOC:mah]	1	GO:0005525	1	K7GKN2	K7GKN2(GO:0005525;GO:0005525)
GO:0044454	5	6	nuclear chromosome part	cellular_component	Any constituent part of a nuclear chromosome, a chromosome that encodes the nuclear genome and is found in the nucleus of a eukaryotic cell during the cell cycle phases when the nucleus is intact. [GOC:jl]	2	GO:0000790;GO:0016514	2	F1SJG5;F1S7L7	F1SJG5(GO:0016514);F1S7L7(GO:0000790)
GO:0044451	5	6	nucleoplasm part	cellular_component	Any constituent part of the nucleoplasm, that part of the nuclear content other than the chromosomes or the nucleolus. [GOC:jl]	7	GO:0016607;GO:0016605;GO:0008023;GO:0008024;GO:0032039;GO:0005675;GO:0016591	6	F1SLA2;C9E1C9;F1SJQ4;F1RWS7;F1STY6;F6Q8T7	F1SLA2(GO:0016607);C9E1C9(GO:0008023;GO:0008024;GO:0008024;GO:0008024;GO:0016605);F1SJQ4(GO:0016607);F1RWS7(GO:0016591;GO:0016607);F1STY6(GO:0032039);F6Q8T7(GO:0005675;GO:0005675;GO:0005675)
GO:0044452	5	6	nucleolar part	cellular_component	Any constituent part of a nucleolus, a small, dense body one or more of which are present in the nucleus of eukaryotic cells. It is rich in RNA and protein, is not bounded by a limiting membrane, and is not seen during mitosis. [GOC:jl]	1	GO:0001650	1	F1S9L2	F1S9L2(GO:0001650)
GO:0051240	5	5	positive regulation of multicellular organismal process	biological_process	Any process that activates or increases the frequency, rate or extent of an organismal process, any of the processes pertinent to the function of an organism above the cellular level; includes the integrated processes of tissues and organs. [GOC:ai]	2	GO:2000553;GO:1904179	2	G9BWQ2;F1S9L2	G9BWQ2(GO:1904179);F1S9L2(GO:2000553)
GO:0044271	5	5	cellular nitrogen compound biosynthetic process	biological_process	The chemical reactions and pathways resulting in the formation of organic and inorganic nitrogenous compounds. [GOC:jl, ISBN:0198506732]	8	GO:0006228;GO:0006241;GO:0061614;GO:0006351;GO:0006366;GO:0006368;GO:0006412;GO:0006183	7	F1RPV8;I3LTC4;C9E1C9;F1RP31;F1RU26;F6Q8T7;I3LM88	F1RPV8(GO:0006183;GO:0006228;GO:0006241);I3LTC4(GO:0006412);C9E1C9(GO:0006368);F1RP31(GO:0006351;GO:0006351);F1RU26(GO:0061614);F6Q8T7(GO:0006366);I3LM88(GO:0006366)
GO:0034976	5	5	response to endoplasmic reticulum stress	biological_process	Any process that results in a change in state or activity of a cell (in terms of movement, secretion, enzyme production, gene expression, etc.) as a result of a stress acting at the endoplasmic reticulum. ER stress usually results from the accumulation of unfolded or misfolded proteins in the ER lumen. [GOC:cjm, GOC:mah]	2	GO:0071712;GO:0030968	1	F1RP50	F1RP50(GO:0030968;GO:0071712)
GO:0046872	5	5	metal ion binding	molecular_function	Interacting selectively and non-covalently with any metal ion. [GOC:ai]	4	GO:0005507;GO:0046872;GO:0008270;GO:0005509	8	F1SLA2;I3LTC4;P79379;I3LUD1;Q06A97;E7CXS1;F1SP42;I3LM88	F1SLA2(GO:0046872);I3LTC4(GO:0046872);P79379(GO:0008270;GO:0046872;GO:0046872;GO:0046872);I3LUD1(GO:0005507;GO:0008270;GO:0046872;GO:0046872);Q06A97(GO:0005509;GO:0005509;GO:0046872);E7CXS1(GO:0005509);F1SP42(GO:0005509);I3LM88(GO:0008270)
GO:1901137	5	5	carbohydrate derivative biosynthetic process	biological_process	The chemical reactions and pathways resulting in the formation of carbohydrate derivative. [GOC:TermGenie]	3	GO:0006228;GO:0006241;GO:0006183	1	F1RPV8	F1RPV8(GO:0006183;GO:0006228;GO:0006241)
GO:0061135	5	5	endopeptidase regulator activity	molecular_function	Modulates the activity of a peptidase, any enzyme that hydrolyzes nonterminal peptide bonds in polypeptides. [GOC:dph, GOC:tb]	2	GO:0004869;GO:0004866	2	K7GKY0;Q0Z8R0	K7GKY0(GO:0004866);Q0Z8R0(GO:0004869;GO:0004869;GO:0004869)
GO:0042578	5	5	phosphoric ester hydrolase activity	molecular_function	Catalysis of the reaction: RPO-R' + H2O = RPOOH + R'H. This reaction is the hydrolysis of any phosphoric ester bond, any ester formed from orthophosphoric acid, O=P(OH)3. [GOC:jl]	1	GO:0008420	1	F1RWS7	F1RWS7(GO:0008420;GO:0008420)
GO:0042579	5	6	microbody	cellular_component	Cytoplasmic organelles, spherical or oval in shape, that are bounded by a single membrane and contain oxidative enzymes, especially those utilizing hydrogen peroxide (H2O2). [ISBN:0198506732]	1	GO:0005777	1	F1SUE6	F1SUE6(GO:0005777;GO:0005777)
GO:0008024	5	10	cyclin/CDK positive transcription elongation factor complex	cellular_component	A transcription elongation factor complex that facilitates the transition from abortive to productive elongation by phosphorylating the CTD domain of the large subunit of DNA-directed RNA polymerase II, holoenzyme. Contains a cyclin and a cyclin-dependent protein kinase catalytic subunit. [GOC:bhm, GOC:vw, PMID:10766736, PMID:16721054, PMID:17079683, PMID:19328067, PMID:7759473]	1	GO:0008024	1	C9E1C9	C9E1C9(GO:0008024;GO:0008024;GO:0008024)
GO:0019430	5	6	removal of superoxide radicals	biological_process	Any process, acting at the cellular level, involved in removing superoxide radicals (O2-) from a cell or organism, e.g. by conversion to dioxygen (O2) and hydrogen peroxide (H2O2). [CHEBI:18421, GOC:jl]	1	GO:0019430	1	I3LUD1	I3LUD1(GO:0019430)
GO:0019438	5	5	aromatic compound biosynthetic process	biological_process	The chemical reactions and pathways resulting in the formation of aromatic compounds, any substance containing an aromatic carbon ring. [GOC:ai]	7	GO:0006228;GO:0006241;GO:0061614;GO:0006351;GO:0006366;GO:0006368;GO:0006183	6	F1RPV8;C9E1C9;F1RP31;F1RU26;F6Q8T7;I3LM88	F1RPV8(GO:0006183;GO:0006228;GO:0006241);C9E1C9(GO:0006368);F1RP31(GO:0006351;GO:0006351);F1RU26(GO:0061614);F6Q8T7(GO:0006366);I3LM88(GO:0006366)
GO:0045926	5	5	negative regulation of growth	biological_process	Any process that stops, prevents or reduces the rate or extent of growth, the increase in size or mass of all or part of an organism. [GOC:go_curators]	1	GO:0045926	1	P79379	P79379(GO:0045926)
GO:0048523	5	5	negative regulation of cellular process	biological_process	Any process that stops, prevents, or reduces the frequency, rate or extent of a cellular process, any of those that are carried out at the cellular level, but are not necessarily restricted to a single cell. For example, cell communication occurs among more than one cell, but occurs at the cellular level. [GOC:jid]	10	GO:0050709;GO:1900364;GO:0050680;GO:0010466;GO:2000117;GO:0010951;GO:0001933;GO:0071157;GO:0030512;GO:0010839	5	Q0Z8R0;K7GKY0;C9E1C9;I3LPC6;F1S9L2	Q0Z8R0(GO:0010466;GO:2000117);K7GKY0(GO:0001933;GO:0010839;GO:0010951;GO:0030512);C9E1C9(GO:0071157;GO:1900364);I3LPC6(GO:0050680);F1S9L2(GO:0050709)
GO:0048522	5	5	positive regulation of cellular process	biological_process	Any process that activates or increases the frequency, rate or extent of a cellular process, any of those that are carried out at the cellular level, but are not necessarily restricted to a single cell. For example, cell communication occurs among more than one cell, but occurs at the cellular level. [GOC:jid]	13	GO:2001168;GO:0033129;GO:0032008;GO:0034157;GO:0043065;GO:0045747;GO:0045944;GO:2000144;GO:0034165;GO:0045737;GO:0071157;GO:0043068;GO:0045880	10	C9E1C9;I3LPC6;F1RP31;I3LT15;I3LF05;F1RU26;F1S9L2;I3LDJ9;F6Q8T7;I3LM88	C9E1C9(GO:0033129;GO:0033129;GO:0045944;GO:0045944;GO:0071157;GO:2001168;GO:2001168);I3LPC6(GO:0045880);F1RP31(GO:0045944);I3LT15(GO:0045747);I3LF05(GO:0032008);F1RU26(GO:2000144);F1S9L2(GO:0034157;GO:0034165);I3LDJ9(GO:0043065;GO:0043068);F6Q8T7(GO:0045737;GO:0045944);I3LM88(GO:0045944)
GO:0005096	5	6	GTPase activator activity	molecular_function	Binds to and increases the activity of a GTPase, an enzyme that catalyzes the hydrolysis of GTP. [GOC:mah]	1	GO:0005096	1	F1SED4	F1SED4(GO:0005096)
GO:0000785	5	6	chromatin	cellular_component	The ordered and organized complex of DNA, protein, and sometimes RNA, that forms the chromosome. [GOC:elh, PMID:20404130]	1	GO:0000790	1	F1S7L7	F1S7L7(GO:0000790)
GO:1905710	5	5	positive regulation of membrane permeability	biological_process	Any process that activates or increases the frequency, rate or extent of the passage or uptake of molecules by a membrane. [PMID:27482894]	1	GO:0097345	1	I3LDJ9	I3LDJ9(GO:0097345)
GO:0090407	5	6	organophosphate biosynthetic process	biological_process	The chemical reactions and pathways resulting in the biosynthesis of deoxyribose phosphate, the phosphorylated sugar 2-deoxy-erythro-pentose. [GOC:chem_mtg]	3	GO:0006228;GO:0006241;GO:0006183	1	F1RPV8	F1RPV8(GO:0006183;GO:0006228;GO:0006241)
GO:0060173	5	5	limb development	biological_process	The process whose specific outcome is the progression of a limb over time, from its formation to the mature structure. A limb is an appendage of an animal used for locomotion or grasping. Examples include legs, arms or some types of fin. [GOC:dgh, GOC:dph, PMID:11487378]	1	GO:0060173	1	I3LPC6	I3LPC6(GO:0060173)
GO:0036211	5	6	protein modification process	biological_process	The covalent alteration of one or more amino acids occurring in proteins, peptides and nascent polypeptides (co-translational, post-translational modifications). Includes the modification of charged tRNAs that are destined to occur in a protein (pre-translation modification). [GOC:bf, GOC:jl]	10	GO:0006468;GO:0018105;GO:0070940;GO:0006486;GO:0070979;GO:0006470;GO:0070816;GO:0016567;GO:0033578;GO:0018279	9	C9E1C9;I3LT15;G9BWQ2;F1RWS7;F1RP50;I3L7Q8;F1S6I1;F6Q8T7;F1SA54	C9E1C9(GO:0006468;GO:0006468;GO:0070816);I3LT15(GO:0006468;GO:0006468);G9BWQ2(GO:0006468;GO:0018105);F1RWS7(GO:0006470;GO:0070940);F1RP50(GO:0006486;GO:0018279);I3L7Q8(GO:0070979);F1S6I1(GO:0016567);F6Q8T7(GO:0006468);F1SA54(GO:0006486;GO:0033578)
GO:0045682	5	5	regulation of epidermis development	biological_process	Any process that modulates the frequency, rate or extent of epidermis development. [GOC:go_curators]	1	GO:0045616	1	K7GKY0	K7GKY0(GO:0045616)
GO:0015031	5	8	protein transport	biological_process	The directed movement of proteins into, out of or within a cell, or between cells, by means of some agent such as a transporter or pore. [GOC:ai]	4	GO:0009306;GO:0015031;GO:0035735;GO:0042073	3	F1SJ46;F1RNN4;F1SED4	F1SJ46(GO:0015031);F1RNN4(GO:0035735;GO:0042073;GO:0042073);F1SED4(GO:0009306)
GO:0030176	5	7	integral component of endoplasmic reticulum membrane	cellular_component	The component of the endoplasmic reticulum membrane consisting of the gene products and protein complexes having at least some part of their peptide sequence embedded in the hydrophobic region of the membrane. [GOC:dos, GOC:mah]	3	GO:0071458;GO:0071556;GO:0030176	2	F1S8G9;F1SED4	F1S8G9(GO:0071458;GO:0071556);F1SED4(GO:0030176)
GO:1905214	5	5	regulation of RNA binding	biological_process	Any process that modulates the frequency, rate or extent of RNA binding. [GO_REF:0000059, GOC:bf, GOC:PARL, GOC:TermGenie]	1	GO:1903839	1	C9E1C9	C9E1C9(GO:1903839)
GO:0001085	5	5	RNA polymerase II transcription factor binding	molecular_function	Interacting selectively and non-covalently with an RNA polymerase II transcription factor, any protein required to initiate or regulate transcription by RNA polymerase II. [GOC:txnOH]	1	GO:0001096	1	F1RWS7	F1RWS7(GO:0001096)
GO:0071241	5	5	cellular response to inorganic substance	biological_process	Any process that results in a change in state or activity of a cell (in terms of movement, secretion, enzyme production, gene expression, etc.) as a result of an inorganic substance stimulus. [GOC:mah]	1	GO:0071294	1	P79379	P79379(GO:0071294)
GO:0080135	5	6	regulation of cellular response to stress	biological_process	Any process that modulates the frequency, rate or extent of a cellular response to stress. Cellular response to stress is a change in state or activity of a cell (in terms of movement, secretion, enzyme production, gene expression, etc.) as a result of a stimulus indicating the organism is under stress. The stress is usually, but not necessarily, exogenous (e.g. temperature, humidity, ionizing ra…	1	GO:0006282	1	C9E1C9	C9E1C9(GO:0006282)
GO:0030031	5	5	cell projection assembly	biological_process	Formation of a prolongation or process extending from a cell, e.g. a flagellum or axon. [GOC:jl, GOC:mah, http://www.cogsci.princeton.edu/~wn/]	2	GO:1905515;GO:0060271	2	F1RNN4;I3LPC6	F1RNN4(GO:0060271;GO:0060271;GO:0060271);I3LPC6(GO:0060271;GO:0060271;GO:0060271;GO:1905515)
GO:0051084	5	5	'de novo' posttranslational protein folding	biological_process	The process of assisting in the correct noncovalent folding of newly formed polypeptides or folding intermediates of polypeptides that have exited the ribosome and/or have been stabilized and transferred by other chaperone proteins. This process could involve several cycles of ATP hydrolysis. [GOC:rb]	1	GO:0051084	1	F1RP50	F1RP50(GO:0051084)
GO:0080134	5	5	regulation of response to stress	biological_process	Any process that modulates the frequency, rate or extent of a response to stress. Response to stress is a change in state or activity of a cell or an organism (in terms of movement, secretion, enzyme production, gene expression, etc.) as a result of a disturbance in organismal or cellular homeostasis, usually, but not necessarily, exogenous (e.g. temperature, humidity, ionizing radiation). [GOC:d…	4	GO:0034157;GO:0006282;GO:0061045;GO:0034165	3	K7GKY0;C9E1C9;F1S9L2	K7GKY0(GO:0061045);C9E1C9(GO:0006282);F1S9L2(GO:0034157;GO:0034165)
GO:0061025	5	5	membrane fusion	biological_process	The membrane organization process that joins two lipid bilayers to form a single membrane. [GOC:dph, GOC:tb]	1	GO:0061025	1	K7GKN2	K7GKN2(GO:0061025)
GO:0009792	5	6	embryo development ending in birth or egg hatching	biological_process	The process whose specific outcome is the progression of an embryo over time, from zygote formation until the end of the embryonic life stage. The end of the embryonic life stage is organism-specific and may be somewhat arbitrary; for mammals it is usually considered to be birth, for insects the hatching of the first instar larva from the eggshell. [GOC:go_curators, GOC:isa_complete, GOC:mtg_sens…	1	GO:0001701	1	F1RU26	F1RU26(GO:0001701)
GO:0044798	5	6	nuclear transcription factor complex	cellular_component	A protein complex, located in the nucleus, that is capable of associating with DNA by direct binding, or via other DNA-binding proteins or complexes, and regulating transcription. [GOC:jl]	1	GO:0005675	1	F6Q8T7	F6Q8T7(GO:0005675;GO:0005675;GO:0005675)
GO:0009894	5	5	regulation of catabolic process	biological_process	Any process that modulates the frequency, rate, or extent of the chemical reactions and pathways resulting in the breakdown of substances. [GOC:go_curators]	2	GO:0031998;GO:0010506	2	I3LF05;F1SUE6	I3LF05(GO:0010506);F1SUE6(GO:0031998;GO:0031998)
GO:0009892	5	5	negative regulation of metabolic process	biological_process	Any process that stops, prevents, or reduces the frequency, rate or extent of the chemical reactions and pathways within a cell or an organism. [GOC:go_curators]	5	GO:0010951;GO:1900364;GO:0001933;GO:0010466;GO:2000117	3	K7GKY0;C9E1C9;Q0Z8R0	K7GKY0(GO:0001933;GO:0010951);C9E1C9(GO:1900364);Q0Z8R0(GO:0010466;GO:2000117)
GO:0009893	5	5	positive regulation of metabolic process	biological_process	Any process that activates or increases the frequency, rate or extent of the chemical reactions and pathways within a cell or an organism. [GOC:go_curators]	6	GO:2001168;GO:0033129;GO:0010628;GO:0045737;GO:2000144;GO:0045944	6	C9E1C9;F1RP31;F1RU26;F1SEA5;F6Q8T7;I3LM88	C9E1C9(GO:0033129;GO:0033129;GO:0045944;GO:0045944;GO:2001168;GO:2001168);F1RP31(GO:0045944);F1RU26(GO:2000144);F1SEA5(GO:0010628);F6Q8T7(GO:0045737;GO:0045944);I3LM88(GO:0045944)
GO:0006873	5	7	cellular ion homeostasis	biological_process	Any process involved in the maintenance of an internal steady state of ions at the level of a cell. [GOC:mah]	2	GO:0051480;GO:0006882	2	P79379;Q06A97	P79379(GO:0006882);Q06A97(GO:0051480)
GO:0007006	5	6	mitochondrial membrane organization	biological_process	A process that is carried out at the cellular level which results in the assembly, arrangement of constituent parts, or disassembly of a mitochondrial membrane, either of the lipid bilayer surrounding a mitochondrion. [GOC:ai, GOC:dph, GOC:jl, GOC:mah]	1	GO:0097345	1	I3LDJ9	I3LDJ9(GO:0097345)
GO:0007005	5	5	mitochondrion organization	biological_process	A process that is carried out at the cellular level which results in the assembly, arrangement of constituent parts, or disassembly of a mitochondrion; includes mitochondrial morphogenesis and distribution, and replication of the mitochondrial genome as well as synthesis of new mitochondrial components. [GOC:dph, GOC:jl, GOC:mah, GOC:sgd_curators, PMID:9786946]	2	GO:0000266;GO:0097345	2	I3LDJ9;K7GKN2	I3LDJ9(GO:0097345);K7GKN2(GO:0000266)
GO:0010212	5	5	response to ionizing radiation	biological_process	Any process that results in a change in state or activity of a cell or an organism (in terms of movement, secretion, enzyme production, gene expression, etc.) as a result of a ionizing radiation stimulus. Ionizing radiation is radiation with sufficient energy to remove electrons from atoms and may arise from spontaneous decay of unstable isotopes, resulting in alpha and beta particles and gamma r…	1	GO:0010212	1	F1SNA6	F1SNA6(GO:0010212)
GO:0016301	5	5	kinase activity	molecular_function	Catalysis of the transfer of a phosphate group, usually from ATP, to a substrate molecule. [ISBN:0198506732]	6	GO:0016301;GO:0004674;GO:0004550;GO:0004672;GO:0004693;GO:0008353	5	I3LT15;F1RPV8;F6Q8T7;C9E1C9;G9BWQ2	I3LT15(GO:0004672;GO:0004674);F1RPV8(GO:0004550);F6Q8T7(GO:0008353);C9E1C9(GO:0004672;GO:0004674;GO:0004693;GO:0004693;GO:0008353;GO:0008353;GO:0008353);G9BWQ2(GO:0004672;GO:0004674;GO:0004674;GO:0004674;GO:0016301)
GO:0070925	5	5	organelle assembly	biological_process	The aggregation, arrangement and bonding together of a set of components to form an organelle. An organelle is an organized structure of distinctive morphology and function. Includes the nucleus, mitochondria, plastids, vacuoles, vesicles, ribosomes and the cytoskeleton. Excludes the plasma membrane. [GOC:mah]	2	GO:1905515;GO:0060271	2	F1RNN4;I3LPC6	F1RNN4(GO:0060271;GO:0060271;GO:0060271);I3LPC6(GO:0060271;GO:0060271;GO:0060271;GO:1905515)
GO:0098742	5	5	cell-cell adhesion via plasma-membrane adhesion molecules	biological_process	The attachment of one cell to another cell via adhesion molecules that are at least partially embedded in the plasma membrane. [GOC:dos]	1	GO:0007156	1	F1SP42	F1SP42(GO:0007156)
GO:0070062	5	6	extracellular exosome	cellular_component	A vesicle that is released into the extracellular region by fusion of the limiting endosomal membrane of a multivesicular body with the plasma membrane. Extracellular exosomes, also simply called exosomes, have a diameter of about 40-100 nm. [GOC:BHF, GOC:mah, GOC:vesicles, PMID:15908444, PMID:17641064, PMID:19442504, PMID:19498381, PMID:22418571, PMID:24009894]	1	GO:0070062	1	F1S5K2	F1S5K2(GO:0070062)
GO:0016818	5	5	hydrolase activity, acting on acid anhydrides, in phosphorus-containing anhydrides	molecular_function	Catalysis of the hydrolysis of any acid anhydride which contains phosphorus. [GOC:jl]	6	GO:0008094;GO:0016818;GO:0003924;GO:0004004;GO:0004386;GO:0016887	5	F1RFL5;F1SJG5;F6Q8T7;K7GKN2;I3LM88	F1RFL5(GO:0004004;GO:0004386);F1SJG5(GO:0016887);F6Q8T7(GO:0008094);K7GKN2(GO:0003924;GO:0003924;GO:0003924);I3LM88(GO:0016818;GO:0016887)
GO:0060627	5	6	regulation of vesicle-mediated transport	biological_process	Any process that modulates the rate, frequency, or extent of vesicle-mediated transport, the directed movement of substances, either within a vesicle or in the vesicle membrane, into, out of or within a cell. [GOC:dph, GOC:tb]	3	GO:2000369;GO:0003400;GO:0030100	3	I3LT15;F1RXZ6;F1SED4	I3LT15(GO:2000369);F1RXZ6(GO:0030100);F1SED4(GO:0003400)
GO:0072675	5	6	osteoclast fusion	biological_process	The plasma membrane fusion process that results in fusion of mononuclear osteoclasts to form a multinuclear osteoclast. [CL:0000092, CL:0000779, GOC:BHF, GOC:mah, PMID:12713016]	1	GO:0072675	1	K7GKY0	K7GKY0(GO:0072675)
GO:0030695	5	5	GTPase regulator activity	molecular_function	Modulates the rate of GTP hydrolysis by a GTPase. [GOC:mah]	2	GO:0005090;GO:0005096	1	F1SED4	F1SED4(GO:0005090;GO:0005096)
GO:0071824	5	5	protein-DNA complex subunit organization	biological_process	Any process in which macromolecules aggregate, disaggregate, or are modified, resulting in the formation, disassembly, or alteration of a protein-DNA complex. [GOC:mah]	2	GO:0006334;GO:0006335	1	F1S7L7	F1S7L7(GO:0006334;GO:0006335)
GO:0071822	5	5	protein complex subunit organization	biological_process	Any process in which macromolecules aggregate, disaggregate, or are modified, resulting in the formation, disassembly, or alteration of a protein complex. [GOC:mah]	2	GO:0003374;GO:0051260	2	K7GKN2;F1SUE6	K7GKN2(GO:0003374);F1SUE6(GO:0051260)
GO:0002684	5	5	positive regulation of immune system process	biological_process	Any process that activates or increases the frequency, rate, or extent of an immune system process. [GOC:add]	3	GO:0034157;GO:2000553;GO:0034165	1	F1S9L2	F1S9L2(GO:0034157;GO:0034165;GO:2000553)
GO:1901657	5	5	glycosyl compound metabolic process	biological_process	The chemical reactions and pathways involving glycosyl compound. [GOC:pr, GOC:TermGenie]	3	GO:0006228;GO:0006241;GO:0006183	1	F1RPV8	F1RPV8(GO:0006183;GO:0006228;GO:0006241)
GO:0019932	5	7	second-messenger-mediated signaling	biological_process	Any intracellular signal transduction in which the signal is passed on within the cell via a second messenger; a small molecule or ion that can be quickly generated or released from intracellular stores, and can diffuse within the cell. Second-messenger signaling includes production or release of the second messenger, and effectors downstream of the second messenger that further transmit the sign…	1	GO:0007263	1	P79379	P79379(GO:0007263)
GO:0003723	5	5	RNA binding	molecular_function	Interacting selectively and non-covalently with an RNA molecule or a portion thereof. [GOC:jl, GOC:mah]	3	GO:0017069;GO:0003723;GO:0097322	6	C9E1C9;F1SJQ4;F1RFL5;F1SBX8;F1SEA5;I3LM88	C9E1C9(GO:0017069;GO:0097322);F1SJQ4(GO:0003723;GO:0003723;GO:0003723);F1RFL5(GO:0003723;GO:0003723);F1SBX8(GO:0003723);F1SEA5(GO:0003723);I3LM88(GO:0003723)
GO:0006886	5	9	intracellular protein transport	biological_process	The directed movement of proteins in a cell, including the movement of proteins between specific compartments or structures within a cell, such as organelles of a eukaryotic cell. [GOC:mah]	2	GO:0035735;GO:0042073	1	F1RNN4	F1RNN4(GO:0035735;GO:0042073;GO:0042073)
GO:0016070	5	7	RNA metabolic process	biological_process	The cellular chemical reactions and pathways involving RNA, ribonucleic acid, one of the two main type of nucleic acid, consisting of a long, unbranched macromolecule formed from ribonucleotides joined in 3',5'-phosphodiester linkage. [ISBN:0198506732]	11	GO:0016180;GO:0090502;GO:0000154;GO:0030490;GO:0006364;GO:0031167;GO:0006366;GO:0006368;GO:0010501;GO:0061614;GO:0006351	10	F1RHJ0;C9E1C9;F1RP31;F1RFL5;F1SBX8;F1RFZ6;F1STY6;F6Q8T7;F1RU26;I3LM88	F1RHJ0(GO:0000154;GO:0031167);C9E1C9(GO:0006368);F1RP31(GO:0006351;GO:0006351);F1RFL5(GO:0010501);F1SBX8(GO:0090502);F1RFZ6(GO:0006364;GO:0006364;GO:0030490);F1STY6(GO:0016180);F6Q8T7(GO:0006366);F1RU26(GO:0061614);I3LM88(GO:0006366)
GO:0030182	5	5	neuron differentiation	biological_process	The process in which a relatively unspecialized cell acquires specialized features of a neuron. [GOC:mah]	1	GO:0021522	1	I3LPC6	I3LPC6(GO:0021522)
GO:0004722	5	8	protein serine/threonine phosphatase activity	molecular_function	Catalysis of the reaction: protein serine phosphate + H2O = protein serine + phosphate, and protein threonine phosphate + H2O = protein threonine + phosphate. [GOC:bf]	1	GO:0008420	1	F1RWS7	F1RWS7(GO:0008420;GO:0008420)
GO:0009267	5	7	cellular response to starvation	biological_process	Any process that results in a change in state or activity of a cell (in terms of movement, secretion, enzyme production, gene expression, etc.) as a result of deprivation of nourishment. [GOC:jl]	1	GO:0034198	1	I3LF05	I3LF05(GO:0034198)
GO:0004521	5	7	endoribonuclease activity	molecular_function	Catalysis of the hydrolysis of ester linkages within ribonucleic acid by creating internal breaks. [GOC:mah, ISBN:0198547684]	1	GO:0033897	1	F1SBX8	F1SBX8(GO:0033897)
GO:1901565	5	5	organonitrogen compound catabolic process	biological_process	The chemical reactions and pathways resulting in the breakdown of organonitrogen compound. [GOC:pr, GOC:TermGenie]	1	GO:0071712	1	F1RP50	F1RP50(GO:0071712)
GO:1901566	5	5	organonitrogen compound biosynthetic process	biological_process	The chemical reactions and pathways resulting in the formation of organonitrogen compound. [GOC:pr, GOC:TermGenie]	4	GO:0006228;GO:0006241;GO:0006412;GO:0006183	2	F1RPV8;I3LTC4	F1RPV8(GO:0006183;GO:0006228;GO:0006241);I3LTC4(GO:0006412)
GO:0001221	5	5	transcription cofactor binding	molecular_function	Interacting selectively and non-covalently with a transcription cofactor, any protein involved in regulation of transcription via protein-protein interactions with transcription factors and other transcription regulatory proteins. Cofactors do not bind DNA directly, but rather mediate protein-protein interactions between regulatory transcription factors and the basal transcription machinery. [GOC…	1	GO:0001223	1	C9E1C9	C9E1C9(GO:0001223)
GO:0001228	5	5	transcriptional activator activity, RNA polymerase II transcription regulatory region sequence-specific binding	molecular_function	Interacting selectively and non-covalently with a sequence of DNA that is in the transcription regulatory region for RNA polymerase II (RNAP II) in order to activate or increase the frequency, rate or extent of transcription from the RNAP II promoter. [GOC:krc]	1	GO:0001077	1	I3LM88	I3LM88(GO:0001077)
GO:0010243	5	5	response to organonitrogen compound	biological_process	Any process that results in a change in state or activity of a cell or an organism (in terms of movement, secretion, enzyme production, gene expression, etc.) as a result of an organonitrogen stimulus. An organonitrogen compound is formally a compound containing at least one carbon-nitrogen bond. [CHEBI:35352, PMID:9869419]	1	GO:0071712	1	F1RP50	F1RP50(GO:0071712)
GO:0031410	5	6	cytoplasmic vesicle	cellular_component	A vesicle found in the cytoplasm of a cell. [GOC:ai, GOC:mah, GOC:vesicles]	1	GO:0031410	1	Q06A97	Q06A97(GO:0031410)
GO:0001883	5	5	purine nucleoside binding	molecular_function	Interacting selectively and non-covalently with a purine nucleoside, a compound consisting of a purine base linked either to ribose or deoxyribose. [GOC:hjd]	1	GO:0005525	1	K7GKN2	K7GKN2(GO:0005525;GO:0005525)
GO:0021591	5	5	ventricular system development	biological_process	The process whose specific outcome is the progression of the brain ventricular system over time, from its formation to the mature structure. The brain ventricular system consists of four communicating cavities within the brain that are continuous with the central canal of the spinal cord. These cavities include two lateral ventricles, the third ventricle and the fourth ventricle. Cerebrospinal fl…	1	GO:0021591	1	F6Q8T7	F6Q8T7(GO:0021591)
GO:0000922	5	6	spindle pole	cellular_component	Either of the ends of a spindle, where spindle microtubules are organized; usually contains a microtubule organizing center and accessory molecules, spindle microtubules and astral microtubules. [GOC:clt]	1	GO:0000922	1	F1RWS7	F1RWS7(GO:0000922)
GO:0048585	5	5	negative regulation of response to stimulus	biological_process	Any process that stops, prevents, or reduces the frequency, rate or extent of a response to a stimulus. Response to stimulus is a change in state or activity of a cell or an organism (in terms of movement, secretion, enzyme production, gene expression, etc.) as a result of a stimulus. [GOC:jid]	2	GO:0030512;GO:0061045	1	K7GKY0	K7GKY0(GO:0030512;GO:0061045)
GO:0048584	5	5	positive regulation of response to stimulus	biological_process	Any process that activates, maintains or increases the rate of a response to a stimulus. Response to stimulus is a change in state or activity of a cell or an organism (in terms of movement, secretion, enzyme production, gene expression, etc.) as a result of a stimulus. [GOC:jid]	6	GO:2000553;GO:0034165;GO:0034157;GO:0045747;GO:0045880;GO:0032008	4	I3LT15;I3LF05;I3LPC6;F1S9L2	I3LT15(GO:0045747);I3LF05(GO:0032008);I3LPC6(GO:0045880);F1S9L2(GO:0034157;GO:0034165;GO:2000553)
GO:0060255	5	5	regulation of macromolecule metabolic process	biological_process	Any process that modulates the frequency, rate or extent of the chemical reactions and pathways involving macromolecules, any molecule of high relative molecular mass, the structure of which essentially comprises the multiple repetition of units derived, actually or conceptually, from molecules of low relative molecular mass. [GOC:dph, GOC:tb]	20	GO:2001168;GO:0000079;GO:0045737;GO:0006282;GO:0006357;GO:1900364;GO:0033129;GO:0043923;GO:0070816;GO:0006355;GO:0010628;GO:0045944;GO:0051438;GO:2000117;GO:0031056;GO:0010951;GO:0070940;GO:0001933;GO:0010466;GO:2000144	12	C9E1C9;Q0Z8R0;F1RP31;F1SG36;K7GKY0;F1RU26;F1RWS7;F1SJG5;F1SEA5;F1S6I1;F6Q8T7;I3LM88	C9E1C9(GO:0006282;GO:0031056;GO:0033129;GO:0033129;GO:0045944;GO:0045944;GO:0070816;GO:1900364;GO:2001168;GO:2001168);Q0Z8R0(GO:0010466;GO:2000117);F1RP31(GO:0006355;GO:0006355;GO:0045944);F1SG36(GO:0006355);K7GKY0(GO:0001933;GO:0010951);F1RU26(GO:0006355;GO:0006357;GO:2000144);F1RWS7(GO:0043923;GO:0070940);F1SJG5(GO:0006355);F1SEA5(GO:0010628);F1S6I1(GO:0051438);F6Q8T7(GO:0000079;GO:0006355;GO:0…
GO:0031497	5	6	chromatin assembly	biological_process	The assembly of DNA, histone proteins, other associated proteins, and sometimes RNA, into chromatin structure, beginning with the formation of the basic unit, the nucleosome, followed by organization of the nucleosomes into higher order structures, ultimately giving rise to a complex organization of specific domains within the nucleus. [http://www.infobiogen.fr/services/chromcancer/IntroItems/Chr…	1	GO:0031497	1	F1S7L7	F1S7L7(GO:0031497)
GO:0021515	5	5	cell differentiation in spinal cord	biological_process	The process in which relatively unspecialized cells acquire specialized structural and/or functional features that characterize the cells of the spinal cord. Differentiation includes the processes involved in commitment of a cell to a specific fate. [GO_REF:0000021, GOC:cls, GOC:dgh, GOC:dph, GOC:jid, GOC:mtg_15jun06, PMID:11262869]	1	GO:0021522	1	I3LPC6	I3LPC6(GO:0021522)
GO:0019887	5	5	protein kinase regulator activity	molecular_function	Modulates the activity of a protein kinase, an enzyme which phosphorylates a protein. [GOC:ai]	1	GO:0061575	1	F6Q8T7	F6Q8T7(GO:0061575)
GO:0006338	5	5	chromatin remodeling	biological_process	Dynamic structural changes to eukaryotic chromatin occurring throughout the cell division cycle. These changes range from the local changes necessary for transcriptional regulation to global changes necessary for chromosome segregation. [GOC:jid, GOC:vw, PMID:12697820]	1	GO:0006338	1	F1SJG5	F1SJG5(GO:0006338)
GO:0006333	5	5	chromatin assembly or disassembly	biological_process	The formation or destruction of chromatin structures. [GOC:mah]	2	GO:0006335;GO:0031497	1	F1S7L7	F1S7L7(GO:0006335;GO:0031497)
GO:0006486	5	8	protein glycosylation	biological_process	A protein modification process that results in the addition of a carbohydrate or carbohydrate derivative unit to a protein amino acid, e.g. the addition of glycan chains to proteins. [GOC:curators, GOC:pr]	3	GO:0033578;GO:0018279;GO:0006486	2	F1SA54;F1RP50	F1SA54(GO:0006486;GO:0033578);F1RP50(GO:0006486;GO:0018279)
GO:0051051	5	6	negative regulation of transport	biological_process	Any process that stops, prevents, or reduces the frequency, rate or extent of the directed movement of substances (such as macromolecules, small molecules, ions) into, out of or within a cell, or between cells, by means of some agent such as a transporter or pore. [GOC:ai]	2	GO:1901253;GO:0050709	2	K7GKN2;F1S9L2	K7GKN2(GO:1901253);F1S9L2(GO:0050709)
GO:0042254	5	5	ribosome biogenesis	biological_process	A cellular process that results in the biosynthesis of constituent macromolecules, assembly, and arrangement of constituent parts of ribosome subunits; includes transport to the sites of protein synthesis. [GOC:ma]	1	GO:0042254	1	F1RFZ6	F1RFZ6(GO:0042254)
GO:0003779	5	5	actin binding	molecular_function	Interacting selectively and non-covalently with monomeric or multimeric forms of actin, including actin filaments. [GOC:clt]	1	GO:0003779	2	I3LH80;Q767M0	I3LH80(GO:0003779);Q767M0(GO:0003779)
GO:0044089	5	5	positive regulation of cellular component biogenesis	biological_process	Any process that activates or increases the frequency, rate or extent of cellular component biogenesis, a process that results in the biosynthesis of constituent macromolecules, assembly, and arrangement of constituent parts of a cellular component. [GOC:jl]	1	GO:2000144	1	F1RU26	F1RU26(GO:2000144)
GO:1903530	5	7	regulation of secretion by cell	biological_process	Any process that modulates the frequency, rate or extent of secretion by cell. [GO_REF:0000058, GOC:pm, GOC:TermGenie, PMID:12130530]	1	GO:0050709	1	F1S9L2	F1S9L2(GO:0050709)
GO:0009059	5	5	macromolecule biosynthetic process	biological_process	The chemical reactions and pathways resulting in the formation of a macromolecule, any molecule of high relative molecular mass, the structure of which essentially comprises the multiple repetition of units derived, actually or conceptually, from molecules of low relative molecular mass. [CHEBI:33694, GOC:mah]	5	GO:0006368;GO:0006412;GO:0006351;GO:0061614;GO:0006366	6	I3LTC4;C9E1C9;F1RP31;F1RU26;F6Q8T7;I3LM88	I3LTC4(GO:0006412);C9E1C9(GO:0006368);F1RP31(GO:0006351;GO:0006351);F1RU26(GO:0061614);F6Q8T7(GO:0006366);I3LM88(GO:0006366)
GO:0009057	5	5	macromolecule catabolic process	biological_process	The chemical reactions and pathways resulting in the breakdown of a macromolecule, any molecule of high relative molecular mass, the structure of which essentially comprises the multiple repetition of units derived, actually or conceptually, from molecules of low relative molecular mass. [CHEBI:33694, GOC:mah]	1	GO:0071712	1	F1RP50	F1RP50(GO:0071712)
GO:0034645	5	6	cellular macromolecule biosynthetic process	biological_process	The chemical reactions and pathways resulting in the formation of a macromolecule, any molecule of high relative molecular mass, the structure of which essentially comprises the multiple repetition of units derived, actually or conceptually, from molecules of low relative molecular mass, carried out by individual cells. [CHEBI:33694, GOC:mah]	4	GO:0006412;GO:0006351;GO:0061614;GO:0006366	5	F1RU26;I3LTC4;F6Q8T7;I3LM88;F1RP31	F1RU26(GO:0061614);I3LTC4(GO:0006412);F6Q8T7(GO:0006366);I3LM88(GO:0006366);F1RP31(GO:0006351;GO:0006351)
GO:0007507	5	5	heart development	biological_process	The process whose specific outcome is the progression of the heart over time, from its formation to the mature structure. The heart is a hollow, muscular organ, which, by contracting rhythmically, keeps up the circulation of the blood. [GOC:jid, UBERON:0000948]	2	GO:0007507;GO:0007512	2	F6Q8T7;I3LPC6	F6Q8T7(GO:0007512);I3LPC6(GO:0007507)
GO:0004553	5	5	hydrolase activity, hydrolyzing O-glycosyl compounds	molecular_function	Catalysis of the hydrolysis of any O-glycosyl bond. [GOC:mah]	1	GO:0004649	1	F1SDW4	F1SDW4(GO:0004649)
GO:2000026	5	5	regulation of multicellular organismal development	biological_process	Any process that modulates the frequency, rate or extent of multicellular organismal development. [GOC:obol]	3	GO:0030500;GO:0045616;GO:1904179	3	I3LT15;K7GKY0;G9BWQ2	I3LT15(GO:0030500);K7GKY0(GO:0045616);G9BWQ2(GO:1904179)
GO:0002020	5	5	protease binding	molecular_function	Interacting selectively and non-covalently with any protease or peptidase. [GOC:hjd]	1	GO:0002020	2	F1SUE6;Q0Z8R0	F1SUE6(GO:0002020);Q0Z8R0(GO:0002020)
GO:0005856	5	6	cytoskeleton	cellular_component	Any of the various filamentous elements that form the internal framework of cells, and typically remain after treatment of the cells with mild detergent to remove membrane constituents and soluble components of the cytoplasm. The term embraces intermediate filaments, microfilaments, microtubules, the microtrabecular lattice, and other structures characterized by a polymeric filamentous nature and…	2	GO:0005856;GO:0015629	2	F1RWS7;Q767M0	F1RWS7(GO:0015629);Q767M0(GO:0005856;GO:0005856)
GO:0043086	5	5	negative regulation of catalytic activity	biological_process	Any process that stops or reduces the activity of an enzyme. [GOC:ebc, GOC:jl, GOC:tb, GOC:vw]	3	GO:0010951;GO:2000117;GO:0010466	2	K7GKY0;Q0Z8R0	K7GKY0(GO:0010951);Q0Z8R0(GO:0010466;GO:2000117)
GO:0043085	5	5	positive regulation of catalytic activity	biological_process	Any process that activates or increases the activity of an enzyme. [GOC:ebc, GOC:jl, GOC:tb, GOC:vw]	2	GO:0045737;GO:0043547	2	F6Q8T7;F1SED4	F6Q8T7(GO:0045737);F1SED4(GO:0043547)
GO:0070986	5	5	left/right axis specification	biological_process	The establishment, maintenance and elaboration of the left/right axis. The left/right axis is defined by a line that runs orthogonal to both the anterior/posterior and dorsal/ventral axes. Each side is defined from the viewpoint of the organism rather of the observer (as per anatomical axes). [GOC:dph, GOC:gvg, GOC:mah]	1	GO:0070986	1	I3LPC6	I3LPC6(GO:0070986)
GO:0006796	5	5	phosphate-containing compound metabolic process	biological_process	The chemical reactions and pathways involving the phosphate group, the anion or salt of any phosphoric acid. [GOC:ai]	10	GO:0006468;GO:0018105;GO:0070940;GO:0006228;GO:0006470;GO:0070816;GO:0006241;GO:0006165;GO:0016310;GO:0006183	6	F1RPV8;C9E1C9;I3LT15;G9BWQ2;F1RWS7;F6Q8T7	F1RPV8(GO:0006165;GO:0006183;GO:0006228;GO:0006241);C9E1C9(GO:0006468;GO:0006468;GO:0070816);I3LT15(GO:0006468;GO:0006468);G9BWQ2(GO:0006468;GO:0016310;GO:0018105);F1RWS7(GO:0006470;GO:0070940);F6Q8T7(GO:0006468)
GO:0008168	5	5	methyltransferase activity	molecular_function	Catalysis of the transfer of a methyl group to an acceptor molecule. [ISBN:0198506732]	2	GO:0000179;GO:0008649	1	F1RHJ0	F1RHJ0(GO:0000179;GO:0008649)
GO:0055029	5	8	nuclear DNA-directed RNA polymerase complex	cellular_component	A protein complex, located in the nucleus, that possesses DNA-directed RNA polymerase activity. [GOC:mtg_sensu]	1	GO:0016591	1	F1RWS7	F1RWS7(GO:0016591)
GO:0048471	5	5	perinuclear region of cytoplasm	cellular_component	Cytoplasm situated near, or occurring around, the nucleus. [GOC:jid]	1	GO:0048471	2	P79379;K7GKN2	P79379(GO:0048471);K7GKN2(GO:0048471)
GO:0021915	5	6	neural tube development	biological_process	The process whose specific outcome is the progression of the neural tube over time, from its formation to the mature structure. The mature structure of the neural tube exists when the tube has been segmented into the forebrain, midbrain, hindbrain and spinal cord regions. In addition neural crest has budded away from the epithelium. [GO_REF:0000021, GOC:cls, GOC:dgh, GOC:dph, GOC:jid, GOC:mtg_15j…	1	GO:0021915	1	I3LPC6	I3LPC6(GO:0021915)
GO:0042127	5	5	regulation of cell proliferation	biological_process	Any process that modulates the frequency, rate or extent of cell proliferation. [GOC:jl]	2	GO:0050680;GO:0010839	2	K7GKY0;I3LPC6	K7GKY0(GO:0010839);I3LPC6(GO:0050680)
GO:0031461	5	6	cullin-RING ubiquitin ligase complex	cellular_component	Any ubiquitin ligase complex in which the catalytic core consists of a member of the cullin family and a RING domain protein; the core is associated with one or more additional proteins that confer substrate specificity. [PMID:15571813, PMID:15688063]	2	GO:0031462;GO:0005680	2	F1S6I1;I3L7Q8	F1S6I1(GO:0031462);I3L7Q8(GO:0005680)
GO:0044267	5	6	cellular protein metabolic process	biological_process	The chemical reactions and pathways involving a specific protein, rather than of proteins in general, occurring at the level of an individual cell. Includes cellular protein modification. [GOC:jl]	11	GO:0006468;GO:0018105;GO:0070940;GO:0006486;GO:0070979;GO:0006470;GO:0070816;GO:0006412;GO:0016567;GO:0033578;GO:0018279	10	I3LTC4;C9E1C9;I3LT15;G9BWQ2;F1RWS7;F1RP50;I3L7Q8;F1S6I1;F6Q8T7;F1SA54	I3LTC4(GO:0006412);C9E1C9(GO:0006468;GO:0006468;GO:0070816);I3LT15(GO:0006468;GO:0006468);G9BWQ2(GO:0006468;GO:0018105);F1RWS7(GO:0006470;GO:0070940);F1RP50(GO:0006486;GO:0018279);I3L7Q8(GO:0070979);F1S6I1(GO:0016567);F6Q8T7(GO:0006468);F1SA54(GO:0006486;GO:0033578)
GO:0072521	5	5	purine-containing compound metabolic process	biological_process	The chemical reactions and pathways involving a purine-containing compound, i.e. any compound that contains purine or a formal derivative thereof. [CHEBI:26401, GOC:mah]	1	GO:0006183	1	F1RPV8	F1RPV8(GO:0006183)
GO:0051648	5	5	vesicle localization	biological_process	Any process in which a vesicle or vesicles are transported to, and/or maintained in, a specific location. [GOC:ai]	1	GO:0032439	1	K7GKN2	K7GKN2(GO:0032439)
GO:0016192	5	5	vesicle-mediated transport	biological_process	A cellular transport process in which transported substances are moved in membrane-bounded vesicles; transported substances are enclosed in the vesicle lumen or located in the vesicle membrane. The process begins with a step that directs a substance to the forming vesicle, and includes vesicle budding and coating. Vesicles are then targeted to, and fuse with, an acceptor membrane. [GOC:ai, GOC:ma…	1	GO:0006898	1	E7CXS1	E7CXS1(GO:0006898)
GO:1904950	5	7	negative regulation of establishment of protein localization	biological_process	Any process that stops, prevents or reduces the frequency, rate or extent of establishment of protein localization. [GO_REF:0000058, GOC:TermGenie, PMID:22761445]	1	GO:0050709	1	F1S9L2	F1S9L2(GO:0050709)
GO:0051851	5	6	modification by host of symbiont morphology or physiology	biological_process	The process in which an organism effects a change in the structure or processes of a symbiont organism. The symbiont is defined as the smaller of the organisms involved in a symbiotic interaction. [GOC:cc]	1	GO:0043923	1	F1RWS7	F1RWS7(GO:0043923)
GO:0048285	5	5	organelle fission	biological_process	The creation of two or more organelles by division of one organelle. [GOC:jid]	1	GO:0000266	1	K7GKN2	K7GKN2(GO:0000266)
GO:0051233	5	6	spindle midzone	cellular_component	The area in the center of the spindle where the spindle microtubules from opposite poles overlap. [GOC:ai, PMID:15296749]	1	GO:0051233	1	F1RWS7	F1RWS7(GO:0051233)
GO:0007224	5	7	smoothened signaling pathway	biological_process	A series of molecular signals generated as a consequence of activation of the transmembrane protein Smoothened. [GOC:mah, PMID:15205520]	1	GO:0007224	1	I3LPC6	I3LPC6(GO:0007224)
GO:0008544	5	5	epidermis development	biological_process	The process whose specific outcome is the progression of the epidermis over time, from its formation to the mature structure. The epidermis is the outer epithelial layer of an animal, it may be a single layer that produces an extracellular material (e.g. the cuticle of arthropods) or a complex stratified squamous epithelium, as in the case of many vertebrate species. [GOC:go_curators, UBERON:0001…	1	GO:0008544	1	I3LPC6	I3LPC6(GO:0008544)
GO:0046903	5	5	secretion	biological_process	The controlled release of a substance by a cell or a tissue. [GOC:ai]	1	GO:0009306	1	F1SED4	F1SED4(GO:0009306)
GO:0046902	5	7	regulation of mitochondrial membrane permeability	biological_process	Any process that modulates the frequency, rate or extent of the passage or uptake of molecules by the mitochondrial membrane. [GOC:bf]	1	GO:0097345	1	I3LDJ9	I3LDJ9(GO:0097345)
GO:0030163	5	6	protein catabolic process	biological_process	The chemical reactions and pathways resulting in the breakdown of a protein by the destruction of the native, active configuration, with or without the hydrolysis of peptide bonds. [GOC:mah]	1	GO:0071712	1	F1RP50	F1RP50(GO:0071712)
GO:0001099	5	5	basal RNA polymerase II transcription machinery binding	molecular_function	Interacting selectively and non-covalently with the basal transcription machinery for RNA polymerase II which is composed of the RNA polymerase II core enzyme, a multisubunit eukaryotic nuclear RNA polymerase typically composed of twelve subunits, and the basal RNA polymerase II transcription factors, the minimal set of factors required for formation of the preinitiation complex (PIC) by the RNA …	1	GO:0001096	1	F1RWS7	F1RWS7(GO:0001096)
GO:0005634	5	6	nucleus	cellular_component	A membrane-bounded organelle of eukaryotic cells in which chromosomes are housed and replicated. In most cells, the nucleus contains all of the cell's chromosomes except the organellar chromosomes, and is the site of RNA synthesis and processing. In some species, or in specialized cell types, RNA metabolism or DNA replication may be absent. [GOC:go_curators]	1	GO:0005634	16	F1SLA2;F1S7L7;F1RP31;F1SG36;P79379;F1RU26;F1SEA5;F1RWS7;I3L7Q8;F1SRJ4;F1SJG5;F1SNA6;Q06A97;C9E1C9;F1RFL5;I3LM88	F1SLA2(GO:0005634);F1S7L7(GO:0005634);F1RP31(GO:0005634;GO:0005634;GO:0005634);F1SG36(GO:0005634);P79379(GO:0005634);F1RU26(GO:0005634);F1SEA5(GO:0005634);F1RWS7(GO:0005634);I3L7Q8(GO:0005634);F1SRJ4(GO:0005634);F1SJG5(GO:0005634);F1SNA6(GO:0005634;GO:0005634);Q06A97(GO:0005634);C9E1C9(GO:0005634);F1RFL5(GO:0005634;GO:0005634);I3LM88(GO:0005634)
GO:0005635	5	6	nuclear envelope	cellular_component	The double lipid bilayer enclosing the nucleus and separating its contents from the rest of the cytoplasm; includes the intermembrane space, a gap of width 20-40 nm (also called the perinuclear space). [ISBN:0198547684]	1	GO:0005635	1	I3LDJ9	I3LDJ9(GO:0005635)
GO:0048878	5	5	chemical homeostasis	biological_process	Any biological process involved in the maintenance of an internal steady state of a chemical. [GOC:isa_complete]	2	GO:0051480;GO:0006882	2	P79379;Q06A97	P79379(GO:0006882);Q06A97(GO:0051480)
GO:0031669	5	6	cellular response to nutrient levels	biological_process	Any process that results in a change in state or activity of a cell (in terms of movement, secretion, enzyme production, gene expression, etc.) as a result of a stimulus reflecting the presence, absence, or concentration of nutrients. [GOC:mah]	1	GO:0034198	1	I3LF05	I3LF05(GO:0034198)
GO:0031667	5	5	response to nutrient levels	biological_process	Any process that results in a change in state or activity of a cell or an organism (in terms of movement, secretion, enzyme production, gene expression, etc.) as a result of a stimulus reflecting the presence, absence, or concentration of nutrients. [GOC:mah]	1	GO:0034198	1	I3LF05	I3LF05(GO:0034198)
GO:0046982	5	5	protein heterodimerization activity	molecular_function	Interacting selectively and non-covalently with a nonidentical protein to form a heterodimer. [GOC:ai]	1	GO:0046982	1	F1SG36	F1SG36(GO:0046982)
GO:0030705	5	6	cytoskeleton-dependent intracellular transport	biological_process	The directed movement of substances along cytoskeletal fibers such as microfilaments or microtubules within a cell. [GOC:mah]	2	GO:0035735;GO:0042073	1	F1RNN4	F1RNN4(GO:0035735;GO:0042073;GO:0042073)
GO:0016758	5	5	transferase activity, transferring hexosyl groups	molecular_function	Catalysis of the transfer of a hexosyl group from one compound (donor) to another (acceptor). [GOC:jl]	2	GO:0008424;GO:0003980	2	F1SA54;F1RP50	F1SA54(GO:0008424;GO:0008424);F1RP50(GO:0003980;GO:0003980)
GO:0044389	5	5	ubiquitin-like protein ligase binding	molecular_function	Interacting selectively and non-covalently with a ubiquitin-like protein ligase, such as ubiquitin-ligase. [GOC:jl]	1	GO:0031625	1	I3LM88	I3LM88(GO:0031625)
GO:0008194	5	5	UDP-glycosyltransferase activity	molecular_function	Catalysis of the transfer of a glycosyl group from a UDP-sugar to a small hydrophobic molecule. [InterPro:IPR004224, PMID:11846783]	1	GO:0003980	1	F1RP50	F1RP50(GO:0003980;GO:0003980)
GO:0099111	5	5	microtubule-based transport	biological_process	A microtubule-based process that results in the transport of organelles, other microtubules, or other cellular components. Examples include motor-driven movement along microtubules and movement driven by polymerization or depolymerization of microtubules. [GOC:cjm, ISBN:0815316194]	2	GO:0035735;GO:0042073	1	F1RNN4	F1RNN4(GO:0035735;GO:0042073;GO:0042073)
GO:0000152	5	6	nuclear ubiquitin ligase complex	cellular_component	A ubiquitin ligase complex found in the nucleus. [GOC:mah]	1	GO:0005680	1	I3L7Q8	I3L7Q8(GO:0005680)
GO:0061695	5	5	transferase complex, transferring phosphorus-containing groups	cellular_component	A transferase complex capable of catalysis of the transfer of a phosphorus-containing group from one compound (donor) to another (acceptor). [GOC:bhm, GOC:dph]	3	GO:0016591;GO:0008024;GO:0005675	3	F1RWS7;C9E1C9;F6Q8T7	F1RWS7(GO:0016591);C9E1C9(GO:0008024;GO:0008024;GO:0008024);F6Q8T7(GO:0005675;GO:0005675;GO:0005675)
GO:0042110	5	6	T cell activation	biological_process	The change in morphology and behavior of a mature or immature T cell resulting from exposure to a mitogen, cytokine, chemokine, cellular ligand, or an antigen for which it is specific. [GOC:mgi_curators, ISBN:0781735140]	2	GO:0043367;GO:0035710	1	F1S9L2	F1S9L2(GO:0035710;GO:0043367)
GO:0007010	5	5	cytoskeleton organization	biological_process	A process that is carried out at the cellular level which results in the assembly, arrangement of constituent parts, or disassembly of cytoskeletal structures. [GOC:dph, GOC:jl, GOC:mah]	3	GO:0007010;GO:0030036;GO:0031122	2	I3LH80;I3LPC6	I3LH80(GO:0007010;GO:0030036);I3LPC6(GO:0031122)
GO:0050776	5	5	regulation of immune response	biological_process	Any process that modulates the frequency, rate or extent of the immune response, the immunological reaction of an organism to an immunogenic stimulus. [GOC:ai]	3	GO:0034157;GO:2000553;GO:0034165	1	F1S9L2	F1S9L2(GO:0034157;GO:0034165;GO:2000553)
GO:0005743	5	7	mitochondrial inner membrane	cellular_component	The inner, i.e. lumen-facing, lipid bilayer of the mitochondrial envelope. It is highly folded to form cristae. [GOC:ai]	1	GO:0005743	3	F1S5K2;I3LTC4;F1S9L2	F1S5K2(GO:0005743);I3LTC4(GO:0005743);F1S9L2(GO:0005743)
GO:0005740	5	6	mitochondrial envelope	cellular_component	The double lipid bilayer enclosing the mitochondrion and separating its contents from the cell cytoplasm; includes the intermembrane space. [GOC:ai, GOC:pz]	1	GO:0005740	1	I3LDJ9	I3LDJ9(GO:0005740)
GO:0005741	5	7	mitochondrial outer membrane	cellular_component	The outer, i.e. cytoplasm-facing, lipid bilayer of the mitochondrial envelope. [GOC:ai]	1	GO:0005741	2	I3LDJ9;F1S9L2	I3LDJ9(GO:0005741);F1S9L2(GO:0005741)
GO:0015934	5	6	large ribosomal subunit	cellular_component	The larger of the two subunits of a ribosome. Two sites on the ribosomal large subunit are involved in translation, namely the aminoacyl site (A site) and peptidyl site (P site). [ISBN:0198506732]	2	GO:0015934;GO:0005762	1	I3LTC4	I3LTC4(GO:0005762;GO:0015934)
GO:0007420	5	5	brain development	biological_process	The process whose specific outcome is the progression of the brain over time, from its formation to the mature structure. Brain development begins with patterning events in the neural tube and ends with the mature structure that is the center of thought and emotion. The brain is responsible for the coordination and control of bodily activities and the interpretation of information from the senses…	1	GO:0007420	1	I3LPC6	I3LPC6(GO:0007420)
GO:0036464	5	7	cytoplasmic ribonucleoprotein granule	cellular_component	A ribonucleoprotein granule located in the cytoplasm. [GOC:bf, GOC:PARL, PMID:15121898]	1	GO:0036464	2	C9E1C9;F1SJQ4	C9E1C9(GO:0036464;GO:0036464);F1SJQ4(GO:0036464)
GO:0048565	5	5	digestive tract development	biological_process	The process whose specific outcome is the progression of the digestive tract over time, from its formation to the mature structure. The digestive tract is the anatomical structure through which food passes and is processed. [GOC:go_curators]	1	GO:0061525	1	I3LPC6	I3LPC6(GO:0061525)
GO:0004674	5	7	protein serine/threonine kinase activity	molecular_function	Catalysis of the reactions: ATP + protein serine = ADP + protein serine phosphate, and ATP + protein threonine = ADP + protein threonine phosphate. [GOC:bf]	3	GO:0004693;GO:0008353;GO:0004674	4	I3LT15;F6Q8T7;C9E1C9;G9BWQ2	I3LT15(GO:0004674);F6Q8T7(GO:0008353);C9E1C9(GO:0004674;GO:0004693;GO:0004693;GO:0008353;GO:0008353;GO:0008353);G9BWQ2(GO:0004674;GO:0004674;GO:0004674)
GO:0007219	5	7	Notch signaling pathway	biological_process	A series of molecular signals initiated by the binding of an extracellular ligand to the receptor Notch on the surface of a target cell, and ending with regulation of a downstream cellular process, e.g. transcription. [GOC:go_curators, GOC:signaling]	1	GO:0007219	1	I3LPC6	I3LPC6(GO:0007219)
GO:0070087	5	5	chromo shadow domain binding	molecular_function	Interacting selectively and non-covalently with a chromo shadow domain, a protein domain that is distantly related, and found in association with, the chromo domain. [GOC:BHF, GOC:vk, InterPro:IPR008251, PMID:7667093]	1	GO:0070087	1	F1S7L7	F1S7L7(GO:0070087)
GO:0008236	5	6	serine-type peptidase activity	molecular_function	Catalysis of the hydrolysis of peptide bonds in a polypeptide chain by a catalytic mechanism that involves a catalytic triad consisting of a serine nucleophile that is activated by a proton relay involving an acidic residue (e.g. aspartate or glutamate) and a basic residue (usually histidine). [http://merops.sanger.ac.uk/about/glossary.htm#CATTYPE, ISBN:0716720094]	1	GO:0004252	1	F1SUE6	F1SUE6(GO:0004252;GO:0004252)
GO:0019900	5	5	kinase binding	molecular_function	Interacting selectively and non-covalently with a kinase, any enzyme that catalyzes the transfer of a phosphate group. [GOC:jl]	1	GO:0019901	1	C9E1C9	C9E1C9(GO:0019901)
GO:0019902	5	5	phosphatase binding	molecular_function	Interacting selectively and non-covalently with any phosphatase. [GOC:jl]	2	GO:0019903;GO:0019902	2	Q767M0;I3L7Q8	Q767M0(GO:0019902);I3L7Q8(GO:0019903)
GO:0019908	5	9	nuclear cyclin-dependent protein kinase holoenzyme complex	cellular_component	Cyclin-dependent protein kinase (CDK) complex found in the nucleus. [GOC:krc]	1	GO:0008024	1	C9E1C9	C9E1C9(GO:0008024;GO:0008024;GO:0008024)
GO:0006508	5	6	proteolysis	biological_process	The hydrolysis of proteins into smaller polypeptides and/or amino acids by cleavage of their peptide bonds. [GOC:bf, GOC:mah]	4	GO:0031293;GO:0006508;GO:0071712;GO:0016485	4	F1S8G9;F1RP50;F1SUE6;I3LPC6	F1S8G9(GO:0031293);F1RP50(GO:0071712);F1SUE6(GO:0006508;GO:0016485;GO:0016485);I3LPC6(GO:0016485)
GO:0051171	5	5	regulation of nitrogen compound metabolic process	biological_process	Any process that modulates the frequency, rate or extent of the chemical reactions and pathways involving nitrogen or nitrogenous compounds. [GOC:ai, GOC:tb]	19	GO:2001168;GO:0000079;GO:0045737;GO:0006282;GO:1900364;GO:0033129;GO:0043923;GO:0070816;GO:0006355;GO:0006357;GO:0045944;GO:0051438;GO:2000117;GO:0031056;GO:0010951;GO:0070940;GO:0001933;GO:0010466;GO:2000144	11	C9E1C9;Q0Z8R0;F1RP31;F1SG36;K7GKY0;F1RU26;F1SJG5;F1RWS7;F1S6I1;F6Q8T7;I3LM88	C9E1C9(GO:0006282;GO:0031056;GO:0033129;GO:0033129;GO:0045944;GO:0045944;GO:0070816;GO:1900364;GO:2001168;GO:2001168);Q0Z8R0(GO:0010466;GO:2000117);F1RP31(GO:0006355;GO:0006355;GO:0045944);F1SG36(GO:0006355);K7GKY0(GO:0001933;GO:0010951);F1RU26(GO:0006355;GO:0006357;GO:2000144);F1SJG5(GO:0006355);F1RWS7(GO:0043923;GO:0070940);F1S6I1(GO:0051438);F6Q8T7(GO:0000079;GO:0006355;GO:0006357;GO:0006357;G…
GO:0060429	5	5	epithelium development	biological_process	The process whose specific outcome is the progression of an epithelium over time, from its formation to the mature structure. An epithelium is a tissue that covers the internal or external surfaces of an anatomical structure. [GOC:dph, GOC:mtg_lung]	1	GO:0021915	1	I3LPC6	I3LPC6(GO:0021915)
GO:0000982	5	5	transcription factor activity, RNA polymerase II core promoter proximal region sequence-specific binding	molecular_function	Interacting selectively and non-covalently with a sequence of DNA that is in cis with and relatively close to a core promoter for RNA polymerase II (RNAP II) in order to modulate transcription by RNAP II. [GOC:txnOH]	1	GO:0001077	1	I3LM88	I3LM88(GO:0001077)
GO:0032101	5	5	regulation of response to external stimulus	biological_process	Any process that modulates the frequency, rate or extent of a response to an external stimulus. [GOC:mah]	1	GO:0061045	1	K7GKY0	K7GKY0(GO:0061045)
GO:0001817	5	5	regulation of cytokine production	biological_process	Any process that modulates the frequency, rate, or extent of production of a cytokine. [GOC:add, ISBN:0781735149]	1	GO:2000553	1	F1S9L2	F1S9L2(GO:2000553)
GO:0008424	5	8	glycoprotein 6-alpha-L-fucosyltransferase activity	molecular_function	Catalysis of the reaction: N(4)-{N-acetyl-beta-D-glucosaminyl-(1->2)-alpha-D-mannosyl-(1->3)-[N-acetyl-beta-D-glucosaminyl-(1->2)-alpha-D-mannosyl-(1->6)]-beta-D-mannosyl-(1->4)-N-acetyl-beta-D-glucosaminyl-(1->4)-N-acetyl-beta-D-glucosaminyl}-L-asparagine + GDP-L-fucose = N(4)-{N-acetyl-beta-D-glucosaminyl-(1->2)-alpha-D-mannosyl-(1->3)-[N-acetyl-beta-D-glucosaminyl-(1->2)-alpha-D-mannosyl-(1->6…	1	GO:0008424	1	F1SA54	F1SA54(GO:0008424;GO:0008424)
GO:0043603	5	5	cellular amide metabolic process	biological_process	The chemical reactions and pathways involving an amide, any derivative of an oxoacid in which an acidic hydroxy group has been replaced by an amino or substituted amino group, as carried out by individual cells. [CHEBI:32988]	1	GO:0006412	1	I3LTC4	I3LTC4(GO:0006412)
GO:0045296	5	5	cadherin binding	molecular_function	Interacting selectively and non-covalently with cadherin, a type I membrane protein involved in cell adhesion. [GOC:bf]	1	GO:0045296	1	F1SEA5	F1SEA5(GO:0045296)
GO:0120036	5	5	plasma membrane bounded cell projection organization	biological_process	A process that is carried out at the cellular level which results in the assembly, arrangement of constituent parts, or disassembly of a plasma membrane bounded prolongation or process extending from a cell, e.g. a cilium or axon. [GOC:krc]	2	GO:1905515;GO:0060271	2	F1RNN4;I3LPC6	F1RNN4(GO:0060271;GO:0060271;GO:0060271);I3LPC6(GO:0060271;GO:0060271;GO:0060271;GO:1905515)
GO:0005654	5	6	nucleoplasm	cellular_component	That part of the nuclear content other than the chromosomes or the nucleolus. [GOC:ma, ISBN:0124325653]	1	GO:0005654	6	C9E1C9;F1SRJ4;F1RU26;F1SNA6;F6Q8T7;I3LM88	C9E1C9(GO:0005654;GO:0005654);F1SRJ4(GO:0005654);F1RU26(GO:0005654);F1SNA6(GO:0005654);F6Q8T7(GO:0005654;GO:0005654);I3LM88(GO:0005654)
GO:0030278	5	5	regulation of ossification	biological_process	Any process that modulates the frequency, rate or extent of bone formation. [GOC:go_curators]	1	GO:0030500	1	I3LT15	I3LT15(GO:0030500)
GO:0002009	5	5	morphogenesis of an epithelium	biological_process	The process in which the anatomical structures of epithelia are generated and organized. An epithelium consists of closely packed cells arranged in one or more layers, that covers the outer surfaces of the body or lines any internal cavity or tube. [GOC:dph, GOC:jl, GOC:tb, ISBN:0198506732]	1	GO:0001947	1	I3LPC6	I3LPC6(GO:0001947)
GO:0098852	5	7	lytic vacuole membrane	cellular_component	The lipid bilayer surrounding a lytic vacuole and separating its contents from the cytoplasm of the cell. [GOC:dos]	1	GO:0005765	2	F1S8G9;I3LF05	F1S8G9(GO:0005765);I3LF05(GO:0005765)
GO:0071705	5	5	nitrogen compound transport	biological_process	The directed movement of nitrogen-containing compounds into, out of or within a cell, or between cells, by means of some agent such as a transporter or pore. [CHEBI:51143, GOC:mah]	6	GO:0016973;GO:0009306;GO:0042073;GO:0035735;GO:0015031;GO:0006406	4	F1SJ46;F1RNN4;F1SJQ4;F1SED4	F1SJ46(GO:0015031);F1RNN4(GO:0035735;GO:0042073;GO:0042073);F1SJQ4(GO:0006406;GO:0016973);F1SED4(GO:0009306)
GO:0071702	5	5	organic substance transport	biological_process	The directed movement of organic substances into, out of or within a cell, or between cells, or within a multicellular organism by means of some agent such as a transporter or pore. An organic substance is a molecular entity that contains carbon. [CHEBI:50860, GOC:mah]	6	GO:0016973;GO:0009306;GO:0042073;GO:0035735;GO:0015031;GO:0006406	4	F1SJ46;F1RNN4;F1SJQ4;F1SED4	F1SJ46(GO:0015031);F1RNN4(GO:0035735;GO:0042073;GO:0042073);F1SJQ4(GO:0006406;GO:0016973);F1SED4(GO:0009306)
GO:0005794	5	6	Golgi apparatus	cellular_component	A compound membranous cytoplasmic organelle of eukaryotic cells, consisting of flattened, ribosome-free vesicles arranged in a more or less regular stack. The Golgi apparatus differs from the endoplasmic reticulum in often having slightly thicker membranes, appearing in sections as a characteristic shallow semicircle so that the convex side (cis or entry face) abuts the endoplasmic reticulum, sec…	1	GO:0005794	1	F1SA54	F1SA54(GO:0005794)
GO:0010646	5	5	regulation of cell communication	biological_process	Any process that modulates the frequency, rate or extent of cell communication. Cell communication is the process that mediates interactions between a cell and its surroundings. Encompasses interactions such as signaling or attachment between one cell and another cell, between a cell and an extracellular matrix, or between a cell and any other aspect of its environment. [GOC:dph, GOC:tb]	7	GO:0008589;GO:0032008;GO:0034157;GO:0045747;GO:0045880;GO:0034165;GO:0030512	5	I3LT15;I3LF05;K7GKY0;I3LPC6;F1S9L2	I3LT15(GO:0045747);I3LF05(GO:0032008);K7GKY0(GO:0030512);I3LPC6(GO:0008589;GO:0045880);F1S9L2(GO:0034157;GO:0034165)
GO:0009953	5	5	dorsal/ventral pattern formation	biological_process	The regionalization process in which the areas along the dorsal/ventral axis are established that will lead to differences in cell differentiation. The dorsal/ventral axis is defined by a line that runs orthogonal to both the anterior/posterior and left/right axes. The dorsal end is defined by the upper or back side of an organism. The ventral end is defined by the lower or front side of an organ…	1	GO:0009953	1	I3LPC6	I3LPC6(GO:0009953)
GO:0034097	5	5	response to cytokine	biological_process	Any process that results in a change in state or activity of a cell or an organism (in terms of movement, secretion, enzyme production, gene expression, etc.) as a result of a cytokine stimulus. [GOC:sl]	3	GO:0071345;GO:0071357;GO:0035457	3	K7GKN2;C9E1C9;F1SCY2	K7GKN2(GO:0071357);C9E1C9(GO:0071345);F1SCY2(GO:0035457)
GO:0010941	5	5	regulation of cell death	biological_process	Any process that modulates the rate or frequency of cell death. Cell death is the specific activation or halting of processes within a cell so that its vital functions markedly cease, rather than simply deteriorating gradually over time, which culminates in cell death. [GOC:dph, GOC:tb]	3	GO:0043065;GO:0042981;GO:0043068	2	I3LDJ9;F1RUL8	I3LDJ9(GO:0043065;GO:0043068);F1RUL8(GO:0042981)
GO:0032555	5	7	purine ribonucleotide binding	molecular_function	Interacting selectively and non-covalently with a purine ribonucleotide, any compound consisting of a purine ribonucleoside that is esterified with (ortho)phosphate or an oligophosphate at any hydroxyl group on the ribose moiety. [GOC:mah]	2	GO:0005524;GO:0005525	8	C9E1C9;I3LT15;K7GKN2;G9BWQ2;F1RFL5;F1SJG5;I3LFY4;I3LM88	C9E1C9(GO:0005524;GO:0005524);I3LT15(GO:0005524);K7GKN2(GO:0005525;GO:0005525);G9BWQ2(GO:0005524;GO:0005524);F1RFL5(GO:0005524;GO:0005524);F1SJG5(GO:0005524);I3LFY4(GO:0005524);I3LM88(GO:0005524)
GO:0030957	5	5	Tat protein binding	molecular_function	Interacting selectively and non-covalently with Tat, a viral transactivating regulatory protein from the human immunodeficiency virus, or the equivalent protein from another virus. [GOC:mah, PMID:9094689]	1	GO:0030957	1	F1RWS7	F1RWS7(GO:0030957)
GO:0009855	5	5	determination of bilateral symmetry	biological_process	The establishment of an organism's body plan or part of an organism with respect to a single longitudinal plane. The pattern can either be symmetric, such that the halves are mirror images, or asymmetric where the pattern deviates from this symmetry. [GOC:go_curators]	1	GO:0007368	1	I3LPC6	I3LPC6(GO:0007368)
GO:0034654	5	6	nucleobase-containing compound biosynthetic process	biological_process	The chemical reactions and pathways resulting in the formation of nucleobases, nucleosides, nucleotides and nucleic acids. [GOC:mah]	7	GO:0006228;GO:0006241;GO:0061614;GO:0006351;GO:0006366;GO:0006368;GO:0006183	6	F1RPV8;C9E1C9;F1RP31;F1RU26;F6Q8T7;I3LM88	F1RPV8(GO:0006183;GO:0006228;GO:0006241);C9E1C9(GO:0006368);F1RP31(GO:0006351;GO:0006351);F1RU26(GO:0061614);F6Q8T7(GO:0006366);I3LM88(GO:0006366)
GO:0006974	5	5	cellular response to DNA damage stimulus	biological_process	Any process that results in a change in state or activity of a cell (in terms of movement, secretion, enzyme production, gene expression, etc.) as a result of a stimulus indicating damage to its DNA from environmental insults or errors during metabolism. [GOC:go_curators]	3	GO:0006974;GO:0006289;GO:0006281	2	F6Q8T7;F1SNA6	F6Q8T7(GO:0006281;GO:0006289);F1SNA6(GO:0006281;GO:0006281;GO:0006974;GO:0006974)
GO:0090287	5	5	regulation of cellular response to growth factor stimulus	biological_process	Any process that modulates the rate, frequency, or extent of a change in state or activity of a cell (in terms of movement, secretion, enzyme production, gene expression, etc.) as a result of a growth factor stimulus. [GOC:tb]	1	GO:0030512	1	K7GKY0	K7GKY0(GO:0030512)
GO:0050431	5	5	transforming growth factor beta binding	molecular_function	Interacting selectively and non-covalently with TGF-beta, transforming growth factor beta, a multifunctional peptide that controls proliferation, differentiation and other functions in many cell types. [ISBN:0198506732]	1	GO:0050431	1	K7GKY0	K7GKY0(GO:0050431)
GO:0030659	5	6	cytoplasmic vesicle membrane	cellular_component	The lipid bilayer surrounding a cytoplasmic vesicle. [GOC:mah]	1	GO:0030658	1	Q06A97	Q06A97(GO:0030658)
GO:0031526	5	6	brush border membrane	cellular_component	The portion of the plasma membrane surrounding the brush border. [GOC:mah]	1	GO:0031526	1	F1S5K2	F1S5K2(GO:0031526;GO:0031526)
GO:0035639	5	5	purine ribonucleoside triphosphate binding	molecular_function	Interacting selectively and non-covalently with a purine ribonucleoside triphosphate, a compound consisting of a purine base linked to a ribose sugar esterified with triphosphate on the sugar. [CHEBI:26398, GOC:BHF, GOC:ebc, ISBN:0198506732]	2	GO:0005524;GO:0005525	8	C9E1C9;I3LT15;K7GKN2;G9BWQ2;F1RFL5;F1SJG5;I3LFY4;I3LM88	C9E1C9(GO:0005524;GO:0005524);I3LT15(GO:0005524);K7GKN2(GO:0005525;GO:0005525);G9BWQ2(GO:0005524;GO:0005524);F1RFL5(GO:0005524;GO:0005524);F1SJG5(GO:0005524);I3LFY4(GO:0005524);I3LM88(GO:0005524)
GO:0005694	5	6	chromosome	cellular_component	A structure composed of a very long molecule of DNA and associated proteins (e.g. histones) that carries hereditary information. [ISBN:0198547684]	1	GO:0005694	1	C9E1C9	C9E1C9(GO:0005694)
GO:0051049	5	5	regulation of transport	biological_process	Any process that modulates the frequency, rate or extent of the directed movement of substances (such as macromolecules, small molecules, ions) into, out of or within a cell, or between cells, by means of some agent such as a transporter or pore. [GOC:ai]	5	GO:2000369;GO:1901253;GO:0003400;GO:0030100;GO:0050709	5	I3LT15;K7GKN2;F1RXZ6;F1SED4;F1S9L2	I3LT15(GO:2000369);K7GKN2(GO:1901253);F1RXZ6(GO:0030100);F1SED4(GO:0003400);F1S9L2(GO:0050709)
GO:0032880	5	5	regulation of protein localization	biological_process	Any process that modulates the frequency, rate or extent of any process in which a protein is transported to, or maintained in, a specific location. [GOC:dph, GOC:mah, GOC:tb]	1	GO:0050709	1	F1S9L2	F1S9L2(GO:0050709)
GO:0090304	5	6	nucleic acid metabolic process	biological_process	Any cellular metabolic process involving nucleic acids. [GOC:dph, GOC:tb]	14	GO:0016180;GO:0090502;GO:0006281;GO:0000154;GO:0030490;GO:0006289;GO:0006364;GO:0031167;GO:0006366;GO:0006368;GO:0010501;GO:0031297;GO:0061614;GO:0006351	11	C9E1C9;F1RP31;F1RFL5;F1SBX8;F1RFZ6;F1SNA6;F1STY6;F6Q8T7;I3LM88;F1RU26;F1RHJ0	C9E1C9(GO:0006368;GO:0031297);F1RP31(GO:0006351;GO:0006351);F1RFL5(GO:0010501);F1SBX8(GO:0090502);F1RFZ6(GO:0006364;GO:0006364;GO:0030490);F1SNA6(GO:0006281;GO:0006281);F1STY6(GO:0016180);F6Q8T7(GO:0006281;GO:0006289;GO:0006366);I3LM88(GO:0006366);F1RU26(GO:0061614);F1RHJ0(GO:0000154;GO:0031167)
GO:0051169	5	6	nuclear transport	biological_process	The directed movement of substances into, out of, or within the nucleus. [GOC:ai]	2	GO:0016973;GO:0006406	1	F1SJQ4	F1SJQ4(GO:0006406;GO:0016973)
GO:0017076	5	6	purine nucleotide binding	molecular_function	Interacting selectively and non-covalently with purine nucleotides, any compound consisting of a purine nucleoside esterified with (ortho)phosphate. [GOC:ai]	2	GO:0005524;GO:0005525	8	C9E1C9;I3LT15;K7GKN2;G9BWQ2;F1RFL5;F1SJG5;I3LFY4;I3LM88	C9E1C9(GO:0005524;GO:0005524);I3LT15(GO:0005524);K7GKN2(GO:0005525;GO:0005525);G9BWQ2(GO:0005524;GO:0005524);F1RFL5(GO:0005524;GO:0005524);F1SJG5(GO:0005524);I3LFY4(GO:0005524);I3LM88(GO:0005524)
GO:0036071	5	5	N-glycan fucosylation	biological_process	The process of transferring a fucosyl group to an N-glycan. An N-glycan is the carbohydrate portion of an N-glycoprotein when attached to a nitrogen from asparagine or arginine side-chains. [CHEBI:59520, GOC:sart, PMID:19948734]	1	GO:0036071	1	F1SA54	F1SA54(GO:0036071)
GO:0008649	5	7	rRNA methyltransferase activity	molecular_function	Catalysis of the transfer of a methyl group from S-adenosyl-L-methionine to a nucleoside residue in an rRNA molecule. [GOC:mah]	2	GO:0000179;GO:0008649	1	F1RHJ0	F1RHJ0(GO:0000179;GO:0008649)
GO:0035770	5	6	ribonucleoprotein granule	cellular_component	A non-membranous macromolecular complex containing proteins and translationally silenced mRNAs. RNA granules contain proteins that control the localization, stability, and translation of their RNA cargo. Different types of RNA granules (RGs) exist, depending on the cell type and cellular conditions. [GOC:go_curators, GOC:sp, PMID:16520386, PMID:20368989, PMID:21436445]	1	GO:0036464	2	C9E1C9;F1SJQ4	C9E1C9(GO:0036464;GO:0036464);F1SJQ4(GO:0036464)
GO:0051128	5	5	regulation of cellular component organization	biological_process	Any process that modulates the frequency, rate or extent of a process involved in the formation, arrangement of constituent parts, or disassembly of cell structures, including the plasma membrane and any external encapsulating structures such as the cell wall and cell envelope. [GOC:ai]	8	GO:2001168;GO:2000369;GO:0033129;GO:0008360;GO:2000144;GO:0031056;GO:0030100;GO:0003400	6	C9E1C9;I3LT15;F1RU26;F1RXZ6;I3LH80;F1SED4	C9E1C9(GO:0031056;GO:0033129;GO:0033129;GO:2001168;GO:2001168);I3LT15(GO:2000369);F1RU26(GO:2000144);F1RXZ6(GO:0030100);I3LH80(GO:0008360);F1SED4(GO:0003400)
GO:0019693	5	6	ribose phosphate metabolic process	biological_process	The chemical reactions and pathways involving ribose phosphate, any phosphorylated ribose sugar. [GOC:ai]	3	GO:0006228;GO:0006241;GO:0006183	1	F1RPV8	F1RPV8(GO:0006183;GO:0006228;GO:0006241)
GO:0005829	5	5	cytosol	cellular_component	The part of the cytoplasm that does not contain organelles but which does contain other particulate matter, such as protein complexes. [GOC:hjd, GOC:jl]	1	GO:0005829	5	F1RFL5;F1SLA2;K7GKN2;F6Q8T7;Q06A97	F1RFL5(GO:0005829;GO:0005829);F1SLA2(GO:0005829);K7GKN2(GO:0005829);F6Q8T7(GO:0005829;GO:0005829);Q06A97(GO:0005829)
GO:0080090	5	5	regulation of primary metabolic process	biological_process	Any process that modulates the frequency, rate or extent of the chemical reactions and pathways within a cell or an organism involving those compounds formed as a part of the normal anabolic and catabolic processes. These processes take place in most, if not all, cells of the organism. [PMID:19211694]	20	GO:2001168;GO:0000079;GO:0045737;GO:0006282;GO:0031998;GO:1900364;GO:0033129;GO:0043923;GO:0070816;GO:0006355;GO:0006357;GO:0045944;GO:0051438;GO:2000117;GO:0031056;GO:0010951;GO:0070940;GO:0001933;GO:0010466;GO:2000144	12	C9E1C9;Q0Z8R0;F1RP31;F1SG36;K7GKY0;F1RU26;F1SUE6;F1SJG5;F1RWS7;F1S6I1;F6Q8T7;I3LM88	C9E1C9(GO:0006282;GO:0031056;GO:0033129;GO:0033129;GO:0045944;GO:0045944;GO:0070816;GO:1900364;GO:2001168;GO:2001168);Q0Z8R0(GO:0010466;GO:2000117);F1RP31(GO:0006355;GO:0006355;GO:0045944);F1SG36(GO:0006355);K7GKY0(GO:0001933;GO:0010951);F1RU26(GO:0006355;GO:0006357;GO:2000144);F1SUE6(GO:0031998;GO:0031998);F1SJG5(GO:0006355);F1RWS7(GO:0043923;GO:0070940);F1S6I1(GO:0051438);F6Q8T7(GO:0000079;GO:0…
GO:0016773	5	5	phosphotransferase activity, alcohol group as acceptor	molecular_function	Catalysis of the transfer of a phosphorus-containing group from one compound (donor) to an alcohol group (acceptor). [GOC:jl]	4	GO:0004693;GO:0008353;GO:0004672;GO:0004674	4	I3LT15;F6Q8T7;C9E1C9;G9BWQ2	I3LT15(GO:0004672;GO:0004674);F6Q8T7(GO:0008353);C9E1C9(GO:0004672;GO:0004674;GO:0004693;GO:0004693;GO:0008353;GO:0008353;GO:0008353);G9BWQ2(GO:0004672;GO:0004674;GO:0004674;GO:0004674)
GO:0016776	5	5	phosphotransferase activity, phosphate group as acceptor	molecular_function	Catalysis of the transfer of a phosphorus-containing group from one compound (donor) to a phosphate group (acceptor). [GOC:jl]	1	GO:0004550	1	F1RPV8	F1RPV8(GO:0004550)
GO:0009225	5	6	nucleotide-sugar metabolic process	biological_process	The cellular chemical reactions and pathways involving nucleotide-sugars, any nucleotide-carbohydrate in which the distal phosphoric residue of a nucleoside 5'-diphosphate is in glycosidic linkage with a monosaccharide or monosaccharide derivative. [ISBN:0198506732]	1	GO:0097359	1	F1RP50	F1RP50(GO:0097359)
GO:0009966	5	6	regulation of signal transduction	biological_process	Any process that modulates the frequency, rate or extent of signal transduction. [GOC:sm]	7	GO:0008589;GO:0032008;GO:0034157;GO:0045747;GO:0045880;GO:0034165;GO:0030512	5	I3LT15;I3LF05;K7GKY0;I3LPC6;F1S9L2	I3LT15(GO:0045747);I3LF05(GO:0032008);K7GKY0(GO:0030512);I3LPC6(GO:0008589;GO:0045880);F1S9L2(GO:0034157;GO:0034165)
GO:0000139	5	6	Golgi membrane	cellular_component	The lipid bilayer surrounding any of the compartments of the Golgi apparatus. [GOC:mah]	1	GO:0032580	1	F1SA54	F1SA54(GO:0032580;GO:0032580)
GO:0051094	5	5	positive regulation of developmental process	biological_process	Any process that activates or increases the rate or extent of development, the biological process whose specific outcome is the progression of an organism over time from an initial condition (e.g. a zygote, or a young adult) to a later condition (e.g. a multicellular animal or an aged adult). [GOC:ai]	1	GO:1904179	1	G9BWQ2	G9BWQ2(GO:1904179)
GO:0051099	5	5	positive regulation of binding	biological_process	Any process that activates or increases the rate or extent of binding, the selective interaction of a molecule with one or more specific sites on another molecule. [GOC:ai]	1	GO:1903839	1	C9E1C9	C9E1C9(GO:1903839)
GO:0030229	5	6	very-low-density lipoprotein particle receptor activity	molecular_function	Combining with a very-low-density lipoprotein particle and delivering the very-low-density lipoprotein into the cell via endocytosis. [GOC:bf, ISBN:0198506732]	1	GO:0030229	1	E7CXS1	E7CXS1(GO:0030229)
GO:0070011	5	5	peptidase activity, acting on L-amino acid peptides	molecular_function	Catalysis of the hydrolysis of peptide bonds formed between L-amino acids. [GOC:mah]	3	GO:0004252;GO:0004190;GO:0042500	2	F1S8G9;F1SUE6	F1S8G9(GO:0004190;GO:0042500);F1SUE6(GO:0004252;GO:0004252)
GO:0044782	5	6	cilium organization	biological_process	A process that is carried out at the cellular level which results in the assembly, arrangement of constituent parts, or disassembly of a cilium, a specialized eukaryotic organelle that consists of a filiform extrusion of the cell surface. Each cilium is bounded by an extrusion of the cytoplasmic membrane, and contains a regular longitudinal array of microtubules, anchored basally in a centriole. …	2	GO:1905515;GO:0060271	2	F1RNN4;I3LPC6	F1RNN4(GO:0060271;GO:0060271;GO:0060271);I3LPC6(GO:0060271;GO:0060271;GO:0060271;GO:1905515)
GO:0009889	5	5	regulation of biosynthetic process	biological_process	Any process that modulates the frequency, rate or extent of the chemical reactions and pathways resulting in the formation of substances. [GOC:go_curators]	7	GO:0070940;GO:0070816;GO:0006355;GO:0006357;GO:0045944;GO:2000144;GO:0043923	8	C9E1C9;F1RP31;F1SG36;F1RU26;F1SJG5;F1RWS7;F6Q8T7;I3LM88	C9E1C9(GO:0045944;GO:0045944;GO:0070816);F1RP31(GO:0006355;GO:0006355;GO:0045944);F1SG36(GO:0006355);F1RU26(GO:0006355;GO:0006357;GO:2000144);F1SJG5(GO:0006355);F1RWS7(GO:0043923;GO:0070940);F6Q8T7(GO:0006355;GO:0006357;GO:0006357;GO:0045944);I3LM88(GO:0006357;GO:0045944)
GO:0048232	5	5	male gamete generation	biological_process	Generation of the male gamete; specialised haploid cells produced by meiosis and along with a female gamete takes part in sexual reproduction. [GOC:dph, GOC:jid]	1	GO:0007283	1	F1RNN4	F1RNN4(GO:0007283)
GO:0030414	5	5	peptidase inhibitor activity	molecular_function	Stops, prevents or reduces the activity of a peptidase, any enzyme that catalyzes the hydrolysis peptide bonds. [GOC:jl]	3	GO:0004869;GO:0030414;GO:0004866	2	K7GKY0;Q0Z8R0	K7GKY0(GO:0004866);Q0Z8R0(GO:0004869;GO:0004869;GO:0004869;GO:0030414)
GO:0005762	5	8	mitochondrial large ribosomal subunit	cellular_component	The larger of the two subunits of a mitochondrial ribosome. Two sites on the ribosomal large subunit are involved in translation: the aminoacyl site (A site) and peptidyl site (P site). [GOC:mcc]	1	GO:0005762	1	I3LTC4	I3LTC4(GO:0005762)
GO:0001510	5	9	RNA methylation	biological_process	Posttranscriptional addition of a methyl group to either a nucleotide or 2'-O ribose in a polyribonucleotide. Usually uses S-adenosylmethionine as a cofactor. [GOC:hjd]	1	GO:0031167	1	F1RHJ0	F1RHJ0(GO:0031167)
GO:0023056	5	5	positive regulation of signaling	biological_process	Any process that activates, maintains or increases the frequency, rate or extent of a signaling process. [GOC:mtg_signal]	5	GO:0045747;GO:0032008;GO:0034157;GO:0045880;GO:0034165	4	I3LT15;I3LF05;I3LPC6;F1S9L2	I3LT15(GO:0045747);I3LF05(GO:0032008);I3LPC6(GO:0045880);F1S9L2(GO:0034157;GO:0034165)
GO:0023057	5	5	negative regulation of signaling	biological_process	Any process that stops, prevents, or reduces the frequency, rate or extent of a signaling process. [GOC:mtg_signal]	1	GO:0030512	1	K7GKY0	K7GKY0(GO:0030512)
GO:0004842	5	5	ubiquitin-protein transferase activity	molecular_function	Catalysis of the transfer of ubiquitin from one protein to another via the reaction X-Ub + Y --> Y-Ub + X, where both X-Ub and Y-Ub are covalent linkages. [GOC:BioGRID, GOC:jh2, PMID:9635407]	1	GO:0004842	1	F1S6I1	F1S6I1(GO:0004842)
GO:0050658	5	8	RNA transport	biological_process	The directed movement of RNA, ribonucleic acids, into, out of or within a cell, or between cells, by means of some agent such as a transporter or pore. [GOC:ai]	2	GO:0016973;GO:0006406	1	F1SJQ4	F1SJQ4(GO:0006406;GO:0016973)
GO:0060606	5	5	tube closure	biological_process	Creation of the central hole of a tube in an anatomical structure by sealing the edges of an epithelial fold. [GOC:dph]	1	GO:0001843	1	I3LPC6	I3LPC6(GO:0001843)
GO:0009116	5	7	nucleoside metabolic process	biological_process	The chemical reactions and pathways involving a nucleoside, a nucleobase linked to either beta-D-ribofuranose (a ribonucleoside) or 2-deoxy-beta-D-ribofuranose, (a deoxyribonucleoside), e.g. adenosine, guanosine, inosine, cytidine, uridine and deoxyadenosine, deoxyguanosine, deoxycytidine and thymidine (= deoxythymidine). [GOC:ma]	3	GO:0006228;GO:0006241;GO:0006183	1	F1RPV8	F1RPV8(GO:0006183;GO:0006228;GO:0006241)
GO:0034728	5	6	nucleosome organization	biological_process	A process that is carried out at the cellular level which results in the assembly, arrangement of constituent parts, or disassembly of one or more nucleosomes. [GOC:mah]	2	GO:0006334;GO:0006335	1	F1S7L7	F1S7L7(GO:0006334;GO:0006335)
GO:0018130	5	5	heterocycle biosynthetic process	biological_process	The chemical reactions and pathways resulting in the formation of heterocyclic compounds, those with a cyclic molecular structure and at least two different atoms in the ring (or rings). [ISBN:0198547684]	7	GO:0006228;GO:0006241;GO:0061614;GO:0006351;GO:0006366;GO:0006368;GO:0006183	6	F1RPV8;C9E1C9;F1RP31;F1RU26;F6Q8T7;I3LM88	F1RPV8(GO:0006183;GO:0006228;GO:0006241);C9E1C9(GO:0006368);F1RP31(GO:0006351;GO:0006351);F1RU26(GO:0061614);F6Q8T7(GO:0006366);I3LM88(GO:0006366)
GO:0002697	5	5	regulation of immune effector process	biological_process	Any process that modulates the frequency, rate, or extent of an immune effector process. [GOC:add]	1	GO:2000553	1	F1S9L2	F1S9L2(GO:2000553)
GO:0003143	5	7	embryonic heart tube morphogenesis	biological_process	The process in which the anatomical structures of the embryonic heart tube are generated and organized. The embryonic heart tube is an epithelial tube that will give rise to the mature heart. [GOC:mtg_heart]	1	GO:0001947	1	I3LPC6	I3LPC6(GO:0001947)
GO:0043254	5	6	regulation of protein complex assembly	biological_process	Any process that modulates the frequency, rate or extent of protein complex assembly. [GOC:jl]	2	GO:0003400;GO:2000144	2	F1RU26;F1SED4	F1RU26(GO:2000144);F1SED4(GO:0003400)
GO:0002521	5	5	leukocyte differentiation	biological_process	The process in which a relatively unspecialized hemopoietic precursor cell acquires the specialized features of a leukocyte. A leukocyte is an achromatic cell of the myeloid or lymphoid lineages capable of ameboid movement, found in blood or other tissue. [CL:0000738, GOC:add, PMID:16551264]	1	GO:0043367	1	F1S9L2	F1S9L2(GO:0043367)
GO:0010038	5	5	response to metal ion	biological_process	Any process that results in a change in state or activity of a cell or an organism (in terms of movement, secretion, enzyme production, gene expression, etc.) as a result of a metal ion stimulus. [GOC:sm]	2	GO:0051592;GO:0071294	2	P79379;F6Q8T7	P79379(GO:0071294);F6Q8T7(GO:0051592)
GO:0005819	5	6	spindle	cellular_component	The array of microtubules and associated molecules that forms between opposite poles of a eukaryotic cell during mitosis or meiosis and serves to move the duplicated chromosomes apart. [ISBN:0198547684]	1	GO:0005819	1	F1RWS7	F1RWS7(GO:0005819)
GO:0005811	5	6	lipid droplet	cellular_component	An intracellular non-membrane-bounded organelle comprising a matrix of coalesced lipids surrounded by a phospholipid monolayer. May include associated proteins. [GOC:mah, GOC:tb]	1	GO:0005811	1	F1S9L2	F1S9L2(GO:0005811;GO:0005811)
GO:0005815	5	6	microtubule organizing center	cellular_component	An intracellular structure that can catalyze gamma-tubulin-dependent microtubule nucleation and that can anchor microtubules by interacting with their minus ends, plus ends or sides. [GOC:vw, http://en.wikipedia.org/wiki/Microtubule_organizing_center, ISBN:0815316194, PMID:17072892, PMID:17245416]	2	GO:0036064;GO:0005813	3	F1RWS7;F1RNN4;I3LPC6	F1RWS7(GO:0005813);F1RNN4(GO:0005813;GO:0005813;GO:0036064);I3LPC6(GO:0036064)
GO:0001067	5	5	regulatory region nucleic acid binding	molecular_function	Interacting selectively and non-covalently with a nucleic acid region that regulates a nucleic acid-based process. Such processes include transcription, DNA replication, and DNA repair. [GOC:txnOH]	5	GO:0000978;GO:0044212;GO:0001164;GO:0000979;GO:0000977	5	F1SLA2;F1RU26;F1RP31;C9E1C9;I3LM88	F1SLA2(GO:0001164);F1RU26(GO:0000977;GO:0000978);F1RP31(GO:0000977);C9E1C9(GO:0000979;GO:0044212;GO:0044212);I3LM88(GO:0000978)
GO:0006753	5	7	nucleoside phosphate metabolic process	biological_process	The chemical reactions and pathways involving any phosphorylated nucleoside. [GOC:mah]	4	GO:0006228;GO:0006241;GO:0006183;GO:0006165	1	F1RPV8	F1RPV8(GO:0006165;GO:0006183;GO:0006228;GO:0006241)
GO:0004518	5	5	nuclease activity	molecular_function	Catalysis of the hydrolysis of ester linkages within nucleic acids. [ISBN:0198547684]	1	GO:0033897	1	F1SBX8	F1SBX8(GO:0033897)
GO:0072527	5	5	pyrimidine-containing compound metabolic process	biological_process	The chemical reactions and pathways involving a pyrimidine-containing compound, i.e. any compound that contains pyrimidine or a formal derivative thereof. [CHEBI:39447, GOC:mah]	2	GO:0006228;GO:0006241	1	F1RPV8	F1RPV8(GO:0006228;GO:0006241)
GO:0098657	5	5	import into cell	biological_process	The directed movement of some substance from outside of a cell into the cytoplasmic compartment. This may occur via transport across the plasma membrane or via endocytosis. [GOC:dos]	1	GO:0006898	1	E7CXS1	E7CXS1(GO:0006898)
GO:0051539	5	5	4 iron, 4 sulfur cluster binding	molecular_function	Interacting selectively and non-covalently with a 4 iron, 4 sulfur (4Fe-4S) cluster; this cluster consists of four iron atoms, with the inorganic sulfur atoms found between the irons and acting as bridging ligands. [GOC:ai, PMID:15952888, Wikipedia:Iron-sulfur_cluster]	1	GO:0051539	1	F1S9L2	F1S9L2(GO:0051539)
GO:0015631	5	5	tubulin binding	molecular_function	Interacting selectively and non-covalently with monomeric or multimeric forms of tubulin, including microtubules. [GOC:clt]	2	GO:0015631;GO:0008017	2	K7GKN2;F1RNN4	K7GKN2(GO:0008017);F1RNN4(GO:0015631;GO:0015631;GO:0015631)
GO:0051604	5	6	protein maturation	biological_process	Any process leading to the attainment of the full functional capacity of a protein. [GOC:ai]	1	GO:0016485	2	F1SUE6;I3LPC6	F1SUE6(GO:0016485;GO:0016485);I3LPC6(GO:0016485)
GO:0060562	5	6	epithelial tube morphogenesis	biological_process	The process in which the anatomical structures of a tube are generated and organized from an epithelium. Epithelial tubes transport gases, liquids and cells from one site to another and form the basic structure of many organs and tissues, with tube shape and organization varying from the single-celled excretory organ in Caenorhabditis elegans to the branching trees of the mammalian kidney and ins…	1	GO:0001947	1	I3LPC6	I3LPC6(GO:0001947)
GO:0030098	5	6	lymphocyte differentiation	biological_process	The process in which a relatively unspecialized precursor cell acquires specialized features of a lymphocyte. A lymphocyte is a leukocyte commonly found in the blood and lymph that has the characteristics of a large nucleus, a neutral staining cytoplasm, and prominent heterochromatin. [CL:0000542, GOC:go_curators]	1	GO:0043367	1	F1S9L2	F1S9L2(GO:0043367)
GO:0031323	5	5	regulation of cellular metabolic process	biological_process	Any process that modulates the frequency, rate or extent of the chemical reactions and pathways by which individual cells transform chemical substances. [GOC:mah]	21	GO:2001168;GO:0000079;GO:0045737;GO:0006282;GO:0031998;GO:1900364;GO:0033129;GO:0043923;GO:0070816;GO:0006355;GO:0006357;GO:0045944;GO:0051438;GO:2000117;GO:0031056;GO:0010951;GO:0070940;GO:0001933;GO:0010506;GO:0010466;GO:2000144	13	C9E1C9;Q0Z8R0;F1RP31;F1SG36;K7GKY0;F1RU26;F1SUE6;F1SJG5;F1RWS7;F1S6I1;I3LF05;F6Q8T7;I3LM88	C9E1C9(GO:0006282;GO:0031056;GO:0033129;GO:0033129;GO:0045944;GO:0045944;GO:0070816;GO:1900364;GO:2001168;GO:2001168);Q0Z8R0(GO:0010466;GO:2000117);F1RP31(GO:0006355;GO:0006355;GO:0045944);F1SG36(GO:0006355);K7GKY0(GO:0001933;GO:0010951);F1RU26(GO:0006355;GO:0006357;GO:2000144);F1SUE6(GO:0031998;GO:0031998);F1SJG5(GO:0006355);F1RWS7(GO:0043923;GO:0070940);F1S6I1(GO:0051438);I3LF05(GO:0010506);F6Q…
GO:0072175	5	5	epithelial tube formation	biological_process	The developmental process pertaining to the initial formation of an epithelial tube. [GOC:mtg_kidney_jan10]	1	GO:0001841	1	I3LPC6	I3LPC6(GO:0001841)
GO:0051020	5	5	GTPase binding	molecular_function	Interacting selectively and non-covalently with a GTPase, any enzyme that catalyzes the hydrolysis of GTP. [GOC:ai]	3	GO:0005090;GO:0051020;GO:0017048	2	I3LH80;F1SED4	I3LH80(GO:0017048);F1SED4(GO:0005090;GO:0051020)
GO:0031122	5	7	cytoplasmic microtubule organization	biological_process	A process that is carried out at the cellular level which results in the assembly, arrangement of constituent parts, or disassembly of structures formed of microtubules and associated proteins in the cytoplasm of a cell. [GOC:mah]	1	GO:0031122	1	I3LPC6	I3LPC6(GO:0031122)
GO:0051817	5	5	modification of morphology or physiology of other organism involved in symbiotic interaction	biological_process	The process in which an organism effects a change in the structure or processes of a second organism, where the two organisms are in a symbiotic interaction. [GOC:cc]	1	GO:0043923	1	F1RWS7	F1RWS7(GO:0043923)
GO:0043902	5	5	positive regulation of multi-organism process	biological_process	Any process that activates or increases the frequency, rate or extent of a multi-organism process, a process in which an organism has an effect on another organism of the same or different species. [GOC:jl]	1	GO:0043923	1	F1RWS7	F1RWS7(GO:0043923)
GO:0043903	5	5	regulation of symbiosis, encompassing mutualism through parasitism	biological_process	Any process that modulates the frequency, rate or extent of symbiosis, an interaction between two organisms living together in more or less intimate association. [GOC:jl]	3	GO:1901253;GO:0045071;GO:0043923	3	K7GKN2;F1RWS7;F1S9L2	K7GKN2(GO:0045071;GO:0045071;GO:1901253);F1RWS7(GO:0043923);F1S9L2(GO:0045071;GO:0045071)
GO:0043901	5	5	negative regulation of multi-organism process	biological_process	Any process that stops, prevents, or reduces the frequency, rate or extent of a multi-organism process, a process in which an organism has an effect on another organism of the same or different species. [GOC:jl]	2	GO:1901253;GO:0045071	2	K7GKN2;F1S9L2	K7GKN2(GO:0045071;GO:0045071;GO:1901253);F1S9L2(GO:0045071;GO:0045071)
GO:0071310	5	5	cellular response to organic substance	biological_process	Any process that results in a change in state or activity of a cell (in terms of movement, secretion, enzyme production, gene expression, etc.) as a result of an organic substance stimulus. [GOC:mah]	3	GO:0071345;GO:0071357;GO:0035457	3	K7GKN2;C9E1C9;F1SCY2	K7GKN2(GO:0071357);C9E1C9(GO:0071345);F1SCY2(GO:0035457)
GO:0006801	5	5	superoxide metabolic process	biological_process	The chemical reactions and pathways involving superoxide, the superoxide anion O2- (superoxide free radical), or any compound containing this species. [CHEBI:18421, GOC:jl]	2	GO:0019430;GO:0006801	1	I3LUD1	I3LUD1(GO:0006801;GO:0019430)
GO:0032439	6	6	endosome localization	biological_process	Any process in which endosomes are transported to, and/or maintained in, a specific location within the cell. [GOC:ecd]	1	GO:0032439	1	K7GKN2	K7GKN2(GO:0032439)
GO:0006913	6	7	nucleocytoplasmic transport	biological_process	The directed movement of molecules between the nucleus and the cytoplasm. [GOC:go_curators]	2	GO:0016973;GO:0006406	1	F1SJQ4	F1SJQ4(GO:0006406;GO:0016973)
GO:0021522	6	7	spinal cord motor neuron differentiation	biological_process	The process in which neuroepithelial cells in the ventral neural tube acquire specialized structural and/or functional features of motor neurons. Motor neurons innervate an effector (muscle or glandular) tissue and are responsible for transmission of motor impulses from the brain to the periphery. Differentiation includes the processes involved in commitment of a cell to a specific fate. [GO_REF:…	1	GO:0021522	1	I3LPC6	I3LPC6(GO:0021522)
GO:0035794	6	8	positive regulation of mitochondrial membrane permeability	biological_process	Any process that increases the frequency, rate or extent of the passage or uptake of molecules by the mitochondrial membrane. [GOC:bf, PMID:12546810]	1	GO:0097345	1	I3LDJ9	I3LDJ9(GO:0097345)
GO:0051147	6	6	regulation of muscle cell differentiation	biological_process	Any process that modulates the frequency, rate or extent of muscle cell differentiation. [CL:0000187, GOC:ai]	1	GO:0051147	1	C9E1C9	C9E1C9(GO:0051147)
GO:0007263	6	8	nitric oxide mediated signal transduction	biological_process	Any intracellular signal transduction in which the signal is passed on within the cell via nitric oxide (NO). Includes synthesis of nitric oxide, receptors/sensors for nitric oxide (such as soluble guanylyl cyclase/sGC) and downstream effectors that further transmit the signal within the cell. Nitric oxide transmits its downstream effects through either cyclic GMP (cGMP)-dependent or independent …	1	GO:0007263	1	P79379	P79379(GO:0007263)
GO:0008589	6	7	regulation of smoothened signaling pathway	biological_process	Any process that modulates the frequency, rate or extent of smoothened signaling. [GOC:go_curators]	2	GO:0008589;GO:0045880	1	I3LPC6	I3LPC6(GO:0008589;GO:0045880)
GO:0016791	6	6	phosphatase activity	molecular_function	Catalysis of the hydrolysis of phosphoric monoesters, releasing inorganic phosphate. [EC:3.1.3, EC:3.1.3.41, GOC:curators, GOC:pg]	1	GO:0008420	1	F1RWS7	F1RWS7(GO:0008420;GO:0008420)
GO:0010564	6	6	regulation of cell cycle process	biological_process	Any process that modulates a cellular process that is involved in the progression of biochemical and morphological phases and events that occur in a cell during successive cell replication or nuclear replication events. [GOC:dph, GOC:tb]	1	GO:0071157	1	C9E1C9	C9E1C9(GO:0071157)
GO:0010565	6	6	regulation of cellular ketone metabolic process	biological_process	Any process that modulates the chemical reactions and pathways involving any of a class of organic compounds that contain the carbonyl group, CO, and in which the carbonyl group is bonded only to carbon atoms. The general formula for a ketone is RCOR, where R and R are alkyl or aryl groups. [GOC:dph, GOC:tb]	1	GO:0031998	1	F1SUE6	F1SUE6(GO:0031998;GO:0031998)
GO:0022604	6	6	regulation of cell morphogenesis	biological_process	Any process that modulates the frequency, rate or extent of cell morphogenesis. Cell morphogenesis is the developmental process in which the shape of a cell is generated and organized. [GOC:isa_complete]	1	GO:0008360	1	I3LH80	I3LH80(GO:0008360)
GO:0032774	6	8	RNA biosynthetic process	biological_process	The chemical reactions and pathways resulting in the formation of RNA, ribonucleic acid, one of the two main type of nucleic acid, consisting of a long, unbranched macromolecule formed from ribonucleotides joined in 3',5'-phosphodiester linkage. Includes polymerization of ribonucleotide monomers. Refers not only to transcription but also to e.g. viral RNA replication. [GOC:mah, GOC:txnOH]	4	GO:0006368;GO:0006351;GO:0061614;GO:0006366	5	F1RU26;I3LM88;C9E1C9;F6Q8T7;F1RP31	F1RU26(GO:0061614);I3LM88(GO:0006366);C9E1C9(GO:0006368);F6Q8T7(GO:0006366);F1RP31(GO:0006351;GO:0006351)
GO:0034340	6	6	response to type I interferon	biological_process	Any process that results in a change in state or activity of a cell or an organism (in terms of movement, secretion, enzyme production, gene expression, etc.) as a result of a type I interferon stimulus. Type I interferons include the interferon-alpha, beta, delta, episilon, zeta, kappa, tau, and omega gene families. [GOC:add, ISBN:0126896631, PMID:15546383, PMID:16681834]	1	GO:0071357	1	K7GKN2	K7GKN2(GO:0071357)
GO:0042886	6	6	amide transport	biological_process	The directed movement of an amide, any compound containing one, two, or three acyl groups attached to a nitrogen atom, into, out of or within a cell, or between cells, by means of some agent such as a transporter or pore. [GOC:jl, ISBN:0198506732]	4	GO:0009306;GO:0015031;GO:0035735;GO:0042073	3	F1SJ46;F1RNN4;F1SED4	F1SJ46(GO:0015031);F1RNN4(GO:0035735;GO:0042073;GO:0042073);F1SED4(GO:0009306)
GO:0019205	6	6	nucleobase-containing compound kinase activity	molecular_function	Catalysis of the transfer of a phosphate group, usually from ATP or GTP, to a nucleobase, nucleoside, nucleotide or polynucleotide substrate. [GOC:jl]	1	GO:0004550	1	F1RPV8	F1RPV8(GO:0004550)
GO:0007156	6	6	homophilic cell adhesion via plasma membrane adhesion molecules	biological_process	The attachment of a plasma membrane adhesion molecule in one cell to an identical molecule in an adjacent cell. [ISBN:0198506732]	1	GO:0007156	1	F1SP42	F1SP42(GO:0007156)
GO:0031625	6	6	ubiquitin protein ligase binding	molecular_function	Interacting selectively and non-covalently with a ubiquitin protein ligase enzyme, any of the E3 proteins. [GOC:vp]	1	GO:0031625	1	I3LM88	I3LM88(GO:0031625)
GO:0043565	6	6	sequence-specific DNA binding	molecular_function	Interacting selectively and non-covalently with DNA of a specific nucleotide composition, e.g. GC-rich DNA binding, or with a specific sequence motif or type of DNA e.g. promotor binding or rDNA binding. [GOC:jl]	5	GO:0000978;GO:0043565;GO:0001164;GO:0000979;GO:0000977	6	F1SLA2;C9E1C9;F1RP31;F1SG36;F1RU26;I3LM88	F1SLA2(GO:0001164);C9E1C9(GO:0000979);F1RP31(GO:0000977);F1SG36(GO:0043565);F1RU26(GO:0000977;GO:0000978);I3LM88(GO:0000978)
GO:1902531	6	7	regulation of intracellular signal transduction	biological_process	Any process that modulates the frequency, rate or extent of intracellular signal transduction. [GOC:dph, GOC:signaling, GOC:tb, GOC:TermGenie]	1	GO:0032008	1	I3LF05	I3LF05(GO:0032008)
GO:1904177	6	6	regulation of adipose tissue development	biological_process	Any process that modulates the frequency, rate or extent of adipose tissue development. [GO_REF:0000058, GOC:TermGenie, PMID:23081848]	1	GO:1904179	1	G9BWQ2	G9BWQ2(GO:1904179)
GO:1904179	6	7	positive regulation of adipose tissue development	biological_process	Any process that activates or increases the frequency, rate or extent of adipose tissue development. [GO_REF:0000058, GOC:TermGenie, PMID:23081848]	1	GO:1904179	1	G9BWQ2	G9BWQ2(GO:1904179)
GO:0036503	6	9	ERAD pathway	biological_process	The protein catabolic pathway which targets endoplasmic reticulum (ER)-resident proteins for degradation by the cytoplasmic proteasome. It begins with recognition of the ER-resident protein, includes retrotranslocation (dislocation) of the protein from the ER to the cytosol, protein modifications necessary for correct substrate transfer (e.g. ubiquitination), transport of the protein to the prote…	1	GO:0071712	1	F1RP50	F1RP50(GO:0071712)
GO:0065004	6	7	protein-DNA complex assembly	biological_process	The aggregation, arrangement and bonding together of proteins and DNA molecules to form a protein-DNA complex. [GOC:jl]	2	GO:0006334;GO:0006335	1	F1S7L7	F1S7L7(GO:0006334;GO:0006335)
GO:0051246	6	6	regulation of protein metabolic process	biological_process	Any process that modulates the frequency, rate or extent of the chemical reactions and pathways involving a protein. [GOC:ai]	10	GO:2001168;GO:2000117;GO:0033129;GO:0010466;GO:0045737;GO:0051438;GO:0031056;GO:0010951;GO:0001933;GO:0000079	5	F1S6I1;F6Q8T7;C9E1C9;Q0Z8R0;K7GKY0	F1S6I1(GO:0051438);F6Q8T7(GO:0000079;GO:0045737);C9E1C9(GO:0031056;GO:0033129;GO:0033129;GO:2001168;GO:2001168);Q0Z8R0(GO:0010466;GO:2000117);K7GKY0(GO:0001933;GO:0010951)
GO:0008637	6	6	apoptotic mitochondrial changes	biological_process	The morphological and physiological alterations undergone by mitochondria during apoptosis. [GOC:mah, GOC:mtg_apoptosis]	1	GO:0097345	1	I3LDJ9	I3LDJ9(GO:0097345)
GO:0045604	6	7	regulation of epidermal cell differentiation	biological_process	Any process that modulates the frequency, rate or extent of epidermal cell differentiation. [GOC:go_curators]	1	GO:0045616	1	K7GKY0	K7GKY0(GO:0045616)
GO:0004866	6	6	endopeptidase inhibitor activity	molecular_function	Stops, prevents or reduces the activity of an endopeptidase, any enzyme that hydrolyzes nonterminal peptide bonds in polypeptides. [GOC:jl]	2	GO:0004869;GO:0004866	2	K7GKY0;Q0Z8R0	K7GKY0(GO:0004866);Q0Z8R0(GO:0004869;GO:0004869;GO:0004869)
GO:0050678	6	6	regulation of epithelial cell proliferation	biological_process	Any process that modulates the frequency, rate or extent of epithelial cell proliferation. [GOC:ai]	2	GO:0050680;GO:0010839	2	K7GKY0;I3LPC6	K7GKY0(GO:0010839);I3LPC6(GO:0050680)
GO:0071345	6	6	cellular response to cytokine stimulus	biological_process	Any process that results in a change in state or activity of a cell (in terms of movement, secretion, enzyme production, gene expression, etc.) as a result of a cytokine stimulus. [GOC:mah]	3	GO:0071345;GO:0071357;GO:0035457	3	K7GKN2;C9E1C9;F1SCY2	K7GKN2(GO:0071357);C9E1C9(GO:0071345);F1SCY2(GO:0035457)
GO:0048525	6	7	negative regulation of viral process	biological_process	Any process that stops, prevents, or reduces the frequency, rate or extent of a multi-organism process in which a virus is a participant. [GOC:bf, GOC:jl]	2	GO:1901253;GO:0045071	2	K7GKN2;F1S9L2	K7GKN2(GO:0045071;GO:0045071;GO:1901253);F1S9L2(GO:0045071;GO:0045071)
GO:0048524	6	7	positive regulation of viral process	biological_process	Any process that activates or increases the frequency, rate or extent of a multi-organism process in which a virus is a participant. [GOC:bf, GOC:jl]	1	GO:0043923	1	F1RWS7	F1RWS7(GO:0043923)
GO:0006405	6	9	RNA export from nucleus	biological_process	The directed movement of RNA from the nucleus to the cytoplasm. [GOC:ma]	2	GO:0016973;GO:0006406	1	F1SJQ4	F1SJQ4(GO:0006406;GO:0016973)
GO:0017069	6	6	snRNA binding	molecular_function	Interacting selectively and non-covalently with a small nuclear RNA (snRNA). [GOC:mah]	2	GO:0017069;GO:0097322	1	C9E1C9	C9E1C9(GO:0017069;GO:0097322)
GO:1903034	6	6	regulation of response to wounding	biological_process	Any process that modulates the frequency, rate or extent of response to wounding. [GO_REF:0000058, GOC:kmv, GOC:TermGenie, pmid:19164535]	1	GO:0061045	1	K7GKY0	K7GKY0(GO:0061045)
GO:0030500	6	7	regulation of bone mineralization	biological_process	Any process that modulates the frequency, rate or extent of bone mineralization. [GOC:go_curators]	1	GO:0030500	1	I3LT15	I3LT15(GO:0030500)
GO:0051130	6	6	positive regulation of cellular component organization	biological_process	Any process that activates or increases the frequency, rate or extent of a process involved in the formation, arrangement of constituent parts, or disassembly of cell structures, including the plasma membrane and any external encapsulating structures such as the cell wall and cell envelope. [GOC:ai]	3	GO:2001168;GO:0033129;GO:2000144	2	F1RU26;C9E1C9	F1RU26(GO:2000144);C9E1C9(GO:0033129;GO:0033129;GO:2001168;GO:2001168)
GO:0046390	6	7	ribose phosphate biosynthetic process	biological_process	The chemical reactions and pathways resulting in the formation of ribose phosphate, any phosphorylated ribose sugar. [GOC:ai]	3	GO:0006228;GO:0006241;GO:0006183	1	F1RPV8	F1RPV8(GO:0006183;GO:0006228;GO:0006241)
GO:0010605	6	6	negative regulation of macromolecule metabolic process	biological_process	Any process that decreases the frequency, rate or extent of the chemical reactions and pathways involving macromolecules, any molecule of high relative molecular mass, the structure of which essentially comprises the multiple repetition of units derived, actually or conceptually, from molecules of low relative molecular mass. [GOC:dph, GOC:tb]	5	GO:0010951;GO:1900364;GO:0001933;GO:0010466;GO:2000117	3	K7GKY0;C9E1C9;Q0Z8R0	K7GKY0(GO:0001933;GO:0010951);C9E1C9(GO:1900364);Q0Z8R0(GO:0010466;GO:2000117)
GO:0010604	6	6	positive regulation of macromolecule metabolic process	biological_process	Any process that increases the frequency, rate or extent of the chemical reactions and pathways involving macromolecules, any molecule of high relative molecular mass, the structure of which essentially comprises the multiple repetition of units derived, actually or conceptually, from molecules of low relative molecular mass. [GOC:dph, GOC:tb]	6	GO:2001168;GO:0033129;GO:0010628;GO:0045737;GO:2000144;GO:0045944	6	C9E1C9;F1RP31;F1RU26;F1SEA5;F6Q8T7;I3LM88	C9E1C9(GO:0033129;GO:0033129;GO:0045944;GO:0045944;GO:2001168;GO:2001168);F1RP31(GO:0045944);F1RU26(GO:2000144);F1SEA5(GO:0010628);F6Q8T7(GO:0045737;GO:0045944);I3LM88(GO:0045944)
GO:0003690	6	6	double-stranded DNA binding	molecular_function	Interacting selectively and non-covalently with double-stranded DNA. [GOC:elh, GOC:vw]	4	GO:0000978;GO:0001164;GO:0000979;GO:0000977	5	F1SLA2;F1RU26;F1RP31;C9E1C9;I3LM88	F1SLA2(GO:0001164);F1RU26(GO:0000977;GO:0000978);F1RP31(GO:0000977);C9E1C9(GO:0000979);I3LM88(GO:0000978)
GO:1902108	6	8	regulation of mitochondrial membrane permeability involved in apoptotic process	biological_process	Any regulation of mitochondrial membrane permeability that is involved in apoptotic process. [GOC:mtg_apoptosis, GOC:pm, GOC:TermGenie, PMID:19168129]	1	GO:0097345	1	I3LDJ9	I3LDJ9(GO:0097345)
GO:0031349	6	7	positive regulation of defense response	biological_process	Any process that activates or increases the frequency, rate or extent of a defense response. [GOC:mah]	2	GO:0034157;GO:0034165	1	F1S9L2	F1S9L2(GO:0034157;GO:0034165)
GO:1901659	6	6	glycosyl compound biosynthetic process	biological_process	The chemical reactions and pathways resulting in the formation of glycosyl compound. [GOC:pr, GOC:TermGenie]	3	GO:0006228;GO:0006241;GO:0006183	1	F1RPV8	F1RPV8(GO:0006183;GO:0006228;GO:0006241)
GO:0002819	6	6	regulation of adaptive immune response	biological_process	Any process that modulates the frequency, rate, or extent of an adaptive immune response. [GOC:add]	1	GO:2000553	1	F1S9L2	F1S9L2(GO:2000553)
GO:0009891	6	6	positive regulation of biosynthetic process	biological_process	Any process that activates or increases the frequency, rate or extent of the chemical reactions and pathways resulting in the formation of substances. [GOC:go_curators]	2	GO:0045944;GO:2000144	5	F6Q8T7;F1RP31;C9E1C9;F1RU26;I3LM88	F6Q8T7(GO:0045944);F1RP31(GO:0045944);C9E1C9(GO:0045944;GO:0045944);F1RU26(GO:2000144);I3LM88(GO:0045944)
GO:0006220	6	9	pyrimidine nucleotide metabolic process	biological_process	The chemical reactions and pathways involving a pyrimidine nucleotide, a compound consisting of nucleoside (a pyrimidine base linked to a deoxyribose or ribose sugar) esterified with a phosphate group at either the 3' or 5'-hydroxyl group of the sugar. [GOC:go_curators, ISBN:0198506732]	2	GO:0006228;GO:0006241	1	F1RPV8	F1RPV8(GO:0006228;GO:0006241)
GO:0031347	6	6	regulation of defense response	biological_process	Any process that modulates the frequency, rate or extent of a defense response. [GOC:mah]	2	GO:0034157;GO:0034165	1	F1S9L2	F1S9L2(GO:0034157;GO:0034165)
GO:0015833	6	7	peptide transport	biological_process	The directed movement of peptides, compounds of two or more amino acids where the alpha carboxyl group of one is bound to the alpha amino group of another, into, out of or within a cell, or between cells, by means of some agent such as a transporter or pore. [GOC:ai]	4	GO:0009306;GO:0015031;GO:0035735;GO:0042073	3	F1SJ46;F1RNN4;F1SED4	F1SJ46(GO:0015031);F1RNN4(GO:0035735;GO:0042073;GO:0042073);F1SED4(GO:0009306)
GO:0003400	6	9	regulation of COPII vesicle coating	biological_process	Any process that modulates the rate, frequency, or extent of the addition of COPII proteins and adaptor proteins to ER membranes during the formation of transport vesicles, forming a vesicle coat. [GOC:ascb_2009, GOC:dph, GOC:jp, GOC:tb]	1	GO:0003400	1	F1SED4	F1SED4(GO:0003400)
GO:0032386	6	6	regulation of intracellular transport	biological_process	Any process that modulates the frequency, rate or extent of the directed movement of substances within cells. [GOC:mah]	1	GO:0003400	1	F1SED4	F1SED4(GO:0003400)
GO:0004649	6	6	poly(ADP-ribose) glycohydrolase activity	molecular_function	Catalysis of the hydrolysis of poly(ADP-ribose) at glycosidic (1''-2') linkage of ribose-ribose bond to produce free ADP-ribose. [EC:3.2.1.143]	1	GO:0004649	1	F1SDW4	F1SDW4(GO:0004649)
GO:0090087	6	6	regulation of peptide transport	biological_process	Any process that modulates the frequency, rate or extent of the directed movement of peptides, compounds of two or more amino acids where the alpha carboxyl group of one is bound to the alpha amino group of another, into, out of or within a cell, or between cells, by means of some agent such as a transporter or pore. [GOC:dph, GOC:tb]	1	GO:0050709	1	F1S9L2	F1S9L2(GO:0050709)
GO:0030100	6	7	regulation of endocytosis	biological_process	Any process that modulates the frequency, rate or extent of endocytosis. [GOC:go_curators]	2	GO:2000369;GO:0030100	2	I3LT15;F1RXZ6	I3LT15(GO:2000369);F1RXZ6(GO:0030100)
GO:0016485	6	7	protein processing	biological_process	Any protein maturation process achieved by the cleavage of a peptide bond or bonds within a protein. Protein maturation is the process leading to the attainment of the full functional capacity of a protein. [GOC:curators, GOC:jl, GOC:jsg]	1	GO:0016485	2	F1SUE6;I3LPC6	F1SUE6(GO:0016485;GO:0016485);I3LPC6(GO:0016485)
GO:0010501	6	8	RNA secondary structure unwinding	biological_process	The process in which a secondary structure of RNA are broken or 'melted'. [PMID:17169986]	1	GO:0010501	1	F1RFL5	F1RFL5(GO:0010501)
GO:0090501	6	8	RNA phosphodiester bond hydrolysis	biological_process	The RNA metabolic process in which the phosphodiester bonds between ribonucleotides are cleaved by hydrolysis. [GOC:dph, GOC:tb]	1	GO:0090502	1	F1SBX8	F1SBX8(GO:0090502)
GO:0072528	6	6	pyrimidine-containing compound biosynthetic process	biological_process	The chemical reactions and pathways resulting in the formation of a pyrimidine-containing compound, i.e. any compound that contains pyrimidine or a formal derivative thereof. [CHEBI:39447, GOC:mah]	2	GO:0006228;GO:0006241	1	F1RPV8	F1RPV8(GO:0006228;GO:0006241)
GO:0030554	6	7	adenyl nucleotide binding	molecular_function	Interacting selectively and non-covalently with adenyl nucleotides, any compound consisting of adenosine esterified with (ortho)phosphate. [ISBN:0198506732]	1	GO:0005524	7	C9E1C9;I3LT15;G9BWQ2;F1RFL5;F1SJG5;I3LFY4;I3LM88	C9E1C9(GO:0005524;GO:0005524);I3LT15(GO:0005524);G9BWQ2(GO:0005524;GO:0005524);F1RFL5(GO:0005524;GO:0005524);F1SJG5(GO:0005524);I3LFY4(GO:0005524);I3LM88(GO:0005524)
GO:0000266	6	6	mitochondrial fission	biological_process	The division of a mitochondrion within a cell to form two or more separate mitochondrial compartments. [PMID:11038192]	1	GO:0000266	1	K7GKN2	K7GKN2(GO:0000266)
GO:0010043	6	6	response to zinc ion	biological_process	Any process that results in a change in state or activity of a cell or an organism (in terms of movement, secretion, enzyme production, gene expression, etc.) as a result of a zinc ion stimulus. [GOC:sm]	1	GO:0071294	1	P79379	P79379(GO:0071294)
GO:0007283	6	6	spermatogenesis	biological_process	The process of formation of spermatozoa, including spermatocytogenesis and spermiogenesis. [GOC:jid, ISBN:9780878933846]	1	GO:0007283	1	F1RNN4	F1RNN4(GO:0007283)
GO:1902415	6	6	regulation of mRNA binding	biological_process	Any process that modulates the frequency, rate or extent of mRNA binding. [GOC:rb, GOC:TermGenie, PMID:22890846]	1	GO:1903839	1	C9E1C9	C9E1C9(GO:1903839)
GO:0016892	6	8	endoribonuclease activity, producing 3'-phosphomonoesters	molecular_function	Catalysis of the hydrolysis of ester linkages within ribonucleic acids by creating internal breaks to yield 3'-phosphomonoesters. [GOC:ai]	1	GO:0033897	1	F1SBX8	F1SBX8(GO:0033897)
GO:0016538	6	6	cyclin-dependent protein serine/threonine kinase regulator activity	molecular_function	Modulates the activity of a cyclin-dependent protein serine/threonine kinase, enzymes of the protein kinase family that are regulated through association with cyclins and other proteins. [GOC:pr, GOC:rn, PMID:7877684, PMID:9442875]	1	GO:0061575	1	F6Q8T7	F6Q8T7(GO:0061575)
GO:0001077	6	6	transcriptional activator activity, RNA polymerase II core promoter proximal region sequence-specific binding	molecular_function	Interacting selectively and non-covalently with a sequence of DNA that is in cis with and relatively close to a core promoter for RNA polymerase II (RNAP II) in order to activate or increase the frequency, rate or extent of transcription from the RNAP II promoter. [GOC:txnOH]	1	GO:0001077	1	I3LM88	I3LM88(GO:0001077)
GO:0001223	6	6	transcription coactivator binding	molecular_function	Interacting selectively and non-covalently with a transcription coactivator, any protein involved in positive regulation of transcription via protein-protein interactions with transcription factors and other proteins that positively regulate transcription. Transcription coactivators do not bind DNA directly, but rather mediate protein-protein interactions between activating transcription factors …	1	GO:0001223	1	C9E1C9	C9E1C9(GO:0001223)
GO:0002828	6	6	regulation of type 2 immune response	biological_process	Any process that modulates the frequency, rate, or extent of a type 2 immune response. [GOC:add]	1	GO:2000553	1	F1S9L2	F1S9L2(GO:2000553)
GO:1903844	6	6	regulation of cellular response to transforming growth factor beta stimulus	biological_process	Any process that modulates the frequency, rate or extent of cellular response to transforming growth factor beta stimulus. [GO_REF:0000058, GOC:BHF, GOC:BHF_miRNA, GOC:rph, GOC:TermGenie, PMID:22269326]	1	GO:0030512	1	K7GKY0	K7GKY0(GO:0030512)
GO:0061525	6	6	hindgut development	biological_process	The process whose specific outcome is the progression of the hindgut over time, from its formation to the mature structure. The hindgut is part of the alimentary canal that lies posterior to the midgut. [GOC:dph]	1	GO:0061525	1	I3LPC6	I3LPC6(GO:0061525)
GO:0005524	6	9	ATP binding	molecular_function	Interacting selectively and non-covalently with ATP, adenosine 5'-triphosphate, a universally important coenzyme and enzyme regulator. [ISBN:0198506732]	1	GO:0005524	7	C9E1C9;I3LT15;G9BWQ2;F1RFL5;F1SJG5;I3LFY4;I3LM88	C9E1C9(GO:0005524;GO:0005524);I3LT15(GO:0005524);G9BWQ2(GO:0005524;GO:0005524);F1RFL5(GO:0005524;GO:0005524);F1SJG5(GO:0005524);I3LFY4(GO:0005524);I3LM88(GO:0005524)
GO:0005525	6	9	GTP binding	molecular_function	Interacting selectively and non-covalently with GTP, guanosine triphosphate. [GOC:ai]	1	GO:0005525	1	K7GKN2	K7GKN2(GO:0005525;GO:0005525)
GO:0015629	6	7	actin cytoskeleton	cellular_component	The part of the cytoskeleton (the internal framework of a cell) composed of actin and associated proteins. Includes actin cytoskeleton-associated complexes. [GOC:jl, ISBN:0395825172, ISBN:0815316194]	1	GO:0015629	1	F1RWS7	F1RWS7(GO:0015629)
GO:0098840	6	10	protein transport along microtubule	biological_process	The directed movement of a protein along a microtubule, mediated by motor proteins. [PMID:25987607]	2	GO:0035735;GO:0042073	1	F1RNN4	F1RNN4(GO:0035735;GO:0042073;GO:0042073)
GO:0032268	6	7	regulation of cellular protein metabolic process	biological_process	Any process that modulates the frequency, rate or extent of the chemical reactions and pathways involving a protein, occurring at the level of an individual cell. [GOC:mah]	10	GO:2001168;GO:2000117;GO:0033129;GO:0010466;GO:0045737;GO:0051438;GO:0031056;GO:0010951;GO:0001933;GO:0000079	5	F1S6I1;F6Q8T7;C9E1C9;Q0Z8R0;K7GKY0	F1S6I1(GO:0051438);F6Q8T7(GO:0000079;GO:0045737);C9E1C9(GO:0031056;GO:0033129;GO:0033129;GO:2001168;GO:2001168);Q0Z8R0(GO:0010466;GO:2000117);K7GKY0(GO:0001933;GO:0010951)
GO:0031334	6	7	positive regulation of protein complex assembly	biological_process	Any process that activates or increases the frequency, rate or extent of protein complex assembly. [GOC:mah]	1	GO:2000144	1	F1RU26	F1RU26(GO:2000144)
GO:1901293	6	8	nucleoside phosphate biosynthetic process	biological_process	The chemical reactions and pathways resulting in the formation of a nucleoside phosphate. [GOC:TermGenie]	3	GO:0006228;GO:0006241;GO:0006183	1	F1RPV8	F1RPV8(GO:0006183;GO:0006228;GO:0006241)
GO:0009451	6	8	RNA modification	biological_process	The covalent alteration of one or more nucleotides within an RNA molecule to produce an RNA molecule with a sequence that differs from that coded genetically. [GOC:go_curators, ISBN:1555811337]	2	GO:0000154;GO:0031167	1	F1RHJ0	F1RHJ0(GO:0000154;GO:0031167)
GO:0032561	6	8	guanyl ribonucleotide binding	molecular_function	Interacting selectively and non-covalently with a guanyl ribonucleotide, any compound consisting of guanosine esterified with (ortho)phosphate or an oligophosphate at any hydroxyl group on the ribose moiety. [GOC:mah]	1	GO:0005525	1	K7GKN2	K7GKN2(GO:0005525;GO:0005525)
GO:0050792	6	6	regulation of viral process	biological_process	Any process that modulates the rate or extent of the viral life cycle, the set of processes by which a virus reproduces and spreads among hosts. [GOC:go_curators, GOC:tb]	3	GO:1901253;GO:0045071;GO:0043923	3	K7GKN2;F1RWS7;F1S9L2	K7GKN2(GO:0045071;GO:0045071;GO:1901253);F1RWS7(GO:0043923);F1S9L2(GO:0045071;GO:0045071)
GO:0045005	6	8	DNA-dependent DNA replication maintenance of fidelity	biological_process	A DNA metabolic process that prevents or corrects errors to ensure that DNA is replicated accurately. Errors can be corrected either by intrinsic DNA polymerase proofreading activity or via mismatch repair. [GOC:mah, GOC:vw]	1	GO:0031297	1	C9E1C9	C9E1C9(GO:0031297)
GO:0070167	6	6	regulation of biomineral tissue development	biological_process	Any process that modulates the frequency, rate or extent of biomineral tissue development, the formation of hard tissues that consist mainly of inorganic compounds. [GOC:mah]	1	GO:0030500	1	I3LT15	I3LT15(GO:0030500)
GO:0006334	6	8	nucleosome assembly	biological_process	The aggregation, arrangement and bonding together of a nucleosome, the beadlike structural units of eukaryotic chromatin composed of histones and DNA. [GOC:mah]	2	GO:0006334;GO:0006335	1	F1S7L7	F1S7L7(GO:0006334;GO:0006335)
GO:0006487	6	9	protein N-linked glycosylation	biological_process	A protein glycosylation process in which a carbohydrate or carbohydrate derivative unit is added to a protein via the N4 atom of peptidyl-asparagine, the omega-N of arginine, or the N1' atom peptidyl-tryptophan. [GOC:pr, RESID:AA0151, RESID:AA0156, RESID:AA0327]	1	GO:0018279	1	F1RP50	F1RP50(GO:0018279)
GO:0005680	6	7	anaphase-promoting complex	cellular_component	A ubiquitin ligase complex that degrades mitotic cyclins and anaphase inhibitory protein, thereby triggering sister chromatid separation and exit from mitosis. Substrate recognition by APC occurs through degradation signals, the most common of which is termed the Dbox degradation motif, originally discovered in cyclin B. [GOC:jh, GOC:vw, PMID:10465783, PMID:10611969]	1	GO:0005680	1	I3L7Q8	I3L7Q8(GO:0005680)
GO:0051052	6	7	regulation of DNA metabolic process	biological_process	Any process that modulates the frequency, rate or extent of the chemical reactions and pathways involving DNA. [GOC:ai]	1	GO:0006282	1	C9E1C9	C9E1C9(GO:0006282)
GO:1901252	6	8	regulation of intracellular transport of viral material	biological_process	Any process that modulates the frequency, rate or extent of egress of virus within host cell. [GOC:bf, GOC:jl, GOC:TermGenie]	1	GO:1901253	1	K7GKN2	K7GKN2(GO:1901253)
GO:1901253	6	9	negative regulation of intracellular transport of viral material	biological_process	Any process that stops, prevents or reduces the frequency, rate or extent of intracellular transport of viral material. [GOC:bf, GOC:jl, GOC:TermGenie]	1	GO:1901253	1	K7GKN2	K7GKN2(GO:1901253)
GO:1904029	6	11	regulation of cyclin-dependent protein kinase activity	biological_process	Any process that modulates the frequency, rate or extent of cyclin-dependent protein kinase activity. [GO_REF:0000059, GOC:als, GOC:TermGenie, PMID:22995177]	2	GO:0000079;GO:0045737	1	F6Q8T7	F6Q8T7(GO:0000079;GO:0045737)
GO:0008593	6	7	regulation of Notch signaling pathway	biological_process	Any process that modulates the frequency, rate or extent of the Notch signaling pathway. [GOC:go_curators]	1	GO:0045747	1	I3LT15	I3LT15(GO:0045747)
GO:0035251	6	7	UDP-glucosyltransferase activity	molecular_function	Catalysis of the transfer of a glucosyl group from UDP-glucose to an acceptor molecule. [http://www.chem.qmul.ac.uk/iubmb/enzyme/reaction/polysacc/UDPsugar.html]	1	GO:0003980	1	F1RP50	F1RP50(GO:0003980;GO:0003980)
GO:0043009	6	7	chordate embryonic development	biological_process	The process whose specific outcome is the progression of the embryo over time, from zygote formation through a stage including a notochord and neural tube until birth or egg hatching. [GOC:mtg_sensu]	1	GO:0001701	1	F1RU26	F1RU26(GO:0001701)
GO:0051347	6	6	positive regulation of transferase activity	biological_process	Any process that activates or increases the frequency, rate or extent of transferase activity, the catalysis of the transfer of a group, e.g. a methyl group, glycosyl group, acyl group, phosphorus-containing, or other groups, from a donor compound to an acceptor. [GOC:ai]	1	GO:0045737	1	F6Q8T7	F6Q8T7(GO:0045737)
GO:0051346	6	6	negative regulation of hydrolase activity	biological_process	Any process that stops or reduces the rate of hydrolase activity, the catalysis of the hydrolysis of various bonds. [GOC:ai]	3	GO:0010951;GO:2000117;GO:0010466	2	K7GKY0;Q0Z8R0	K7GKY0(GO:0010951);Q0Z8R0(GO:0010466;GO:2000117)
GO:0051345	6	6	positive regulation of hydrolase activity	biological_process	Any process that activates or increases the frequency, rate or extent of hydrolase activity, the catalysis of the hydrolysis of various bonds. [GOC:ai]	1	GO:0043547	1	F1SED4	F1SED4(GO:0043547)
GO:0010556	6	6	regulation of macromolecule biosynthetic process	biological_process	Any process that modulates the rate, frequency or extent of the chemical reactions and pathways resulting in the formation of a macromolecule, any molecule of high relative molecular mass, the structure of which essentially comprises the multiple repetition of units derived, actually or conceptually, from molecules of low relative molecular mass. [GOC:dph, GOC:tb]	7	GO:0070940;GO:0070816;GO:0006355;GO:0006357;GO:0045944;GO:2000144;GO:0043923	8	C9E1C9;F1RP31;F1SG36;F1RU26;F1SJG5;F1RWS7;F6Q8T7;I3LM88	C9E1C9(GO:0045944;GO:0045944;GO:0070816);F1RP31(GO:0006355;GO:0006355;GO:0045944);F1SG36(GO:0006355);F1RU26(GO:0006355;GO:0006357;GO:2000144);F1SJG5(GO:0006355);F1RWS7(GO:0043923;GO:0070940);F6Q8T7(GO:0006355;GO:0006357;GO:0006357;GO:0045944);I3LM88(GO:0006357;GO:0045944)
GO:0045088	6	7	regulation of innate immune response	biological_process	Any process that modulates the frequency, rate or extent of the innate immune response, the organism's first line of defense against infection. [GOC:ebc]	2	GO:0034157;GO:0034165	1	F1S9L2	F1S9L2(GO:0034157;GO:0034165)
GO:0007512	6	6	adult heart development	biological_process	The process whose specific outcome is the progression of the adult heart over time, from its formation to the mature structure. [GOC:bf]	1	GO:0007512	1	F6Q8T7	F6Q8T7(GO:0007512)
GO:0004550	6	7	nucleoside diphosphate kinase activity	molecular_function	Catalysis of the reaction: ATP + nucleoside diphosphate = ADP + nucleoside triphosphate. [EC:2.7.4.6]	1	GO:0004550	1	F1RPV8	F1RPV8(GO:0004550)
GO:0030295	6	6	protein kinase activator activity	molecular_function	Binds to and increases the activity of a protein kinase, an enzyme which phosphorylates a protein. [GOC:ai]	1	GO:0061575	1	F6Q8T7	F6Q8T7(GO:0061575)
GO:0008285	6	6	negative regulation of cell proliferation	biological_process	Any process that stops, prevents or reduces the rate or extent of cell proliferation. [GOC:go_curators]	2	GO:0050680;GO:0010839	2	K7GKY0;I3LPC6	K7GKY0(GO:0010839);I3LPC6(GO:0050680)
GO:0043087	6	6	regulation of GTPase activity	biological_process	Any process that modulates the rate of GTP hydrolysis by a GTPase. [GOC:jl, GOC:mah]	1	GO:0043547	1	F1SED4	F1SED4(GO:0043547)
GO:0033619	6	7	membrane protein proteolysis	biological_process	The proteolytic cleavage of a transmembrane protein leading to the release of its intracellular or ecto-domains. [GOC:pde]	1	GO:0031293	1	F1S8G9	F1S8G9(GO:0031293)
GO:0010458	6	6	exit from mitosis	biological_process	The cell cycle transition where a cell leaves M phase and enters a new G1 phase. M phase is the part of the mitotic cell cycle during which mitosis and cytokinesis take place. [GOC:dph, GOC:tb]	1	GO:0010458	1	F1RWS7	F1RWS7(GO:0010458)
GO:0030217	6	7	T cell differentiation	biological_process	The process in which a precursor cell type acquires characteristics of a more mature T-cell. A T cell is a type of lymphocyte whose definin characteristic is the expression of a T cell receptor complex. [GO_REF:0000022, GOC:jid, GOC:mah, GOC:mtg_15nov05]	1	GO:0043367	1	F1S9L2	F1S9L2(GO:0043367)
GO:0031167	6	12	rRNA methylation	biological_process	The posttranscriptional addition of methyl groups to specific residues in an rRNA molecule. [GOC:mah]	1	GO:0031167	1	F1RHJ0	F1RHJ0(GO:0031167)
GO:0070001	6	6	aspartic-type peptidase activity	molecular_function	Catalysis of the hydrolysis of peptide bonds in a polypeptide chain by a mechanism in which a water molecule bound by the side chains of aspartic residues at the active center acts as a nucleophile. [GOC:mah, http://merops.sanger.ac.uk/about/glossary.htm#CATTYPE]	2	GO:0042500;GO:0004190	1	F1S8G9	F1S8G9(GO:0004190;GO:0042500)
GO:0048209	6	7	regulation of vesicle targeting, to, from or within Golgi	biological_process	Any process that modulates the frequency, rate, or destination of vesicle-mediated transport to, from or within the Golgi apparatus. [GOC:jid, GOC:mah, ISBN:0716731363, PMID:10219233]	1	GO:0003400	1	F1SED4	F1SED4(GO:0003400)
GO:0052547	6	8	regulation of peptidase activity	biological_process	Any process that modulates the frequency, rate or extent of peptidase activity, the hydrolysis of peptide bonds within proteins. [EC:3.4, GOC:ai]	3	GO:0010951;GO:2000117;GO:0010466	2	K7GKY0;Q0Z8R0	K7GKY0(GO:0010951);Q0Z8R0(GO:0010466;GO:2000117)
GO:0031462	6	7	Cul2-RING ubiquitin ligase complex	cellular_component	A ubiquitin ligase complex in which a cullin from the Cul2 subfamily and a RING domain protein form the catalytic core; substrate specificity is conferred by an elongin-BC adaptor and a SOCS/BC box protein. [PMID:15571813, PMID:15688063]	1	GO:0031462	1	F1S6I1	F1S6I1(GO:0031462)
GO:0090092	6	7	regulation of transmembrane receptor protein serine/threonine kinase signaling pathway	biological_process	Any process that modulates the rate, frequency, or extent of the series of molecular signals generated as a consequence of a transmembrane receptor serine/threonine kinase binding to its physiological ligand. [GOC:dph, GOC:tb]	1	GO:0030512	1	K7GKY0	K7GKY0(GO:0030512)
GO:2000142	6	11	regulation of DNA-templated transcription, initiation	biological_process	Any process that modulates the frequency, rate or extent of DNA-templated transcription initiation. [GOC:mah, GOC:txnOH]	1	GO:2000144	1	F1RU26	F1RU26(GO:2000144)
GO:0072522	6	6	purine-containing compound biosynthetic process	biological_process	The chemical reactions and pathways resulting in the formation of a purine-containing compound, i.e. any compound that contains purine or a formal derivative thereof. [CHEBI:26401, GOC:mah]	1	GO:0006183	1	F1RPV8	F1RPV8(GO:0006183)
GO:0005777	6	7	peroxisome	cellular_component	A small organelle enclosed by a single membrane, and found in most eukaryotic cells. Contains peroxidases and other enzymes involved in a variety of metabolic processes including free radical detoxification, lipid catabolism and biosynthesis, and hydrogen peroxide metabolism. [GOC:pm, PMID:9302272, UniProtKB-KW:KW-0576]	1	GO:0005777	1	F1SUE6	F1SUE6(GO:0005777;GO:0005777)
GO:0006163	6	9	purine nucleotide metabolic process	biological_process	The chemical reactions and pathways involving a purine nucleotide, a compound consisting of nucleoside (a purine base linked to a deoxyribose or ribose sugar) esterified with a phosphate group at either the 3' or 5'-hydroxyl group of the sugar. [GOC:go_curators, ISBN:0198506732]	1	GO:0006183	1	F1RPV8	F1RPV8(GO:0006183)
GO:0008757	6	6	S-adenosylmethionine-dependent methyltransferase activity	molecular_function	Catalysis of the transfer of a methyl group from S-adenosyl-L-methionine to a substrate. [GOC:mah]	2	GO:0000179;GO:0008649	1	F1RHJ0	F1RHJ0(GO:0000179;GO:0008649)
GO:0009163	6	8	nucleoside biosynthetic process	biological_process	The chemical reactions and pathways resulting in the formation of any one of a family of organic molecules consisting of a purine or pyrimidine base covalently bonded to a sugar ribose (a ribonucleoside) or deoxyribose (a deoxyribonucleoside). [GOC:jl, ISBN:0140512713]	3	GO:0006228;GO:0006241;GO:0006183	1	F1RPV8	F1RPV8(GO:0006183;GO:0006228;GO:0006241)
GO:0000790	6	7	nuclear chromatin	cellular_component	The ordered and organized complex of DNA, protein, and sometimes RNA, that forms the chromosome in the nucleus. [GOC:elh, PMID:20404130]	1	GO:0000790	1	F1S7L7	F1S7L7(GO:0000790)
GO:0001947	6	8	heart looping	biological_process	The tube morphogenesis process in which the primitive heart tube loops asymmetrically. This looping brings the primitive heart chambers into alignment preceding their future integration. Heart looping begins with dextral-looping and ends when the main regional divisions of the mature heart and primordium of the great arterial trunks become established preceeding septation. [GOC:dph, PMID:12094232]	1	GO:0001947	1	I3LPC6	I3LPC6(GO:0001947)
GO:0046631	6	7	alpha-beta T cell activation	biological_process	The change in morphology and behavior of an alpha-beta T cell resulting from exposure to a mitogen, cytokine, chemokine, cellular ligand, or an antigen for which it is specific. [GOC:add]	2	GO:0043367;GO:0035710	1	F1S9L2	F1S9L2(GO:0035710;GO:0043367)
GO:0001091	6	6	RNA polymerase II basal transcription factor binding	molecular_function	Interacting selectively and non-covalently with a basal RNA polymerase II transcription factor, any of the factors involved in formation of the preinitiation complex (PIC) by RNA polymerase II and defined as a basal or general transcription factor. [GOC:txnOH, PMID:16858867]	1	GO:0001096	1	F1RWS7	F1RWS7(GO:0001096)
GO:0032580	6	7	Golgi cisterna membrane	cellular_component	The lipid bilayer surrounding any of the thin, flattened compartments that form the central portion of the Golgi complex. [GOC:ecd, GOC:mah]	1	GO:0032580	1	F1SA54	F1SA54(GO:0032580;GO:0032580)
GO:0071556	6	8	integral component of lumenal side of endoplasmic reticulum membrane	cellular_component	The component of the endoplasmic reticulum membrane consisting of the gene products that penetrate only the lumenal side of the membrane. [GOC:dos, GOC:mah]	1	GO:0071556	1	F1S8G9	F1S8G9(GO:0071556)
GO:0008017	6	6	microtubule binding	molecular_function	Interacting selectively and non-covalently with microtubules, filaments composed of tubulin monomers. [GOC:krc]	1	GO:0008017	1	K7GKN2	K7GKN2(GO:0008017)
GO:0016514	6	8	SWI/SNF complex	cellular_component	A SWI/SNF-type complex that contains 8 to 14 proteins, including both conserved (core) and nonconserved components; contains the ATPase product of the yeast SNF2 or mammalian SMARCA4/BAF190A/BRG1 gene, or an ortholog thereof. [GOC:bm, PMID:12672490]	1	GO:0016514	1	F1SJG5	F1SJG5(GO:0016514)
GO:0008353	6	8	RNA polymerase II carboxy-terminal domain kinase activity	molecular_function	Catalysis of the reaction: ATP + (DNA-directed RNA polymerase II) = ADP + phospho-(DNA-directed RNA polymerase II); phosphorylation occurs on residues in the carboxy-terminal domain (CTD) repeats. [EC:2.7.11.23, GOC:mah]	1	GO:0008353	2	F6Q8T7;C9E1C9	F6Q8T7(GO:0008353);C9E1C9(GO:0008353;GO:0008353;GO:0008353)
GO:0060628	6	7	regulation of ER to Golgi vesicle-mediated transport	biological_process	Any process that modulates the rate, frequency, or extent of ER to Golgi vesicle-mediated transport, the directed movement of substances from the endoplasmic reticulum (ER) to the Golgi, mediated by COP II vesicles. Small COP II coated vesicles form from the ER and then fuse directly with the cis-Golgi. Larger structures are transported along microtubules to the cis-Golgi. [GOC:dph, GOC:tb]	1	GO:0003400	1	F1SED4	F1SED4(GO:0003400)
GO:0030003	6	8	cellular cation homeostasis	biological_process	Any process involved in the maintenance of an internal steady state of cations at the level of a cell. [GOC:ceb, GOC:mah]	2	GO:0051480;GO:0006882	2	P79379;Q06A97	P79379(GO:0006882);Q06A97(GO:0051480)
GO:0000975	6	6	regulatory region DNA binding	molecular_function	Interacting selectively and non-covalently with a DNA region that regulates a DNA-based process. Such processes include transcription, DNA replication, and DNA repair. [GOC:txnOH]	5	GO:0000978;GO:0044212;GO:0001164;GO:0000979;GO:0000977	5	F1SLA2;F1RU26;F1RP31;C9E1C9;I3LM88	F1SLA2(GO:0001164);F1RU26(GO:0000977;GO:0000978);F1RP31(GO:0000977);C9E1C9(GO:0000979;GO:0044212;GO:0044212);I3LM88(GO:0000978)
GO:0006461	6	6	protein complex assembly	biological_process	The aggregation, arrangement and bonding together of a set of components to form a protein complex. [GOC:ai]	2	GO:0003374;GO:0051260	2	K7GKN2;F1SUE6	K7GKN2(GO:0003374);F1SUE6(GO:0051260)
GO:0006464	6	7	cellular protein modification process	biological_process	The covalent alteration of one or more amino acids occurring in proteins, peptides and nascent polypeptides (co-translational, post-translational modifications) occurring at the level of an individual cell. Includes the modification of charged tRNAs that are destined to occur in a protein (pre-translation modification). [GOC:go_curators]	10	GO:0006468;GO:0018105;GO:0070940;GO:0006486;GO:0070979;GO:0006470;GO:0070816;GO:0016567;GO:0033578;GO:0018279	9	C9E1C9;I3LT15;G9BWQ2;F1RWS7;F1RP50;I3L7Q8;F1S6I1;F6Q8T7;F1SA54	C9E1C9(GO:0006468;GO:0006468;GO:0070816);I3LT15(GO:0006468;GO:0006468);G9BWQ2(GO:0006468;GO:0018105);F1RWS7(GO:0006470;GO:0070940);F1RP50(GO:0006486;GO:0018279);I3L7Q8(GO:0070979);F1S6I1(GO:0016567);F6Q8T7(GO:0006468);F1SA54(GO:0006486;GO:0033578)
GO:1903531	6	8	negative regulation of secretion by cell	biological_process	Any process that stops, prevents or reduces the frequency, rate or extent of secretion by cell. [GO_REF:0000058, GOC:pm, GOC:TermGenie, PMID:12130530]	1	GO:0050709	1	F1S9L2	F1S9L2(GO:0050709)
GO:0099118	6	9	microtubule-based protein transport	biological_process	A microtubule-based process that results in the transport of proteins. [GOC:vw]	2	GO:0035735;GO:0042073	1	F1RNN4	F1RNN4(GO:0035735;GO:0042073;GO:0042073)
GO:0005509	6	6	calcium ion binding	molecular_function	Interacting selectively and non-covalently with calcium ions (Ca2+). [GOC:ai]	1	GO:0005509	3	Q06A97;F1SP42;E7CXS1	Q06A97(GO:0005509;GO:0005509);F1SP42(GO:0005509);E7CXS1(GO:0005509)
GO:0016591	6	9	DNA-directed RNA polymerase II, holoenzyme	cellular_component	A nuclear DNA-directed RNA polymerase complex containing an RNA polymerase II core enzyme as well as additional proteins and transcription factor complexes, that are capable of promoter recognition and transcription initiation from an RNA polymerase II promoter in vivo. These additional components may include general transcription factor complexes TFIIA, TFIID, TFIIE, TFIIF, or TFIIH, as well as …	1	GO:0016591	1	F1RWS7	F1RWS7(GO:0016591)
GO:0006213	6	8	pyrimidine nucleoside metabolic process	biological_process	The chemical reactions and pathways involving any pyrimidine nucleoside, one of a family of organic molecules consisting of a pyrimidine base covalently bonded to ribose (a ribonucleoside) or deoxyribose (a deoxyribonucleoside). [GOC:jl, ISBN:0140512713]	2	GO:0006228;GO:0006241	1	F1RPV8	F1RPV8(GO:0006228;GO:0006241)
GO:0050778	6	6	positive regulation of immune response	biological_process	Any process that activates or increases the frequency, rate or extent of the immune response, the immunological reaction of an organism to an immunogenic stimulus. [GOC:ai]	3	GO:0034157;GO:2000553;GO:0034165	1	F1S9L2	F1S9L2(GO:0034157;GO:0034165;GO:2000553)
GO:0015931	6	6	nucleobase-containing compound transport	biological_process	The directed movement of nucleobases, nucleosides, nucleotides and nucleic acids, into, out of or within a cell, or between cells, by means of some agent such as a transporter or pore. [GOC:ai]	2	GO:0016973;GO:0006406	1	F1SJQ4	F1SJQ4(GO:0006406;GO:0016973)
GO:0006396	6	8	RNA processing	biological_process	Any process involved in the conversion of one or more primary RNA transcripts into one or more mature RNA molecules. [GOC:mah]	5	GO:0016180;GO:0000154;GO:0030490;GO:0006364;GO:0031167	3	F1RFZ6;F1STY6;F1RHJ0	F1RFZ6(GO:0006364;GO:0006364;GO:0030490);F1STY6(GO:0016180);F1RHJ0(GO:0000154;GO:0031167)
GO:0010970	6	7	transport along microtubule	biological_process	The movement of organelles or other particles from one location in the cell to another along microtubules, driven by motor activity. [GOC:dph, GOC:mah, GOC:tb]	2	GO:0035735;GO:0042073	1	F1RNN4	F1RNN4(GO:0035735;GO:0042073;GO:0042073)
GO:0002703	6	6	regulation of leukocyte mediated immunity	biological_process	Any process that modulates the frequency, rate, or extent of leukocyte mediated immunity. [GOC:add]	1	GO:2000553	1	F1S9L2	F1S9L2(GO:2000553)
GO:0002700	6	6	regulation of production of molecular mediator of immune response	biological_process	Any process that modulates the frequency, rate, or extent of the production of molecular mediator of immune response. [GOC:add]	1	GO:2000553	1	F1S9L2	F1S9L2(GO:2000553)
GO:0009132	6	8	nucleoside diphosphate metabolic process	biological_process	The chemical reactions and pathways involving a nucleoside diphosphate, a compound consisting of a nucleobase linked to a deoxyribose or ribose sugar esterified with diphosphate on the sugar. [GOC:go_curators, ISBN:0198506732]	1	GO:0006165	1	F1RPV8	F1RPV8(GO:0006165)
GO:0060271	6	7	cilium assembly	biological_process	The assembly of a cilium, a specialized eukaryotic organelle that consists of a filiform extrusion of the cell surface. Each cilium is bounded by an extrusion of the cytoplasmic membrane, and contains a regular longitudinal array of microtubules, anchored basally in a centriole. [GOC:BHF, GOC:cilia, GOC:dph, GOC:kmv, GOC:pr, GOC:vw, ISBN:0198506732, PMID:13978319, PMID:27350441, Reactome:R-HSA-56…	2	GO:1905515;GO:0060271	2	F1RNN4;I3LPC6	F1RNN4(GO:0060271;GO:0060271;GO:0060271);I3LPC6(GO:0060271;GO:0060271;GO:0060271;GO:1905515)
GO:0050801	6	6	ion homeostasis	biological_process	Any process involved in the maintenance of an internal steady state of ions within an organism or cell. [GOC:ai]	2	GO:0051480;GO:0006882	2	P79379;Q06A97	P79379(GO:0006882);Q06A97(GO:0051480)
GO:0097359	6	8	UDP-glucosylation	biological_process	The covalent attachment of a UDP-glucose residue to a substrate molecule. [GOC:al]	1	GO:0097359	1	F1RP50	F1RP50(GO:0097359)
GO:0001838	6	6	embryonic epithelial tube formation	biological_process	The morphogenesis of an embryonic epithelium into a tube-shaped structure. [GOC:dph, ISBN:0824072820]	1	GO:0001841	1	I3LPC6	I3LPC6(GO:0001841)
GO:1905216	6	6	positive regulation of RNA binding	biological_process	Any process that activates or increases the frequency, rate or extent of RNA binding. [GO_REF:0000059, GOC:bf, GOC:PARL, GOC:TermGenie, PMID:25116364]	1	GO:1903839	1	C9E1C9	C9E1C9(GO:1903839)
GO:0019901	6	6	protein kinase binding	molecular_function	Interacting selectively and non-covalently with a protein kinase, any enzyme that catalyzes the transfer of a phosphate group, usually from ATP, to a protein substrate. [GOC:jl]	1	GO:0019901	1	C9E1C9	C9E1C9(GO:0019901)
GO:0019903	6	6	protein phosphatase binding	molecular_function	Interacting selectively and non-covalently with any protein phosphatase. [GOC:jl]	1	GO:0019903	1	I3L7Q8	I3L7Q8(GO:0019903)
GO:0042278	6	8	purine nucleoside metabolic process	biological_process	The chemical reactions and pathways involving one of a family of organic molecules consisting of a purine base covalently bonded to a sugar ribose (a ribonucleoside) or deoxyribose (a deoxyribonucleoside). [GOC:jl, ISBN:0140512713]	1	GO:0006183	1	F1RPV8	F1RPV8(GO:0006183)
GO:0051174	6	6	regulation of phosphorus metabolic process	biological_process	Any process that modulates the frequency, rate or extent of the chemical reactions and pathways involving phosphorus or compounds containing phosphorus. [GOC:ai]	4	GO:0001933;GO:0033129;GO:0045737;GO:0000079	3	K7GKY0;F6Q8T7;C9E1C9	K7GKY0(GO:0001933);F6Q8T7(GO:0000079;GO:0045737);C9E1C9(GO:0033129;GO:0033129)
GO:0051172	6	6	negative regulation of nitrogen compound metabolic process	biological_process	Any process that stops, prevents, or reduces the frequency, rate or extent of the chemical reactions and pathways involving nitrogen or nitrogenous compounds. [GOC:ai, GOC:tb]	5	GO:0010951;GO:1900364;GO:0001933;GO:0010466;GO:2000117	3	K7GKY0;C9E1C9;Q0Z8R0	K7GKY0(GO:0001933;GO:0010951);C9E1C9(GO:1900364);Q0Z8R0(GO:0010466;GO:2000117)
GO:0051173	6	6	positive regulation of nitrogen compound metabolic process	biological_process	Any process that activates or increases the frequency, rate or extent of the chemical reactions and pathways involving nitrogen or nitrogenous compounds. [GOC:ai, GOC:tb]	5	GO:2001168;GO:0045737;GO:0033129;GO:0045944;GO:2000144	5	F6Q8T7;F1RP31;C9E1C9;F1RU26;I3LM88	F6Q8T7(GO:0045737;GO:0045944);F1RP31(GO:0045944);C9E1C9(GO:0033129;GO:0033129;GO:0045944;GO:0045944;GO:2001168;GO:2001168);F1RU26(GO:2000144);I3LM88(GO:0045944)
GO:0043067	6	6	regulation of programmed cell death	biological_process	Any process that modulates the frequency, rate or extent of programmed cell death, cell death resulting from activation of endogenous cellular processes. [GOC:jl]	3	GO:0043065;GO:0042981;GO:0043068	2	I3LDJ9;F1RUL8	I3LDJ9(GO:0043065;GO:0043068);F1RUL8(GO:0042981)
GO:0031267	6	6	small GTPase binding	molecular_function	Interacting selectively and non-covalently with a small monomeric GTPase. [GOC:mah]	1	GO:0017048	1	I3LH80	I3LH80(GO:0017048)
GO:0019001	6	7	guanyl nucleotide binding	molecular_function	Interacting selectively and non-covalently with guanyl nucleotides, any compound consisting of guanosine esterified with (ortho)phosphate. [ISBN:0198506732]	1	GO:0005525	1	K7GKN2	K7GKN2(GO:0005525;GO:0005525)
GO:0032102	6	6	negative regulation of response to external stimulus	biological_process	Any process that stops, prevents, or reduces the frequency, rate or extent of a response to an external stimulus. [GOC:mah]	1	GO:0061045	1	K7GKY0	K7GKY0(GO:0061045)
GO:0034622	6	6	cellular macromolecular complex assembly	biological_process	The aggregation, arrangement and bonding together of a set of macromolecules to form a complex, carried out at the cellular level. [GOC:mah]	3	GO:0003374;GO:0006334;GO:0006335	2	K7GKN2;F1S7L7	K7GKN2(GO:0003374);F1S7L7(GO:0006334;GO:0006335)
GO:0001819	6	6	positive regulation of cytokine production	biological_process	Any process that activates or increases the frequency, rate or extent of production of a cytokine. [GOC:add, ISBN:0781735149]	1	GO:2000553	1	F1S9L2	F1S9L2(GO:2000553)
GO:0043604	6	6	amide biosynthetic process	biological_process	The chemical reactions and pathways resulting in the formation of an amide, any derivative of an oxoacid in which an acidic hydroxy group has been replaced by an amino or substituted amino group. [CHEBI:32988]	1	GO:0006412	1	I3LTC4	I3LTC4(GO:0006412)
GO:0019216	6	6	regulation of lipid metabolic process	biological_process	Any process that modulates the frequency, rate or extent of the chemical reactions and pathways involving lipids. [GOC:go_curators]	1	GO:0031998	1	F1SUE6	F1SUE6(GO:0031998;GO:0031998)
GO:0019219	6	6	regulation of nucleobase-containing compound metabolic process	biological_process	Any cellular process that modulates the frequency, rate or extent of the chemical reactions and pathways involving nucleobases, nucleosides, nucleotides and nucleic acids. [GOC:go_curators]	9	GO:0006282;GO:1900364;GO:0070816;GO:0006355;GO:0006357;GO:0045944;GO:2000144;GO:0043923;GO:0070940	8	C9E1C9;F1RP31;F1SG36;F1RU26;F1RWS7;F1SJG5;F6Q8T7;I3LM88	C9E1C9(GO:0006282;GO:0045944;GO:0045944;GO:0070816;GO:1900364);F1RP31(GO:0006355;GO:0006355;GO:0045944);F1SG36(GO:0006355);F1RU26(GO:0006355;GO:0006357;GO:2000144);F1RWS7(GO:0043923;GO:0070940);F1SJG5(GO:0006355);F6Q8T7(GO:0006355;GO:0006357;GO:0006357;GO:0045944);I3LM88(GO:0006357;GO:0045944)
GO:0120031	6	6	plasma membrane bounded cell projection assembly	biological_process	Formation of a prolongation or process extending and that is bounded by plasma membrane, e.g. a cilium, lamellipodium, or axon. [GOC:krc]	2	GO:1905515;GO:0060271	2	F1RNN4;I3LPC6	F1RNN4(GO:0060271;GO:0060271;GO:0060271);I3LPC6(GO:0060271;GO:0060271;GO:0060271;GO:1905515)
GO:0000315	6	7	organellar large ribosomal subunit	cellular_component	The larger of the two subunits of an organellar ribosome. Two sites on the ribosomal large subunit are involved in translation: the aminoacyl site (A site) and peptidyl site (P site). [GOC:mcc]	1	GO:0005762	1	I3LTC4	I3LTC4(GO:0005762)
GO:0050708	6	8	regulation of protein secretion	biological_process	Any process that modulates the frequency, rate or extent of the controlled release of a protein from a cell. [GOC:ai]	1	GO:0050709	1	F1S9L2	F1S9L2(GO:0050709)
GO:0010648	6	6	negative regulation of cell communication	biological_process	Any process that decreases the frequency, rate or extent of cell communication. Cell communication is the process that mediates interactions between a cell and its surroundings. Encompasses interactions such as signaling or attachment between one cell and another cell, between a cell and an extracellular matrix, or between a cell and any other aspect of its environment. [GOC:dph, GOC:tb]	1	GO:0030512	1	K7GKY0	K7GKY0(GO:0030512)
GO:0010647	6	6	positive regulation of cell communication	biological_process	Any process that increases the frequency, rate or extent of cell communication. Cell communication is the process that mediates interactions between a cell and its surroundings. Encompasses interactions such as signaling or attachment between one cell and another cell, between a cell and an extracellular matrix, or between a cell and any other aspect of its environment. [GOC:dph, GOC:tb]	5	GO:0045747;GO:0032008;GO:0034157;GO:0045880;GO:0034165	4	I3LT15;I3LF05;I3LPC6;F1S9L2	I3LT15(GO:0045747);I3LF05(GO:0032008);I3LPC6(GO:0045880);F1S9L2(GO:0034157;GO:0034165)
GO:0051592	6	6	response to calcium ion	biological_process	Any process that results in a change in state or activity of a cell or an organism (in terms of movement, secretion, enzyme production, gene expression, etc.) as a result of a calcium ion stimulus. [GOC:ai]	1	GO:0051592	1	F6Q8T7	F6Q8T7(GO:0051592)
GO:0010942	6	6	positive regulation of cell death	biological_process	Any process that increases the rate or frequency of cell death. Cell death is the specific activation or halting of processes within a cell so that its vital functions markedly cease, rather than simply deteriorating gradually over time, which culminates in cell death. [GOC:dph, GOC:tb]	2	GO:0043065;GO:0043068	1	I3LDJ9	I3LDJ9(GO:0043065;GO:0043068)
GO:0032559	6	8	adenyl ribonucleotide binding	molecular_function	Interacting selectively and non-covalently with an adenyl ribonucleotide, any compound consisting of adenosine esterified with (ortho)phosphate or an oligophosphate at any hydroxyl group on the ribose moiety. [GOC:mah]	1	GO:0005524	7	C9E1C9;I3LT15;G9BWQ2;F1RFL5;F1SJG5;I3LFY4;I3LM88	C9E1C9(GO:0005524;GO:0005524);I3LT15(GO:0005524);G9BWQ2(GO:0005524;GO:0005524);F1RFL5(GO:0005524;GO:0005524);F1SJG5(GO:0005524);I3LFY4(GO:0005524);I3LM88(GO:0005524)
GO:0032550	6	6	purine ribonucleoside binding	molecular_function	Interacting selectively and non-covalently with a purine ribonucleoside, a compound consisting of a purine base linked to ribose. [GOC:mah]	1	GO:0005525	1	K7GKN2	K7GKN2(GO:0005525;GO:0005525)
GO:0051252	6	7	regulation of RNA metabolic process	biological_process	Any process that modulates the frequency, rate or extent of the chemical reactions and pathways involving RNA. [GOC:ai]	8	GO:0070940;GO:1900364;GO:0070816;GO:0006355;GO:0006357;GO:0045944;GO:2000144;GO:0043923	8	C9E1C9;F1RP31;F1SG36;F1RU26;F1SJG5;F1RWS7;F6Q8T7;I3LM88	C9E1C9(GO:0045944;GO:0045944;GO:0070816;GO:1900364);F1RP31(GO:0006355;GO:0006355;GO:0045944);F1SG36(GO:0006355);F1RU26(GO:0006355;GO:0006357;GO:2000144);F1SJG5(GO:0006355);F1RWS7(GO:0043923;GO:0070940);F6Q8T7(GO:0006355;GO:0006357;GO:0006357;GO:0045944);I3LM88(GO:0006357;GO:0045944)
GO:0034198	6	8	cellular response to amino acid starvation	biological_process	Any process that results in a change in state or activity of a cell (in terms of movement, secretion, enzyme production, gene expression, etc.) as a result of deprivation of amino acids. [GOC:ecd]	1	GO:0034198	1	I3LF05	I3LF05(GO:0034198)
GO:0030856	6	6	regulation of epithelial cell differentiation	biological_process	Any process that modulates the frequency, rate or extent of epithelial cell differentiation. [GOC:mah]	1	GO:0045616	1	K7GKY0	K7GKY0(GO:0045616)
GO:0090575	6	7	RNA polymerase II transcription factor complex	cellular_component	A transcription factor complex that acts at promoters of genes transcribed by RNA polymerase II. [GOC:tb]	1	GO:0005675	1	F6Q8T7	F6Q8T7(GO:0005675;GO:0005675;GO:0005675)
GO:0007368	6	6	determination of left/right symmetry	biological_process	The establishment of an organism's body plan or part of an organism with respect to the left and right halves. The pattern can either be symmetric, such that the halves are mirror images, or asymmetric where the pattern deviates from this symmetry. [GOC:dph, GOC:jid]	1	GO:0007368	1	I3LPC6	I3LPC6(GO:0007368)
GO:0052312	6	9	modulation of transcription in other organism involved in symbiotic interaction	biological_process	Any process in which an organism modulates the frequency, rate or extent of transcription in a second organism, where the two organisms are in a symbiotic interaction. [GOC:mtg_pamgo_17jul06]	1	GO:0043923	1	F1RWS7	F1RWS7(GO:0043923)
GO:1902911	6	6	protein kinase complex	cellular_component	A protein complex which is capable of protein kinase activity. [GO_REF:0000088, GOC:bhm, GOC:TermGenie, PMID:24606918]	2	GO:0008024;GO:0005675	2	F6Q8T7;C9E1C9	F6Q8T7(GO:0005675;GO:0005675;GO:0005675);C9E1C9(GO:0008024;GO:0008024;GO:0008024)
GO:0090288	6	6	negative regulation of cellular response to growth factor stimulus	biological_process	Any process that decreases the rate, frequency, or extent of a change in state or activity of a cell (in terms of movement, secretion, enzyme production, gene expression, etc.) as a result of a growth factor stimulus. [GOC:BHF]	1	GO:0030512	1	K7GKY0	K7GKY0(GO:0030512)
GO:0004252	6	7	serine-type endopeptidase activity	molecular_function	Catalysis of the hydrolysis of internal, alpha-peptide bonds in a polypeptide chain by a catalytic mechanism that involves a catalytic triad consisting of a serine nucleophile that is activated by a proton relay involving an acidic residue (e.g. aspartate or glutamate) and a basic residue (usually histidine). [GOC:mah, http://merops.sanger.ac.uk/about/glossary.htm#CATTYPE, ISBN:0716720094]	1	GO:0004252	1	F1SUE6	F1SUE6(GO:0004252;GO:0004252)
GO:0051046	6	6	regulation of secretion	biological_process	Any process that modulates the frequency, rate or extent of the controlled release of a substance from a cell or a tissue. [GOC:ai]	1	GO:0050709	1	F1S9L2	F1S9L2(GO:0050709)
GO:0051048	6	7	negative regulation of secretion	biological_process	Any process that stops, prevents, or reduces the frequency, rate or extent of the controlled release of a substance from a cell or a tissue. [GOC:ai]	1	GO:0050709	1	F1S9L2	F1S9L2(GO:0050709)
GO:0016604	6	7	nuclear body	cellular_component	Extra-nucleolar nuclear domains usually visualized by confocal microscopy and fluorescent antibodies to specific proteins. [GOC:ma, PMID:10330182]	2	GO:0016607;GO:0016605	4	F1SLA2;F1RWS7;C9E1C9;F1SJQ4	F1SLA2(GO:0016607);F1RWS7(GO:0016607);C9E1C9(GO:0016605);F1SJQ4(GO:0016607)
GO:0009141	6	8	nucleoside triphosphate metabolic process	biological_process	The chemical reactions and pathways involving a nucleoside triphosphate, a compound consisting of a nucleobase linked to a deoxyribose or ribose sugar esterified with triphosphate on the sugar. [GOC:go_curators, ISBN:0198506732]	3	GO:0006228;GO:0006241;GO:0006183	1	F1RPV8	F1RPV8(GO:0006183;GO:0006228;GO:0006241)
GO:0051438	6	11	regulation of ubiquitin-protein transferase activity	biological_process	Any process that modulates the frequency, rate or extent of ubiquitin transferase activity. [GOC:ai, GOC:tb]	1	GO:0051438	1	F1S6I1	F1S6I1(GO:0051438)
GO:0001843	6	6	neural tube closure	biological_process	The last step in the formation of the neural tube, where the paired neural folds are brought together and fuse at the dorsal midline. [GOC:dph, ISBN:0878932437]	1	GO:0001843	1	I3LPC6	I3LPC6(GO:0001843)
GO:0071248	6	6	cellular response to metal ion	biological_process	Any process that results in a change in state or activity of a cell (in terms of movement, secretion, enzyme production, gene expression, etc.) as a result of a metal ion stimulus. [GOC:mah]	1	GO:0071294	1	P79379	P79379(GO:0071294)
GO:0042073	6	11	intraciliary transport	biological_process	The bidirectional movement of large protein complexes along microtubules within a cilium, mediated by motor proteins. [GOC:cilia, GOC:kmv, PMID:17981739, PMID:18180368, PMID:22869374, Reactome:R-HSA-5620924.2]	2	GO:0035735;GO:0042073	1	F1RNN4	F1RNN4(GO:0035735;GO:0042073;GO:0042073)
GO:0071458	6	8	integral component of cytoplasmic side of endoplasmic reticulum membrane	cellular_component	The component of the endoplasmic reticulum membrane consisting of the gene products that penetrate only the cytoplasmic side of the membrane. [GOC:dos, GOC:mah]	1	GO:0071458	1	F1S8G9	F1S8G9(GO:0071458)
GO:0006351	6	10	transcription, DNA-templated	biological_process	The cellular synthesis of RNA on a template of DNA. [GOC:jl, GOC:txnOH]	3	GO:0006351;GO:0061614;GO:0006366	4	F1RU26;I3LM88;F6Q8T7;F1RP31	F1RU26(GO:0061614);I3LM88(GO:0006366);F6Q8T7(GO:0006366);F1RP31(GO:0006351;GO:0006351)
GO:0001650	6	7	fibrillar center	cellular_component	A structure found most metazoan nucleoli, but not usually found in lower eukaryotes; surrounded by the dense fibrillar component; the zone of transcription from multiple copies of the pre-rRNA genes is in the border region between these two structures. [PMID:10754561]	1	GO:0001650	1	F1S9L2	F1S9L2(GO:0001650)
GO:0052472	6	10	modulation by host of symbiont transcription	biological_process	Any process in which an organism modulates the frequency, rate or extent of its symbiont's transcription. [GOC:mtg_pamgo_17jul06]	1	GO:0043923	1	F1RWS7	F1RWS7(GO:0043923)
GO:0043549	6	9	regulation of kinase activity	biological_process	Any process that modulates the frequency, rate or extent of kinase activity, the catalysis of the transfer of a phosphate group, usually from ATP, to a substrate molecule. [GOC:bf]	2	GO:0000079;GO:0045737	1	F6Q8T7	F6Q8T7(GO:0000079;GO:0045737)
GO:0008170	6	6	N-methyltransferase activity	molecular_function	Catalysis of the transfer of a methyl group to the nitrogen atom of an acceptor molecule. [GOC:ai]	1	GO:0000179	1	F1RHJ0	F1RHJ0(GO:0000179)
GO:0033043	6	6	regulation of organelle organization	biological_process	Any process that modulates the frequency, rate or extent of a process involved in the formation, arrangement of constituent parts, or disassembly of an organelle. [GOC:mah]	4	GO:2001168;GO:0033129;GO:0003400;GO:0031056	2	C9E1C9;F1SED4	C9E1C9(GO:0031056;GO:0033129;GO:0033129;GO:2001168;GO:2001168);F1SED4(GO:0003400)
GO:0009968	6	7	negative regulation of signal transduction	biological_process	Any process that stops, prevents, or reduces the frequency, rate or extent of signal transduction. [GOC:sm]	1	GO:0030512	1	K7GKY0	K7GKY0(GO:0030512)
GO:0009967	6	7	positive regulation of signal transduction	biological_process	Any process that activates or increases the frequency, rate or extent of signal transduction. [GOC:sm]	5	GO:0045747;GO:0032008;GO:0034157;GO:0045880;GO:0034165	4	I3LT15;I3LF05;I3LPC6;F1S9L2	I3LT15(GO:0045747);I3LF05(GO:0032008);I3LPC6(GO:0045880);F1S9L2(GO:0034157;GO:0034165)
GO:0010468	6	6	regulation of gene expression	biological_process	Any process that modulates the frequency, rate or extent of gene expression. Gene expression is the process in which a gene's coding sequence is converted into a mature gene product or products (proteins or RNA). This includes the production of an RNA transcript as well as any processing to produce a mature RNA product or an mRNA or circRNA (for protein-coding genes) and the translation of that m…	8	GO:0070940;GO:1900364;GO:0070816;GO:0006355;GO:0006357;GO:0010628;GO:2000144;GO:0045944	9	C9E1C9;F1RP31;F1SG36;F1RU26;F1SJG5;F1RWS7;F1SEA5;F6Q8T7;I3LM88	C9E1C9(GO:0045944;GO:0045944;GO:0070816;GO:1900364);F1RP31(GO:0006355;GO:0006355;GO:0045944);F1SG36(GO:0006355);F1RU26(GO:0006355;GO:0006357;GO:2000144);F1SJG5(GO:0006355);F1RWS7(GO:0070940);F1SEA5(GO:0010628);F6Q8T7(GO:0006355;GO:0006357;GO:0006357;GO:0045944);I3LM88(GO:0006357;GO:0045944)
GO:0045786	6	6	negative regulation of cell cycle	biological_process	Any process that stops, prevents or reduces the rate or extent of progression through the cell cycle. [GOC:dph, GOC:go_curators, GOC:tb]	1	GO:0071157	1	C9E1C9	C9E1C9(GO:0071157)
GO:0045787	6	6	positive regulation of cell cycle	biological_process	Any process that activates or increases the rate or extent of progression through the cell cycle. [GOC:go_curators]	2	GO:0045737;GO:0071157	2	F6Q8T7;C9E1C9	F6Q8T7(GO:0045737);C9E1C9(GO:0071157)
GO:0016311	6	6	dephosphorylation	biological_process	The process of removing one or more phosphoric (ester or anhydride) residues from a molecule. [ISBN:0198506732]	2	GO:0006470;GO:0070940	1	F1RWS7	F1RWS7(GO:0006470;GO:0070940)
GO:0016310	6	6	phosphorylation	biological_process	The process of introducing a phosphate group into a molecule, usually with the formation of a phosphoric ester, a phosphoric anhydride or a phosphoric amide. [ISBN:0198506732]	5	GO:0016310;GO:0006468;GO:0018105;GO:0070816;GO:0006165	5	I3LT15;F1RPV8;F6Q8T7;C9E1C9;G9BWQ2	I3LT15(GO:0006468;GO:0006468);F1RPV8(GO:0006165);F6Q8T7(GO:0006468);C9E1C9(GO:0006468;GO:0006468;GO:0070816);G9BWQ2(GO:0006468;GO:0016310;GO:0018105)
GO:0070201	6	6	regulation of establishment of protein localization	biological_process	Any process that modulates the frequency, rate or extent of the directed movement of a protein to a specific location. [GOC:BHF, GOC:mah]	1	GO:0050709	1	F1S9L2	F1S9L2(GO:0050709)
GO:0033578	6	9	protein glycosylation in Golgi	biological_process	The addition of a carbohydrate or carbohydrate derivative unit to a protein amino acid in any compartment of the Golgi apparatus. [GOC:mah, GOC:pr, PMID:12042244]	1	GO:0033578	1	F1SA54	F1SA54(GO:0033578)
GO:0005765	6	8	lysosomal membrane	cellular_component	The lipid bilayer surrounding the lysosome and separating its contents from the cell cytoplasm. [GOC:ai]	1	GO:0005765	2	F1S8G9;I3LF05	F1S8G9(GO:0005765);I3LF05(GO:0005765)
GO:0016433	6	8	rRNA (adenine) methyltransferase activity	molecular_function	Catalysis of the reaction: S-adenosyl-L-methionine + rRNA = S-adenosyl-L-homocysteine + rRNA containing methyladenine. [EC:2.1.1.-]	1	GO:0000179	1	F1RHJ0	F1RHJ0(GO:0000179)
GO:0009117	6	8	nucleotide metabolic process	biological_process	The chemical reactions and pathways involving a nucleotide, a nucleoside that is esterified with (ortho)phosphate or an oligophosphate at any hydroxyl group on the glycose moiety; may be mono-, di- or triphosphate; this definition includes cyclic nucleotides (nucleoside cyclic phosphates). [GOC:ma]	4	GO:0006228;GO:0006241;GO:0006183;GO:0006165	1	F1RPV8	F1RPV8(GO:0006165;GO:0006183;GO:0006228;GO:0006241)
GO:0009119	6	8	ribonucleoside metabolic process	biological_process	The chemical reactions and pathways involving any ribonucleoside, a nucleoside in which purine or pyrimidine base is linked to a ribose (beta-D-ribofuranose) molecule. [CHEBI:18254, GOC:jl]	3	GO:0006228;GO:0006241;GO:0006183	1	F1RPV8	F1RPV8(GO:0006183;GO:0006228;GO:0006241)
GO:0034723	6	7	DNA replication-dependent nucleosome organization	biological_process	The formation or destruction of chromatin structures on newly replicated DNA, coupled to strand elongation. [GOC:mah, PMID:17510629]	1	GO:0006335	1	F1S7L7	F1S7L7(GO:0006335)
GO:0035455	6	6	response to interferon-alpha	biological_process	Any process that results in a change in state or activity of a cell or an organism (in terms of movement, secretion, enzyme production, gene expression, etc.) as a result of an interferon-alpha stimulus. Interferon-alpha is a type I interferon. [GOC:sl, PMID:11356686]	1	GO:0035457	1	F1SCY2	F1SCY2(GO:0035457)
GO:0051224	6	8	negative regulation of protein transport	biological_process	Any process that stops, prevents, or reduces the frequency, rate or extent of the directed movement of a protein into, out of or within a cell, or between cells, by means of some agent such as a transporter or pore. [GOC:ai]	1	GO:0050709	1	F1S9L2	F1S9L2(GO:0050709)
GO:2001020	6	7	regulation of response to DNA damage stimulus	biological_process	Any process that modulates the frequency, rate or extent of response to DNA damage stimulus. [GOC:obol]	1	GO:0006282	1	C9E1C9	C9E1C9(GO:0006282)
GO:0034121	6	8	regulation of toll-like receptor signaling pathway	biological_process	Any process that modulates the frequency, rate, or extent of toll-like receptor signaling pathway. [GOC:add, PMID:16551253, PMID:17328678]	2	GO:0034157;GO:0034165	1	F1S9L2	F1S9L2(GO:0034157;GO:0034165)
GO:0002699	6	6	positive regulation of immune effector process	biological_process	Any process that activates or increases the frequency, rate, or extent of an immune effector process. [GOC:add]	1	GO:2000553	1	F1S9L2	F1S9L2(GO:2000553)
GO:0050994	6	7	regulation of lipid catabolic process	biological_process	Any process that modulates the frequency, rate, or extent of the chemical reactions and pathways resulting in the breakdown of lipids. [GOC:ai]	1	GO:0031998	1	F1SUE6	F1SUE6(GO:0031998;GO:0031998)
GO:0006897	6	6	endocytosis	biological_process	A vesicle-mediated transport process in which cells take up external materials or membrane constituents by the invagination of a small region of the plasma membrane to form a new membrane-bounded vesicle. [GOC:mah, ISBN:0198506732, ISBN:0716731363]	1	GO:0006898	1	E7CXS1	E7CXS1(GO:0006898)
GO:0005813	6	7	centrosome	cellular_component	A structure comprised of a core structure (in most organisms, a pair of centrioles) and peripheral material from which a microtubule-based structure, such as a spindle apparatus, is organized. Centrosomes occur close to the nucleus during interphase in many eukaryotic cells, though in animal cells it changes continually during the cell-division cycle. [GOC:mah, ISBN:0198547684]	1	GO:0005813	2	F1RWS7;F1RNN4	F1RWS7(GO:0005813);F1RNN4(GO:0005813;GO:0005813)
GO:0006412	6	8	translation	biological_process	The cellular metabolic process in which a protein is formed, using the sequence of a mature mRNA or circRNA molecule to specify the sequence of amino acids in a polypeptide chain. Translation is mediated by the ribosome, and begins with the formation of a ternary complex between aminoacylated initiator methionine tRNA, GTP, and initiation factor 2, which subsequently associates with the small sub…	1	GO:0006412	1	I3LTC4	I3LTC4(GO:0006412)
GO:0046527	6	6	glucosyltransferase activity	molecular_function	Catalysis of the transfer of a glucosyl group to an acceptor molecule, typically another carbohydrate or a lipid. [ISBN:0198506732]	1	GO:0003980	1	F1RP50	F1RP50(GO:0003980;GO:0003980)
GO:0043043	6	7	peptide biosynthetic process	biological_process	The chemical reactions and pathways resulting in the formation of peptides, compounds of 2 or more (but usually less than 100) amino acids where the alpha carboxyl group of one is bound to the alpha amino group of another. This may include the translation of a precursor protein and its subsequent processing into a functional peptide. [CHEBI:16670, GOC:dph, GOC:jl]	1	GO:0006412	1	I3LTC4	I3LTC4(GO:0006412)
GO:0006281	6	8	DNA repair	biological_process	The process of restoring DNA after damage. Genomes are subject to damage by chemical and physical agents in the environment (e.g. UV and ionizing radiations, chemical mutagens, fungal and bacterial toxins, etc.) and by free radicals or alkylating agents endogenously generated in metabolism. DNA is also damaged because of errors during its replication. A variety of different DNA repair pathways ha…	2	GO:0006289;GO:0006281	2	F6Q8T7;F1SNA6	F6Q8T7(GO:0006281;GO:0006289);F1SNA6(GO:0006281;GO:0006281)
GO:0009259	6	9	ribonucleotide metabolic process	biological_process	The chemical reactions and pathways involving a ribonucleotide, a compound consisting of ribonucleoside (a base linked to a ribose sugar) esterified with a phosphate group at either the 3' or 5'-hydroxyl group of the sugar. [GOC:go_curators, ISBN:0198506732]	3	GO:0006228;GO:0006241;GO:0006183	1	F1RPV8	F1RPV8(GO:0006183;GO:0006228;GO:0006241)
GO:0004519	6	6	endonuclease activity	molecular_function	Catalysis of the hydrolysis of ester linkages within nucleic acids by creating internal breaks. [GOC:mah, ISBN:0198547684]	1	GO:0033897	1	F1SBX8	F1SBX8(GO:0033897)
GO:0046914	6	6	transition metal ion binding	molecular_function	Interacting selectively and non-covalently with a transition metal ions; a transition metal is an element whose atom has an incomplete d-subshell of extranuclear electrons, or which gives rise to a cation or cations with an incomplete d-subshell. Transition metals often have more than one valency state. Biologically relevant transition metals include vanadium, manganese, iron, copper, cobalt, nic…	2	GO:0005507;GO:0008270	3	P79379;I3LUD1;I3LM88	P79379(GO:0008270);I3LUD1(GO:0005507;GO:0008270);I3LM88(GO:0008270)
GO:0090305	6	7	nucleic acid phosphodiester bond hydrolysis	biological_process	The nucleic acid metabolic process in which the phosphodiester bonds between nucleotides are cleaved by hydrolysis. [GOC:dph, GOC:tb]	1	GO:0090502	1	F1SBX8	F1SBX8(GO:0090502)
GO:0008420	6	9	CTD phosphatase activity	molecular_function	Catalysis of the reaction: phospho-(DNA-directed RNA polymerase) + H2O = (DNA-directed RNA polymerase) + phosphate. [EC:3.1.3.16]	1	GO:0008420	1	F1RWS7	F1RWS7(GO:0008420;GO:0008420)
GO:0002790	6	8	peptide secretion	biological_process	The controlled release of a peptide from a cell or a tissue. [GOC:add]	1	GO:0009306	1	F1SED4	F1SED4(GO:0009306)
GO:0034660	6	8	ncRNA metabolic process	biological_process	The chemical reactions and pathways involving non-coding RNA transcripts (ncRNAs). [GOC:mah]	5	GO:0016180;GO:0000154;GO:0030490;GO:0006364;GO:0031167	3	F1RFZ6;F1STY6;F1RHJ0	F1RFZ6(GO:0006364;GO:0006364;GO:0030490);F1STY6(GO:0016180);F1RHJ0(GO:0000154;GO:0031167)
GO:1903035	6	7	negative regulation of response to wounding	biological_process	Any process that stops, prevents or reduces the frequency, rate or extent of response to wounding. [GO_REF:0000058, GOC:kmv, GOC:TermGenie, pmid:19164535]	1	GO:0061045	1	K7GKY0	K7GKY0(GO:0061045)
GO:0004175	6	6	endopeptidase activity	molecular_function	Catalysis of the hydrolysis of internal, alpha-peptide bonds in a polypeptide chain. [http://merops.sanger.ac.uk/about/glossary.htm#ENDOPEPTIDASE]	3	GO:0004252;GO:0004190;GO:0042500	2	F1S8G9;F1SUE6	F1S8G9(GO:0004190;GO:0042500);F1SUE6(GO:0004252;GO:0004252)
GO:0051603	6	7	proteolysis involved in cellular protein catabolic process	biological_process	The hydrolysis of a peptide bond or bonds within a protein as part of the chemical reactions and pathways resulting in the breakdown of a protein by individual cells. [GOC:ai, GOC:dph, GOC:tb]	1	GO:0071712	1	F1RP50	F1RP50(GO:0071712)
GO:0008417	6	6	fucosyltransferase activity	molecular_function	Catalysis of the transfer of a fucosyl group to an acceptor molecule, typically another carbohydrate or a lipid. [GOC:ai]	1	GO:0008424	1	F1SA54	F1SA54(GO:0008424;GO:0008424)
GO:0016462	6	6	pyrophosphatase activity	molecular_function	Catalysis of the hydrolysis of a pyrophosphate bond between two phosphate groups, leaving one phosphate on each of the two fragments. [EC:3.6.1.-, GOC:curators]	5	GO:0008094;GO:0003924;GO:0004004;GO:0016887;GO:0004386	5	F1RFL5;F6Q8T7;I3LM88;K7GKN2;F1SJG5	F1RFL5(GO:0004004;GO:0004386);F6Q8T7(GO:0008094);I3LM88(GO:0016887);K7GKN2(GO:0003924;GO:0003924;GO:0003924);F1SJG5(GO:0016887)
GO:0031329	6	6	regulation of cellular catabolic process	biological_process	Any process that modulates the frequency, rate or extent of the chemical reactions and pathways resulting in the breakdown of substances, carried out by individual cells. [GOC:mah]	2	GO:0031998;GO:0010506	2	I3LF05;F1SUE6	I3LF05(GO:0010506);F1SUE6(GO:0031998;GO:0031998)
GO:0031326	6	6	regulation of cellular biosynthetic process	biological_process	Any process that modulates the frequency, rate or extent of the chemical reactions and pathways resulting in the formation of substances, carried out by individual cells. [GOC:mah]	7	GO:0070940;GO:0070816;GO:0006355;GO:0006357;GO:0045944;GO:2000144;GO:0043923	8	C9E1C9;F1RP31;F1SG36;F1RU26;F1SJG5;F1RWS7;F6Q8T7;I3LM88	C9E1C9(GO:0045944;GO:0045944;GO:0070816);F1RP31(GO:0006355;GO:0006355;GO:0045944);F1SG36(GO:0006355);F1RU26(GO:0006355;GO:0006357;GO:2000144);F1SJG5(GO:0006355);F1RWS7(GO:0043923;GO:0070940);F6Q8T7(GO:0006355;GO:0006357;GO:0006357;GO:0045944);I3LM88(GO:0006357;GO:0045944)
GO:0031325	6	6	positive regulation of cellular metabolic process	biological_process	Any process that activates or increases the frequency, rate or extent of the chemical reactions and pathways by which individual cells transform chemical substances. [GOC:mah]	5	GO:2001168;GO:0045737;GO:0033129;GO:0045944;GO:2000144	5	F6Q8T7;F1RP31;C9E1C9;F1RU26;I3LM88	F6Q8T7(GO:0045737;GO:0045944);F1RP31(GO:0045944);C9E1C9(GO:0033129;GO:0033129;GO:0045944;GO:0045944;GO:2001168;GO:2001168);F1RU26(GO:2000144);I3LM88(GO:0045944)
GO:0031324	6	6	negative regulation of cellular metabolic process	biological_process	Any process that stops, prevents, or reduces the frequency, rate or extent of the chemical reactions and pathways by which individual cells transform chemical substances. [GOC:mah]	5	GO:0010951;GO:1900364;GO:0001933;GO:0010466;GO:2000117	3	K7GKY0;C9E1C9;Q0Z8R0	K7GKY0(GO:0001933;GO:0010951);C9E1C9(GO:1900364);Q0Z8R0(GO:0010466;GO:2000117)
GO:0051028	6	9	mRNA transport	biological_process	The directed movement of mRNA, messenger ribonucleic acid, into, out of or within a cell, or between cells, by means of some agent such as a transporter or pore. [GOC:ai]	2	GO:0016973;GO:0006406	1	F1SJQ4	F1SJQ4(GO:0006406;GO:0016973)
GO:0010498	6	8	proteasomal protein catabolic process	biological_process	The chemical reactions and pathways resulting in the breakdown of a protein or peptide by hydrolysis of its peptide bonds that is mediated by the proteasome. [GOC:tb]	1	GO:0071712	1	F1RP50	F1RP50(GO:0071712)
GO:0021953	6	6	central nervous system neuron differentiation	biological_process	The process in which a relatively unspecialized cell acquires specialized features of a neuron whose cell body resides in the central nervous system. [GO_REF:0000021, GOC:cls, GOC:dgh, GOC:dph, GOC:jid, GOC:mtg_15jun06]	1	GO:0021522	1	I3LPC6	I3LPC6(GO:0021522)
GO:0002718	6	7	regulation of cytokine production involved in immune response	biological_process	Any process that modulates the frequency, rate, or extent of cytokine production that contributes to an immune response. [GOC:add]	1	GO:2000553	1	F1S9L2	F1S9L2(GO:2000553)
GO:0017015	7	8	regulation of transforming growth factor beta receptor signaling pathway	biological_process	Any process that modulates the frequency, rate or extent of activity of any TGF-beta receptor signaling pathway. [GOC:mah]	1	GO:0030512	1	K7GKY0	K7GKY0(GO:0030512)
GO:0017016	7	7	Ras GTPase binding	molecular_function	Interacting selectively and non-covalently with any member of the Ras superfamily of monomeric GTPases. [GOC:mah]	1	GO:0017048	1	I3LH80	I3LH80(GO:0017048)
GO:0006515	7	8	protein quality control for misfolded or incompletely synthesized proteins	biological_process	The chemical reactions and pathways resulting in the breakdown of misfolded or attenuated proteins. [GOC:jl]	1	GO:0071712	1	F1RP50	F1RP50(GO:0071712)
GO:0018279	7	10	protein N-linked glycosylation via asparagine	biological_process	The glycosylation of protein via the N4 atom of peptidyl-asparagine forming N4-glycosyl-L-asparagine; the most common form is N-acetylglucosaminyl asparagine; N-acetylgalactosaminyl asparagine and N4 glucosyl asparagine also occur. This modification typically occurs in extracellular peptides with an N-X-(ST) motif. Partial modification has been observed to occur with cysteine, rather than serine …	1	GO:0018279	1	F1RP50	F1RP50(GO:0018279)
GO:0072503	7	9	cellular divalent inorganic cation homeostasis	biological_process	Any process involved in the maintenance of an internal steady state of divalent cations at the level of a cell. [GOC:mah]	2	GO:0051480;GO:0006882	2	P79379;Q06A97	P79379(GO:0006882);Q06A97(GO:0051480)
GO:0010562	7	7	positive regulation of phosphorus metabolic process	biological_process	Any process that increases the frequency, rate or extent of the chemical reactions and pathways involving phosphorus or compounds containing phosphorus. [GOC:dph, GOC:tb]	2	GO:0033129;GO:0045737	2	F6Q8T7;C9E1C9	F6Q8T7(GO:0045737);C9E1C9(GO:0033129;GO:0033129)
GO:0010563	7	7	negative regulation of phosphorus metabolic process	biological_process	Any process that decreases the frequency, rate or extent of the chemical reactions and pathways involving phosphorus or compounds containing phosphorus. [GOC:dph, GOC:tb]	1	GO:0001933	1	K7GKY0	K7GKY0(GO:0001933)
GO:0017111	7	7	nucleoside-triphosphatase activity	molecular_function	Catalysis of the reaction: a nucleoside triphosphate + H2O = nucleoside diphosphate + phosphate. [EC:3.6.1.15]	5	GO:0008094;GO:0003924;GO:0004004;GO:0016887;GO:0004386	5	F1RFL5;F6Q8T7;I3LM88;K7GKN2;F1SJG5	F1RFL5(GO:0004004;GO:0004386);F6Q8T7(GO:0008094);I3LM88(GO:0016887);K7GKN2(GO:0003924;GO:0003924;GO:0003924);F1SJG5(GO:0016887)
GO:0050684	7	9	regulation of mRNA processing	biological_process	Any process that modulates the frequency, rate or extent of mRNA processing, those processes involved in the conversion of a primary mRNA transcript into a mature mRNA prior to its translation into polypeptide. [GOC:ai]	1	GO:1900364	1	C9E1C9	C9E1C9(GO:1900364)
GO:0050680	7	7	negative regulation of epithelial cell proliferation	biological_process	Any process that stops, prevents or reduces the rate or extent of epithelial cell proliferation. [GOC:ai]	2	GO:0050680;GO:0010839	2	K7GKY0;I3LPC6	K7GKY0(GO:0010839);I3LPC6(GO:0050680)
GO:0035710	7	8	CD4-positive, alpha-beta T cell activation	biological_process	The change in morphology and behavior of a CD4-positive, alpha-beta T cell resulting from exposure to a mitogen, cytokine, chemokine, cellular ligand, or an antigen for which it is specific. [CL:0000624, GOC:BHF]	2	GO:0043367;GO:0035710	1	F1S9L2	F1S9L2(GO:0035710;GO:0043367)
GO:0031293	7	8	membrane protein intracellular domain proteolysis	biological_process	The proteolytic cleavage of a transmembrane protein leading to the release of an intracellular domain. [PMID:12808018]	1	GO:0031293	1	F1S8G9	F1S8G9(GO:0031293)
GO:0031297	7	9	replication fork processing	biological_process	The process in which a DNA replication fork that has stalled is restored to a functional state and replication is restarted. The stalling may be due to DNA damage, DNA secondary structure, bound proteins, dNTP shortage, or other causes. [GOC:vw, PMID:11459955, PMID:15367656, PMID:17660542]	1	GO:0031297	1	C9E1C9	C9E1C9(GO:0031297)
GO:0071712	7	10	ER-associated misfolded protein catabolic process	biological_process	The chemical reactions and pathways resulting in the breakdown of misfolded proteins transported from the endoplasmic reticulum and targeted to cytoplasmic proteasomes for degradation. [GOC:mah, GOC:vw, PMID:14607247, PMID:19520858]	1	GO:0071712	1	F1RP50	F1RP50(GO:0071712)
GO:0051248	7	7	negative regulation of protein metabolic process	biological_process	Any process that stops, prevents, or reduces the frequency, rate or extent of chemical reactions and pathways involving a protein. [GOC:ai]	4	GO:0010951;GO:2000117;GO:0001933;GO:0010466	2	K7GKY0;Q0Z8R0	K7GKY0(GO:0001933;GO:0010951);Q0Z8R0(GO:0010466;GO:2000117)
GO:0051247	7	7	positive regulation of protein metabolic process	biological_process	Any process that activates or increases the frequency, rate or extent of the chemical reactions and pathways involving a protein. [GOC:ai]	3	GO:2001168;GO:0033129;GO:0045737	2	F6Q8T7;C9E1C9	F6Q8T7(GO:0045737);C9E1C9(GO:0033129;GO:0033129;GO:2001168;GO:2001168)
GO:0031399	7	8	regulation of protein modification process	biological_process	Any process that modulates the frequency, rate or extent of the covalent alteration of one or more amino acid residues within a protein. [GOC:mah, GOC:tb]	7	GO:2001168;GO:0000079;GO:0045737;GO:0051438;GO:0031056;GO:0001933;GO:0033129	4	F1S6I1;F6Q8T7;C9E1C9;K7GKY0	F1S6I1(GO:0051438);F6Q8T7(GO:0000079;GO:0045737);C9E1C9(GO:0031056;GO:0033129;GO:0033129;GO:2001168;GO:2001168);K7GKY0(GO:0001933)
GO:0006354	7	9	DNA-templated transcription, elongation	biological_process	The extension of an RNA molecule after transcription initiation and promoter clearance at a DNA-dependent RNA polymerase promoter by the addition of ribonucleotides catalyzed by an RNA polymerase. [GOC:mah, GOC:txnOH, PMID:15020047, PMID:18280161]	1	GO:0006368	1	C9E1C9	C9E1C9(GO:0006368)
GO:0006355	7	10	regulation of transcription, DNA-templated	biological_process	Any process that modulates the frequency, rate or extent of cellular DNA-templated transcription. [GOC:go_curators, GOC:txnOH]	6	GO:0070940;GO:0070816;GO:0006355;GO:0006357;GO:0045944;GO:2000144	8	C9E1C9;F1RP31;F1SG36;F1RU26;F1SJG5;F1RWS7;F6Q8T7;I3LM88	C9E1C9(GO:0045944;GO:0045944;GO:0070816);F1RP31(GO:0006355;GO:0006355;GO:0045944);F1SG36(GO:0006355);F1RU26(GO:0006355;GO:0006357;GO:2000144);F1SJG5(GO:0006355);F1RWS7(GO:0070940);F6Q8T7(GO:0006355;GO:0006357;GO:0006357;GO:0045944);I3LM88(GO:0006357;GO:0045944)
GO:0004869	7	7	cysteine-type endopeptidase inhibitor activity	molecular_function	Stops, prevents or reduces the activity of a cysteine-type endopeptidase, any enzyme that hydrolyzes peptide bonds in polypeptides by a mechanism in which the sulfhydryl group of a cysteine residue at the active center acts as a nucleophile. [GOC:dph, GOC:tb]	1	GO:0004869	1	Q0Z8R0	Q0Z8R0(GO:0004869;GO:0004869;GO:0004869)
GO:0006406	7	10	mRNA export from nucleus	biological_process	The directed movement of mRNA from the nucleus to the cytoplasm. [GOC:ma]	2	GO:0016973;GO:0006406	1	F1SJQ4	F1SJQ4(GO:0006406;GO:0016973)
GO:0097659	7	9	nucleic acid-templated transcription	biological_process	The cellular synthesis of RNA on a template of nucleic acid (DNA or RNA). [GOC:pr, GOC:txnOH, GOC:vw]	3	GO:0006351;GO:0061614;GO:0006366	4	F1RU26;I3LM88;F6Q8T7;F1RP31	F1RU26(GO:0061614);I3LM88(GO:0006366);F6Q8T7(GO:0006366);F1RP31(GO:0006351;GO:0006351)
GO:2001141	7	8	regulation of RNA biosynthetic process	biological_process	Any process that modulates the frequency, rate or extent of RNA biosynthetic process. [GOC:dph]	7	GO:0070940;GO:0070816;GO:0006355;GO:0006357;GO:0045944;GO:2000144;GO:0043923	8	C9E1C9;F1RP31;F1SG36;F1RU26;F1SJG5;F1RWS7;F6Q8T7;I3LM88	C9E1C9(GO:0045944;GO:0045944;GO:0070816);F1RP31(GO:0006355;GO:0006355;GO:0045944);F1SG36(GO:0006355);F1RU26(GO:0006355;GO:0006357;GO:2000144);F1SJG5(GO:0006355);F1RWS7(GO:0043923;GO:0070940);F6Q8T7(GO:0006355;GO:0006357;GO:0006357;GO:0045944);I3LM88(GO:0006357;GO:0045944)
GO:1902533	7	8	positive regulation of intracellular signal transduction	biological_process	Any process that activates or increases the frequency, rate or extent of intracellular signal transduction. [GOC:BHF, GOC:dph, GOC:signaling, GOC:tb, GOC:TermGenie]	1	GO:0032008	1	I3LF05	I3LF05(GO:0032008)
GO:0033674	7	10	positive regulation of kinase activity	biological_process	Any process that activates or increases the frequency, rate or extent of kinase activity, the catalysis of the transfer of a phosphate group, usually from ATP, to a substrate molecule. [GOC:mah]	1	GO:0045737	1	F6Q8T7	F6Q8T7(GO:0045737)
GO:0046939	7	9	nucleotide phosphorylation	biological_process	The process of introducing one or more phosphate groups into a nucleotide to produce a phosphorylated nucleoside. [GOC:ai]	1	GO:0006165	1	F1RPV8	F1RPV8(GO:0006165)
GO:0043539	7	7	protein serine/threonine kinase activator activity	molecular_function	Binds to and increases the activity of a protein serine/threonine kinase. [GOC:go_curators]	1	GO:0061575	1	F6Q8T7	F6Q8T7(GO:0061575)
GO:0006221	7	10	pyrimidine nucleotide biosynthetic process	biological_process	The chemical reactions and pathways resulting in the formation of a pyrimidine nucleotide, a compound consisting of nucleoside (a pyrimidine base linked to a deoxyribose or ribose sugar) esterified with a phosphate group at either the 3' or 5'-hydroxyl group of the sugar. [GOC:go_curators, ISBN:0198506732]	2	GO:0006228;GO:0006241	1	F1RPV8	F1RPV8(GO:0006228;GO:0006241)
GO:0043921	7	11	modulation by host of viral transcription	biological_process	Any process in which a host organism modulates the frequency, rate or extent of viral transcription. [GOC:jl]	1	GO:0043923	1	F1RWS7	F1RWS7(GO:0043923)
GO:0050657	7	7	nucleic acid transport	biological_process	The directed movement of nucleic acids, single or double-stranded polynucleotides involved in the storage, transmission and transfer of genetic information, into, out of or within a cell, or between cells, by means of some agent such as a transporter or pore. [GOC:ai, ISBN:0198506732]	2	GO:0016973;GO:0006406	1	F1SJQ4	F1SJQ4(GO:0006406;GO:0016973)
GO:0006470	7	8	protein dephosphorylation	biological_process	The process of removing one or more phosphoric residues from a protein. [GOC:hb]	2	GO:0006470;GO:0070940	1	F1RWS7	F1RWS7(GO:0006470;GO:0070940)
GO:0034155	7	9	regulation of toll-like receptor 7 signaling pathway	biological_process	Any process that modulates the frequency, rate, or extent of toll-like receptor 7 signaling pathway. [GOC:add, PMID:16551253, PMID:17328678]	1	GO:0034157	1	F1S9L2	F1S9L2(GO:0034157)
GO:0010506	7	7	regulation of autophagy	biological_process	Any process that modulates the frequency, rate or extent of autophagy. Autophagy is the process in which cells digest parts of their own cytoplasm. [GOC:dph, GOC:tb]	1	GO:0010506	1	I3LF05	I3LF05(GO:0010506)
GO:0090502	7	9	RNA phosphodiester bond hydrolysis, endonucleolytic	biological_process	The chemical reactions and pathways involving the hydrolysis of internal 3',5'-phosphodiester bonds in one or two strands of ribonucleotides. [GOC:dph, GOC:tb]	1	GO:0090502	1	F1SBX8	F1SBX8(GO:0090502)
GO:0008270	7	7	zinc ion binding	molecular_function	Interacting selectively and non-covalently with zinc (Zn) ions. [GOC:ai]	1	GO:0008270	3	P79379;I3LUD1;I3LM88	P79379(GO:0008270);I3LUD1(GO:0008270);I3LM88(GO:0008270)
GO:1902416	7	7	positive regulation of mRNA binding	biological_process	Any process that activates or increases the frequency, rate or extent of mRNA binding. [GOC:rb, GOC:TermGenie, PMID:22890846]	1	GO:1903839	1	C9E1C9	C9E1C9(GO:1903839)
GO:0016072	7	9	rRNA metabolic process	biological_process	The chemical reactions and pathways involving rRNA, ribosomal RNA, a structural constituent of ribosomes. [ISBN:0198506732]	4	GO:0000154;GO:0030490;GO:0006364;GO:0031167	2	F1RHJ0;F1RFZ6	F1RHJ0(GO:0000154;GO:0031167);F1RFZ6(GO:0006364;GO:0006364;GO:0030490)
GO:0016073	7	9	snRNA metabolic process	biological_process	The chemical reactions and pathways involving snRNA, small nuclear RNA, any of various low-molecular-mass RNA molecules found in the eukaryotic nucleus as components of the small nuclear ribonucleoprotein. [ISBN:0198506732]	1	GO:0016180	1	F1STY6	F1STY6(GO:0016180)
GO:0016894	7	7	endonuclease activity, active with either ribo- or deoxyribonucleic acids and producing 3'-phosphomonoesters	molecular_function	Catalysis of the hydrolysis of ester linkages within nucleic acids by creating internal breaks to yield 3'-phosphomonoesters. [GOC:mah]	1	GO:0033897	1	F1SBX8	F1SBX8(GO:0033897)
GO:0009260	7	10	ribonucleotide biosynthetic process	biological_process	The chemical reactions and pathways resulting in the formation of a ribonucleotide, a compound consisting of ribonucleoside (a base linked to a ribose sugar) esterified with a phosphate group at either the 3' or 5'-hydroxyl group of the sugar. [GOC:go_curators, ISBN:0198506732]	3	GO:0006228;GO:0006241;GO:0006183	1	F1RPV8	F1RPV8(GO:0006183;GO:0006228;GO:0006241)
GO:1902686	7	9	mitochondrial outer membrane permeabilization involved in programmed cell death	biological_process	The process by which the mitochondrial outer membrane becomes permeable to the passing of proteins and other molecules from the intermembrane space to the cytosol as part of a programmed cell death process. [GO_REF:0000060, GOC:mtg_apoptosis, GOC:pg, GOC:TermGenie, PMID:20151314]	1	GO:0097345	1	I3LDJ9	I3LDJ9(GO:0097345)
GO:0019220	7	7	regulation of phosphate metabolic process	biological_process	Any process that modulates the frequency, rate or extent of the chemical reactions and pathways involving phosphates. [GOC:go_curators]	4	GO:0001933;GO:0033129;GO:0045737;GO:0000079	3	K7GKY0;F6Q8T7;C9E1C9	K7GKY0(GO:0001933);F6Q8T7(GO:0000079;GO:0045737);C9E1C9(GO:0033129;GO:0033129)
GO:0000179	7	9	rRNA (adenine-N6,N6-)-dimethyltransferase activity	molecular_function	Catalysis of the dimethylation two adjacent A residues in the loop closing the 3'-terminal stem of the 18S rRNA, using S-adenosyl-L-methionine as a methyl donor. [ISBN:1555811337, PMID:10690410]	1	GO:0000179	1	F1RHJ0	F1RHJ0(GO:0000179)
GO:0002822	7	7	regulation of adaptive immune response based on somatic recombination of immune receptors built from immunoglobulin superfamily domains	biological_process	Any process that modulates the frequency, rate, or extent of an adaptive immune response based on somatic recombination of immune receptors built from immunoglobulin superfamily domains. An example of this process is found in the Gnathostomata. [GOC:add, GOC:mtg_sensu]	1	GO:2000553	1	F1S9L2	F1S9L2(GO:2000553)
GO:0002821	7	7	positive regulation of adaptive immune response	biological_process	Any process that activates or increases the frequency, rate, or extent of an adaptive immune response. [GOC:add]	1	GO:2000553	1	F1S9L2	F1S9L2(GO:2000553)
GO:0045747	7	8	positive regulation of Notch signaling pathway	biological_process	Any process that activates or increases the frequency, rate or extent of the Notch signaling pathway. [GOC:go_curators]	1	GO:0045747	1	I3LT15	I3LT15(GO:0045747)
GO:1903845	7	7	negative regulation of cellular response to transforming growth factor beta stimulus	biological_process	Any process that stops, prevents or reduces the frequency, rate or extent of cellular response to transforming growth factor beta stimulus. [GO_REF:0000058, GOC:BHF, GOC:BHF_miRNA, GOC:rph, GOC:TermGenie, PMID:22269326]	1	GO:0030512	1	K7GKY0	K7GKY0(GO:0030512)
GO:0032269	7	8	negative regulation of cellular protein metabolic process	biological_process	Any process that stops, prevents, or reduces the frequency, rate or extent of the chemical reactions and pathways involving a protein, occurring at the level of an individual cell. [GOC:mah]	4	GO:0010951;GO:2000117;GO:0001933;GO:0010466	2	K7GKY0;Q0Z8R0	K7GKY0(GO:0001933;GO:0010951);Q0Z8R0(GO:0010466;GO:2000117)
GO:0002724	7	9	regulation of T cell cytokine production	biological_process	Any process that modulates the frequency, rate, or extent of T cell cytokine production. [GOC:add]	1	GO:2000553	1	F1S9L2	F1S9L2(GO:2000553)
GO:0002720	7	8	positive regulation of cytokine production involved in immune response	biological_process	Any process that activates or increases the frequency, rate, or extent of cytokine production that contributes to an immune response. [GOC:add]	1	GO:2000553	1	F1S9L2	F1S9L2(GO:2000553)
GO:0042451	7	9	purine nucleoside biosynthetic process	biological_process	The chemical reactions and pathways resulting in the formation of any purine nucleoside, one of a family of organic molecules consisting of a purine base covalently bonded to a sugar ribose (a ribonucleoside) or deoxyribose (a deoxyribonucleoside). [GOC:go_curators]	1	GO:0006183	1	F1RPV8	F1RPV8(GO:0006183)
GO:0042455	7	9	ribonucleoside biosynthetic process	biological_process	The chemical reactions and pathways resulting in the formation of any ribonucleoside, a nucleoside in which purine or pyrimidine base is linked to a ribose (beta-D-ribofuranose) molecule. [CHEBI:18254, GOC:jl]	3	GO:0006228;GO:0006241;GO:0006183	1	F1RPV8	F1RPV8(GO:0006183;GO:0006228;GO:0006241)
GO:0042981	7	7	regulation of apoptotic process	biological_process	Any process that modulates the occurrence or rate of cell death by apoptotic process. [GOC:jl, GOC:mtg_apoptosis]	2	GO:0043065;GO:0042981	2	I3LDJ9;F1RUL8	I3LDJ9(GO:0043065);F1RUL8(GO:0042981)
GO:2000112	7	7	regulation of cellular macromolecule biosynthetic process	biological_process	Any process that modulates the frequency, rate or extent of cellular macromolecule biosynthetic process. [GOC:obol]	6	GO:0070940;GO:0070816;GO:0006355;GO:0006357;GO:0045944;GO:2000144	8	C9E1C9;F1RP31;F1SG36;F1RU26;F1SJG5;F1RWS7;F6Q8T7;I3LM88	C9E1C9(GO:0045944;GO:0045944;GO:0070816);F1RP31(GO:0006355;GO:0006355;GO:0045944);F1SG36(GO:0006355);F1RU26(GO:0006355;GO:0006357;GO:2000144);F1SJG5(GO:0006355);F1RWS7(GO:0070940);F6Q8T7(GO:0006355;GO:0006357;GO:0006357;GO:0045944);I3LM88(GO:0006357;GO:0045944)
GO:0034163	7	9	regulation of toll-like receptor 9 signaling pathway	biological_process	Any process that modulates the frequency, rate, or extent of toll-like receptor 9 signaling pathway. [GOC:add, PMID:16551253, PMID:17328678]	1	GO:0034165	1	F1S9L2	F1S9L2(GO:0034165)
GO:1903311	7	8	regulation of mRNA metabolic process	biological_process	Any process that modulates the frequency, rate or extent of mRNA metabolic process. [GO_REF:0000058, GOC:TermGenie, GOC:vw]	1	GO:1900364	1	C9E1C9	C9E1C9(GO:1900364)
GO:0071156	7	7	regulation of cell cycle arrest	biological_process	Any process that modulates the rate, frequency, or extent of cell cycle arrest, the process in which the cell cycle is halted during one of the normal phases. [GOC:mah]	1	GO:0071157	1	C9E1C9	C9E1C9(GO:0071157)
GO:0071157	7	8	negative regulation of cell cycle arrest	biological_process	Any process that decreases the rate, frequency, or extent of cell cycle arrest, the process in which the cell cycle is halted during one of the normal phases. [GOC:mah]	1	GO:0071157	1	C9E1C9	C9E1C9(GO:0071157)
GO:0006335	7	9	DNA replication-dependent nucleosome assembly	biological_process	The formation of nucleosomes on newly replicated DNA, coupled to strand elongation. [GOC:mah]	1	GO:0006335	1	F1S7L7	F1S7L7(GO:0006335)
GO:0006875	7	9	cellular metal ion homeostasis	biological_process	Any process involved in the maintenance of an internal steady state of metal ions at the level of a cell. [GOC:ai, GOC:mah]	2	GO:0051480;GO:0006882	2	P79379;Q06A97	P79379(GO:0006882);Q06A97(GO:0051480)
GO:0009150	7	10	purine ribonucleotide metabolic process	biological_process	The chemical reactions and pathways involving a purine ribonucleotide, a compound consisting of ribonucleoside (a purine base linked to a ribose sugar) esterified with a phosphate group at either the 3' or 5'-hydroxyl group of the sugar. [GOC:go_curators, ISBN:0198506732]	1	GO:0006183	1	F1RPV8	F1RPV8(GO:0006183)
GO:0010557	7	7	positive regulation of macromolecule biosynthetic process	biological_process	Any process that increases the rate, frequency or extent of the chemical reactions and pathways resulting in the formation of a macromolecule, any molecule of high relative molecular mass, the structure of which essentially comprises the multiple repetition of units derived, actually or conceptually, from molecules of low relative molecular mass. [GOC:dph, GOC:tb]	2	GO:0045944;GO:2000144	5	F6Q8T7;F1RP31;C9E1C9;F1RU26;I3LM88	F6Q8T7(GO:0045944);F1RP31(GO:0045944);C9E1C9(GO:0045944;GO:0045944);F1RU26(GO:2000144);I3LM88(GO:0045944)
GO:0045089	7	8	positive regulation of innate immune response	biological_process	Any process that activates or increases the frequency, rate or extent of the innate immune response, the organism's first line of defense against infection. [GOC:ebc]	2	GO:0034157;GO:0034165	1	F1S9L2	F1S9L2(GO:0034157;GO:0034165)
GO:0010629	7	7	negative regulation of gene expression	biological_process	Any process that decreases the frequency, rate or extent of gene expression. Gene expression is the process in which a gene's coding sequence is converted into a mature gene product or products (proteins or RNA). This includes the production of an RNA transcript as well as any processing to produce a mature RNA product or an mRNA or circRNA (for protein-coding genes) and the translation of that m…	1	GO:1900364	1	C9E1C9	C9E1C9(GO:1900364)
GO:0010628	7	7	positive regulation of gene expression	biological_process	Any process that increases the frequency, rate or extent of gene expression. Gene expression is the process in which a gene's coding sequence is converted into a mature gene product or products (proteins or RNA). This includes the production of an RNA transcript as well as any processing to produce a mature RNA product or an mRNA or circRNA (for protein-coding genes) and the translation of that m…	3	GO:0010628;GO:0045944;GO:2000144	6	C9E1C9;F1RP31;F1RU26;F1SEA5;F6Q8T7;I3LM88	C9E1C9(GO:0045944;GO:0045944);F1RP31(GO:0045944);F1RU26(GO:2000144);F1SEA5(GO:0010628);F6Q8T7(GO:0045944);I3LM88(GO:0045944)
GO:0009218	7	10	pyrimidine ribonucleotide metabolic process	biological_process	The chemical reactions and pathways involving a pyrimidine ribonucleotide, a compound consisting of nucleoside (a pyrimidine base linked to a ribose sugar) esterified with a phosphate group at either the 3' or 5'-hydroxyl group of the sugar. [GOC:go_curators, ISBN:0198506732]	2	GO:0006228;GO:0006241	1	F1RPV8	F1RPV8(GO:0006228;GO:0006241)
GO:1903837	7	7	regulation of mRNA 3'-UTR binding	biological_process	Any process that modulates the frequency, rate or extent of mRNA 3'-UTR binding. [GO_REF:0000059, GOC:als, GOC:TermGenie, PMID:19575011]	1	GO:1903839	1	C9E1C9	C9E1C9(GO:1903839)
GO:0061575	7	8	cyclin-dependent protein serine/threonine kinase activator activity	molecular_function	Binds to and increases the activity of a cyclin-dependent protein serine/threonine kinase. [GOC:dph, PMID:2569363, PMID:3322810]	1	GO:0061575	1	F6Q8T7	F6Q8T7(GO:0061575)
GO:2000144	7	12	positive regulation of DNA-templated transcription, initiation	biological_process	Any process that activates or increases the frequency, rate or extent of DNA-templated transcription initiation. [GOC:mah, GOC:txnOH]	1	GO:2000144	1	F1RU26	F1RU26(GO:2000144)
GO:0045616	7	8	regulation of keratinocyte differentiation	biological_process	Any process that modulates the frequency, rate or extent of keratinocyte differentiation. [GOC:go_curators]	1	GO:0045616	1	K7GKY0	K7GKY0(GO:0045616)
GO:0006165	7	10	nucleoside diphosphate phosphorylation	biological_process	The process of introducing a phosphate group into a nucleoside diphosphate to produce a nucleoside triphosphate. [GOC:ai]	1	GO:0006165	1	F1RPV8	F1RPV8(GO:0006165)
GO:0006164	7	10	purine nucleotide biosynthetic process	biological_process	The chemical reactions and pathways resulting in the formation of a purine nucleotide, a compound consisting of nucleoside (a purine base linked to a deoxyribose or ribose sugar) esterified with a phosphate group at either the 3' or 5'-hydroxyl group of the sugar. [GOC:go_curators, ISBN:0198506732]	1	GO:0006183	1	F1RPV8	F1RPV8(GO:0006183)
GO:0090113	7	8	regulation of ER to Golgi vesicle-mediated transport by GTP hydrolysis	biological_process	The GTP hydrolysis process that modulates the rate, frequency, or extent of ER to Golgi vesicle-mediated transport, the directed movement of substances from the endoplasmic reticulum (ER) to the Golgi, mediated by COP II vesicles. [GOC:ascb_2009, GOC:dph, GOC:tb]	1	GO:0003400	1	F1SED4	F1SED4(GO:0003400)
GO:0006366	7	11	transcription from RNA polymerase II promoter	biological_process	The synthesis of RNA from a DNA template by RNA polymerase II, originating at an RNA polymerase II promoter. Includes transcription of messenger RNA (mRNA) and certain small nuclear RNAs (snRNAs). [GOC:jl, GOC:txnOH, ISBN:0321000382]	2	GO:0061614;GO:0006366	3	F1RU26;F6Q8T7;I3LM88	F1RU26(GO:0061614);F6Q8T7(GO:0006366);I3LM88(GO:0006366)
GO:0071357	7	7	cellular response to type I interferon	biological_process	Any process that results in a change in state or activity of a cell (in terms of movement, secretion, enzyme production, gene expression, etc.) as a result of a type I interferon stimulus. Type I interferons include the interferon-alpha, beta, delta, episilon, zeta, kappa, tau, and omega gene families. [GOC:mah, PR:000025848]	1	GO:0071357	1	K7GKN2	K7GKN2(GO:0071357)
GO:0009165	7	9	nucleotide biosynthetic process	biological_process	The chemical reactions and pathways resulting in the formation of nucleotides, any nucleoside that is esterified with (ortho)phosphate or an oligophosphate at any hydroxyl group on the glycose moiety; may be mono-, di- or triphosphate; this definition includes cyclic-nucleotides (nucleoside cyclic phosphates). [GOC:go_curators]	3	GO:0006228;GO:0006241;GO:0006183	1	F1RPV8	F1RPV8(GO:0006183;GO:0006228;GO:0006241)
GO:0097322	7	7	7SK snRNA binding	molecular_function	Interacting selectively and non-covalently with a 7SK small nuclear RNA (7SK snRNA). [GOC:nhn, PMID:21853533]	1	GO:0097322	1	C9E1C9	C9E1C9(GO:0097322)
GO:0046632	7	8	alpha-beta T cell differentiation	biological_process	The process in which a precursor cell type acquires the specialized features of an alpha-beta T cell. An alpha-beta T cell is a T cell that expresses an alpha-beta T cell receptor complex. [CL:0000789, GOC:ai]	1	GO:0043367	1	F1S9L2	F1S9L2(GO:0043367)
GO:0030162	7	7	regulation of proteolysis	biological_process	Any process that modulates the frequency, rate or extent of the hydrolysis of a peptide bond or bonds within a protein. [GOC:mah]	3	GO:0010951;GO:2000117;GO:0010466	2	K7GKY0;Q0Z8R0	K7GKY0(GO:0010951);Q0Z8R0(GO:0010466;GO:2000117)
GO:0001096	7	7	TFIIF-class transcription factor binding	molecular_function	Interacting selectively and non-covalently with a basal RNA polymerase II transcription factor of the TFIIF class, one of the factors involved in formation of the preinitiation complex (PIC) by RNA polymerase II and defined as a basal or general transcription factor. [GOC:krc, PMID:16858867]	1	GO:0001096	1	F1RWS7	F1RWS7(GO:0001096)
GO:1903900	7	7	regulation of viral life cycle	biological_process	Any process that modulates the frequency, rate or extent of viral life cycle. [GO_REF:0000058, GOC:TermGenie, PMID:18005716]	2	GO:1901253;GO:0045071	2	K7GKN2;F1S9L2	K7GKN2(GO:0045071;GO:0045071;GO:1901253);F1S9L2(GO:0045071;GO:0045071)
GO:1903901	7	8	negative regulation of viral life cycle	biological_process	Any process that stops, prevents or reduces the frequency, rate or extent of viral life cycle. [GO_REF:0000058, GOC:TermGenie, PMID:18005716]	2	GO:1901253;GO:0045071	2	K7GKN2;F1S9L2	K7GKN2(GO:0045071;GO:0045071;GO:1901253);F1S9L2(GO:0045071;GO:0045071)
GO:0045859	7	10	regulation of protein kinase activity	biological_process	Any process that modulates the frequency, rate or extent of protein kinase activity. [GOC:go_curators]	2	GO:0000079;GO:0045737	1	F6Q8T7	F6Q8T7(GO:0000079;GO:0045737)
GO:0070647	7	8	protein modification by small protein conjugation or removal	biological_process	A protein modification process in which one or more groups of a small protein, such as ubiquitin or a ubiquitin-like protein, are covalently attached to or removed from a target protein. [GOC:mah]	2	GO:0070979;GO:0016567	2	F1S6I1;I3L7Q8	F1S6I1(GO:0016567);I3L7Q8(GO:0070979)
GO:0050434	7	8	positive regulation of viral transcription	biological_process	Any process that activates or increases the frequency, rate or extent of viral transcription. [GOC:ai]	1	GO:0043923	1	F1RWS7	F1RWS7(GO:0043923)
GO:0006468	7	8	protein phosphorylation	biological_process	The process of introducing a phosphate group on to a protein. [GOC:hb]	3	GO:0006468;GO:0018105;GO:0070816	4	I3LT15;F6Q8T7;C9E1C9;G9BWQ2	I3LT15(GO:0006468;GO:0006468);F6Q8T7(GO:0006468);C9E1C9(GO:0006468;GO:0006468;GO:0070816);G9BWQ2(GO:0006468;GO:0018105)
GO:0000154	7	11	rRNA modification	biological_process	The covalent alteration of one or more nucleotides within an rRNA molecule to produce an rRNA molecule with a sequence that differs from that coded genetically. [GOC:curators]	2	GO:0000154;GO:0031167	1	F1RHJ0	F1RHJ0(GO:0000154;GO:0031167)
GO:0046128	7	9	purine ribonucleoside metabolic process	biological_process	The chemical reactions and pathways involving any ribonucleoside, a nucleoside in which purine base is linked to a ribose (beta-D-ribofuranose) molecule. [GOC:ai]	1	GO:0006183	1	F1RPV8	F1RPV8(GO:0006183)
GO:0048259	7	8	regulation of receptor-mediated endocytosis	biological_process	Any process that modulates the frequency, rate or extent of receptor mediated endocytosis, the uptake of external materials by cells, utilizing receptors to ensure specificity of transport. [GOC:go_curators, GOC:tb]	1	GO:2000369	1	I3LT15	I3LT15(GO:2000369)
GO:0005507	7	7	copper ion binding	molecular_function	Interacting selectively and non-covalently with copper (Cu) ions. [GOC:ai]	1	GO:0005507	1	I3LUD1	I3LUD1(GO:0005507)
GO:0098771	7	7	inorganic ion homeostasis	biological_process	Any process involved in the maintenance of an internal steady state of inorganic ions within an organism or cell. [GOC:dos]	2	GO:0051480;GO:0006882	2	P79379;Q06A97	P79379(GO:0006882);Q06A97(GO:0051480)
GO:0001701	7	8	in utero embryonic development	biological_process	The process whose specific outcome is the progression of the embryo in the uterus over time, from formation of the zygote in the oviduct, to birth. An example of this process is found in Mus musculus. [GOC:go_curators, GOC:mtg_sensu]	1	GO:0001701	1	F1RU26	F1RU26(GO:0001701)
GO:0002706	7	7	regulation of lymphocyte mediated immunity	biological_process	Any process that modulates the frequency, rate, or extent of lymphocyte mediated immunity. [GOC:add]	1	GO:2000553	1	F1S9L2	F1S9L2(GO:2000553)
GO:0002705	7	7	positive regulation of leukocyte mediated immunity	biological_process	Any process that activates or increases the frequency, rate, or extent of leukocyte mediated immunity. [GOC:add]	1	GO:2000553	1	F1S9L2	F1S9L2(GO:2000553)
GO:0002702	7	7	positive regulation of production of molecular mediator of immune response	biological_process	Any process that activates or increases the frequency, rate, or extent of the production of molecular mediator of immune response. [GOC:add]	1	GO:2000553	1	F1S9L2	F1S9L2(GO:2000553)
GO:0034470	7	9	ncRNA processing	biological_process	Any process that results in the conversion of one or more primary non-coding RNA (ncRNA) transcripts into one or more mature ncRNA molecules. [GOC:mah]	5	GO:0016180;GO:0000154;GO:0030490;GO:0006364;GO:0031167	3	F1RFZ6;F1STY6;F1RHJ0	F1RFZ6(GO:0006364;GO:0006364;GO:0030490);F1STY6(GO:0016180);F1RHJ0(GO:0000154;GO:0031167)
GO:0018193	7	8	peptidyl-amino acid modification	biological_process	The alteration of an amino acid residue in a peptide. [GOC:mah]	2	GO:0018105;GO:0018279	2	F1RP50;G9BWQ2	F1RP50(GO:0018279);G9BWQ2(GO:0018105)
GO:0045880	7	8	positive regulation of smoothened signaling pathway	biological_process	Any process that activates or increases the frequency, rate or extent of smoothened signaling. [GOC:go_curators]	1	GO:0045880	1	I3LPC6	I3LPC6(GO:0045880)
GO:0043068	7	7	positive regulation of programmed cell death	biological_process	Any process that activates or increases the frequency, rate or extent of programmed cell death, cell death resulting from activation of endogenous cellular processes. [GOC:jl]	2	GO:0043065;GO:0043068	1	I3LDJ9	I3LDJ9(GO:0043065;GO:0043068)
GO:1905515	7	8	non-motile cilium assembly	biological_process	The aggregation, arrangement and bonding together of a set of components to form a non-motile cilium. [GO_REF:0000079, GOC:cilia, GOC:kmv, GOC:TermGenie, PMID:14521833, PMID:14521834]	1	GO:1905515	1	I3LPC6	I3LPC6(GO:1905515)
GO:0019217	7	7	regulation of fatty acid metabolic process	biological_process	Any process that modulates the frequency, rate or extent of the chemical reactions and pathways involving fatty acids. [GOC:go_curators]	1	GO:0031998	1	F1SUE6	F1SUE6(GO:0031998;GO:0031998)
GO:0033897	7	9	ribonuclease T2 activity	molecular_function	Catalysis of the two-stage endonucleolytic cleavage to nucleoside 3'-phosphates and 3'-phosphooligonucleotides with 2',3'-cyclic phosphate intermediates. [EC:3.1.27.1]	1	GO:0033897	1	F1SBX8	F1SBX8(GO:0033897)
GO:0010837	7	7	regulation of keratinocyte proliferation	biological_process	Any process that modulates the rate, frequency or extent of keratinocyte proliferation. Keratinocyte proliferation is the multiplication or reproduction of keratinocytes, resulting in the expansion of a cell population. [GOC:dph, GOC:tb]	1	GO:0010839	1	K7GKY0	K7GKY0(GO:0010839)
GO:0045737	7	13	positive regulation of cyclin-dependent protein serine/threonine kinase activity	biological_process	Any process that activates or increases the frequency, rate or extent of CDK activity. [GOC:go_curators, GOC:pr]	1	GO:0045737	1	F6Q8T7	F6Q8T7(GO:0045737)
GO:0032270	7	8	positive regulation of cellular protein metabolic process	biological_process	Any process that activates or increases the frequency, rate or extent of the chemical reactions and pathways involving a protein, occurring at the level of an individual cell. [GOC:mah]	3	GO:2001168;GO:0033129;GO:0045737	2	F6Q8T7;C9E1C9	F6Q8T7(GO:0045737);C9E1C9(GO:0033129;GO:0033129;GO:2001168;GO:2001168)
GO:0050709	7	9	negative regulation of protein secretion	biological_process	Any process that stops, prevents, or reduces the frequency, rate or extent of the controlled release of a protein from a cell. [GOC:ai]	1	GO:0050709	1	F1S9L2	F1S9L2(GO:0050709)
GO:0010948	7	7	negative regulation of cell cycle process	biological_process	Any process that decreases the rate, frequency or extent of a cellular process that is involved in the progression of biochemical and morphological phases and events that occur in a cell during successive cell replication or nuclear replication events. [GOC:dph, GOC:tb]	1	GO:0071157	1	C9E1C9	C9E1C9(GO:0071157)
GO:0051259	7	7	protein oligomerization	biological_process	The process of creating protein oligomers, compounds composed of a small number, usually between three and ten, of component monomers; protein oligomers may be composed of different or identical monomers. Oligomers may be formed by the polymerization of a number of monomers or the depolymerization of a large protein polymer. [GOC:ai]	1	GO:0051260	1	F1SUE6	F1SUE6(GO:0051260)
GO:0051253	7	8	negative regulation of RNA metabolic process	biological_process	Any process that stops, prevents, or reduces the frequency, rate or extent of the chemical reactions and pathways involving RNA. [GOC:ai]	1	GO:1900364	1	C9E1C9	C9E1C9(GO:1900364)
GO:0051254	7	8	positive regulation of RNA metabolic process	biological_process	Any process that activates or increases the frequency, rate or extent of the chemical reactions and pathways involving RNA. [GOC:ai]	2	GO:0045944;GO:2000144	5	F6Q8T7;F1RP31;C9E1C9;F1RU26;I3LM88	F6Q8T7(GO:0045944);F1RP31(GO:0045944);C9E1C9(GO:0045944;GO:0045944);F1RU26(GO:2000144);I3LM88(GO:0045944)
GO:0004190	7	7	aspartic-type endopeptidase activity	molecular_function	Catalysis of the hydrolysis of internal, alpha-peptide bonds in a polypeptide chain by a mechanism in which a water molecule bound by the side chains of aspartic residues at the active center acts as a nucleophile. [ISBN:0198506732]	2	GO:0042500;GO:0004190	1	F1S8G9	F1S8G9(GO:0004190;GO:0042500)
GO:0016607	7	8	nuclear speck	cellular_component	A discrete extra-nucleolar subnuclear domain, 20-50 in number, in which splicing factors are seen to be localized by immunofluorescence microscopy. [http://www.cellnucleus.com/]	1	GO:0016607	3	F1SLA2;F1RWS7;F1SJQ4	F1SLA2(GO:0016607);F1RWS7(GO:0016607);F1SJQ4(GO:0016607)
GO:0016605	7	8	PML body	cellular_component	A class of nuclear body; they react against SP100 auto-antibodies (PML, promyelocytic leukemia); cells typically contain 10-30 PML bodies per nucleus; alterations in the localization of PML bodies occurs after viral infection. [GOC:ma, PMID:10944585]	1	GO:0016605	1	C9E1C9	C9E1C9(GO:0016605)
GO:0045935	7	7	positive regulation of nucleobase-containing compound metabolic process	biological_process	Any cellular process that activates or increases the frequency, rate or extent of the chemical reactions and pathways involving nucleobases, nucleosides, nucleotides and nucleic acids. [GOC:go_curators]	2	GO:0045944;GO:2000144	5	F6Q8T7;F1RP31;C9E1C9;F1RU26;I3LM88	F6Q8T7(GO:0045944);F1RP31(GO:0045944);C9E1C9(GO:0045944;GO:0045944);F1RU26(GO:2000144);I3LM88(GO:0045944)
GO:0045934	7	7	negative regulation of nucleobase-containing compound metabolic process	biological_process	Any cellular process that stops, prevents, or reduces the frequency, rate or extent of the chemical reactions and pathways involving nucleobases, nucleosides, nucleotides and nucleic acids. [GOC:go_curators]	1	GO:1900364	1	C9E1C9	C9E1C9(GO:1900364)
GO:0009142	7	9	nucleoside triphosphate biosynthetic process	biological_process	The chemical reactions and pathways resulting in the formation of a nucleoside triphosphate, a compound consisting of a nucleobase linked to a deoxyribose or ribose sugar esterified with triphosphate on the sugar. [GOC:go_curators, ISBN:0198506732]	3	GO:0006228;GO:0006241;GO:0006183	1	F1RPV8	F1RPV8(GO:0006183;GO:0006228;GO:0006241)
GO:0009144	7	9	purine nucleoside triphosphate metabolic process	biological_process	The chemical reactions and pathways involving purine nucleoside triphosphate, a compound consisting of a purine base linked to a ribose or deoxyribose sugar esterified with triphosphate on the sugar. [GOC:go_curators, ISBN:0198506732]	1	GO:0006183	1	F1RPV8	F1RPV8(GO:0006183)
GO:0009147	7	9	pyrimidine nucleoside triphosphate metabolic process	biological_process	The chemical reactions and pathways involving pyrimidine nucleoside triphosphate, a compound consisting of a pyrimidine base linked to a ribose or deoxyribose sugar esterified with triphosphate on the sugar. [GOC:go_curators, ISBN:0198506732]	2	GO:0006228;GO:0006241	1	F1RPV8	F1RPV8(GO:0006228;GO:0006241)
GO:0051168	7	8	nuclear export	biological_process	The directed movement of substances out of the nucleus. [GOC:ai]	2	GO:0016973;GO:0006406	1	F1SJQ4	F1SJQ4(GO:0006406;GO:0016973)
GO:0000079	7	12	regulation of cyclin-dependent protein serine/threonine kinase activity	biological_process	Any process that modulates the frequency, rate or extent of cyclin-dependent protein serine/threonine kinase activity. [GOC:go_curators, GOC:pr]	2	GO:0000079;GO:0045737	1	F6Q8T7	F6Q8T7(GO:0000079;GO:0045737)
GO:0001841	7	7	neural tube formation	biological_process	The formation of a tube from the flat layer of ectodermal cells known as the neural plate. This will give rise to the central nervous system. [GOC:dph, ISBN:0878932437]	1	GO:0001841	1	I3LPC6	I3LPC6(GO:0001841)
GO:0055080	7	7	cation homeostasis	biological_process	Any process involved in the maintenance of an internal steady state of cations within an organism or cell. [GOC:ceb, GOC:jid, GOC:mah]	2	GO:0051480;GO:0006882	2	P79379;Q06A97	P79379(GO:0006882);Q06A97(GO:0051480)
GO:1990837	7	7	sequence-specific double-stranded DNA binding	molecular_function	Interacting selectively and non-covalently with double-stranded DNA of a specific nucleotide composition, e.g. GC-rich DNA binding, or with a specific sequence motif or type of DNA, e.g. promotor binding or rDNA binding. [GOC:dos, GOC:sl]	4	GO:0000978;GO:0001164;GO:0000979;GO:0000977	5	F1SLA2;F1RU26;F1RP31;C9E1C9;I3LM88	F1SLA2(GO:0001164);F1RU26(GO:0000977;GO:0000978);F1RP31(GO:0000977);C9E1C9(GO:0000979);I3LM88(GO:0000978)
GO:0043547	7	7	positive regulation of GTPase activity	biological_process	Any process that activates or increases the activity of a GTPase. [GOC:jl, GOC:mah]	1	GO:0043547	1	F1SED4	F1SED4(GO:0043547)
GO:0010638	7	7	positive regulation of organelle organization	biological_process	Any process that increases the frequency, rate or extent of a process involved in the formation, arrangement of constituent parts, or disassembly of an organelle. [GOC:dph, GOC:tb]	2	GO:2001168;GO:0033129	1	C9E1C9	C9E1C9(GO:0033129;GO:0033129;GO:2001168;GO:2001168)
GO:0033044	7	7	regulation of chromosome organization	biological_process	Any process that modulates the frequency, rate or extent of a process involved in the formation, arrangement of constituent parts, or disassembly of a chromosome. [GOC:mah]	3	GO:2001168;GO:0033129;GO:0031056	1	C9E1C9	C9E1C9(GO:0031056;GO:0033129;GO:0033129;GO:2001168;GO:2001168)
GO:0031998	7	9	regulation of fatty acid beta-oxidation	biological_process	Any process that modulates the frequency, rate or extent of fatty acid bbeta-oxidation. [GOC:mah]	1	GO:0031998	1	F1SUE6	F1SUE6(GO:0031998;GO:0031998)
GO:0010466	7	10	negative regulation of peptidase activity	biological_process	Any process that stops or reduces the rate of peptidase activity, the hydrolysis of peptide bonds within proteins. [GOC:dph, GOC:tb]	3	GO:0010951;GO:2000117;GO:0010466	2	K7GKY0;Q0Z8R0	K7GKY0(GO:0010951);Q0Z8R0(GO:0010466;GO:2000117)
GO:0046921	7	7	alpha-(1->6)-fucosyltransferase activity	molecular_function	Catalysis of the transfer of an L-fucosyl group from GDP-beta-L-fucose to an acceptor molecule to form an alpha-(1->6) linkage. [GOC:ai]	1	GO:0008424	1	F1SA54	F1SA54(GO:0008424;GO:0008424)
GO:0044212	7	7	transcription regulatory region DNA binding	molecular_function	Interacting selectively and non-covalently with a DNA region that regulates the transcription of a region of DNA, which may be a gene, cistron, or operon. Binding may occur as a sequence specific interaction or as an interaction observed only once a factor has been recruited to the DNA by other factors. [GOC:jl, GOC:txnOH, SO:0005836]	5	GO:0000978;GO:0044212;GO:0001164;GO:0000979;GO:0000977	5	F1SLA2;F1RU26;F1RP31;C9E1C9;I3LM88	F1SLA2(GO:0001164);F1RU26(GO:0000977;GO:0000978);F1RP31(GO:0000977);C9E1C9(GO:0000979;GO:0044212;GO:0044212);I3LM88(GO:0000978)
GO:1904031	7	12	positive regulation of cyclin-dependent protein kinase activity	biological_process	Any process that activates or increases the frequency, rate or extent of cyclin-dependent protein kinase activity. [GO_REF:0000059, GOC:als, GOC:TermGenie, PMID:22995177]	1	GO:0045737	1	F6Q8T7	F6Q8T7(GO:0045737)
GO:1902554	7	7	serine/threonine protein kinase complex	cellular_component	A protein complex which is capable of protein serine/threonine kinase activity. [GOC:bhm, GOC:TermGenie, PMID:18191223]	2	GO:0008024;GO:0005675	2	F6Q8T7;C9E1C9	F6Q8T7(GO:0005675;GO:0005675;GO:0005675);C9E1C9(GO:0008024;GO:0008024;GO:0008024)
GO:0090101	7	8	negative regulation of transmembrane receptor protein serine/threonine kinase signaling pathway	biological_process	Any process that decreases the rate, frequency, or extent of the series of molecular signals generated as a consequence of a transmembrane receptor serine/threonine kinase binding to its physiological ligand. [GOC:dph, GOC:tb]	1	GO:0030512	1	K7GKY0	K7GKY0(GO:0030512)
GO:0035457	7	7	cellular response to interferon-alpha	biological_process	Any process that results in a change in state or activity of a cell (in terms of movement, secretion, enzyme production, gene expression, etc.) as a result of an interferon-alpha stimulus. Interferon-alpha is a type I interferon. [GOC:sl, PR:000024938]	1	GO:0035457	1	F1SCY2	F1SCY2(GO:0035457)
GO:0051223	7	7	regulation of protein transport	biological_process	Any process that modulates the frequency, rate or extent of the directed movement of a protein into, out of or within a cell, or between cells, by means of some agent such as a transporter or pore. [GOC:ai]	1	GO:0050709	1	F1S9L2	F1S9L2(GO:0050709)
GO:0034123	7	9	positive regulation of toll-like receptor signaling pathway	biological_process	Any process that activates or increases the frequency, rate, or extent of toll-like receptor signaling pathway. [GOC:add, PMID:16551253, PMID:17328678]	2	GO:0034157;GO:0034165	1	F1S9L2	F1S9L2(GO:0034157;GO:0034165)
GO:0052548	7	9	regulation of endopeptidase activity	biological_process	Any process that modulates the frequency, rate or extent of endopeptidase activity, the endohydrolysis of peptide bonds within proteins. [GOC:ai, GOC:hjd]	2	GO:0010951;GO:2000117	2	K7GKY0;Q0Z8R0	K7GKY0(GO:0010951);Q0Z8R0(GO:2000117)
GO:0009199	7	9	ribonucleoside triphosphate metabolic process	biological_process	The chemical reactions and pathways involving a ribonucleoside triphosphate, a compound consisting of a nucleobase linked to a ribose sugar esterified with triphosphate on the sugar. [GOC:go_curators, ISBN:0198506732]	3	GO:0006228;GO:0006241;GO:0006183	1	F1RPV8	F1RPV8(GO:0006183;GO:0006228;GO:0006241)
GO:0006898	7	7	receptor-mediated endocytosis	biological_process	An endocytosis process in which cell surface receptors ensure specificity of transport. A specific receptor on the cell surface binds tightly to the extracellular macromolecule (the ligand) that it recognizes; the plasma-membrane region containing the receptor-ligand complex then undergoes endocytosis, forming a transport vesicle containing the receptor-ligand complex and excluding most other pla…	1	GO:0006898	1	E7CXS1	E7CXS1(GO:0006898)
GO:0006282	7	8	regulation of DNA repair	biological_process	Any process that modulates the frequency, rate or extent of DNA repair. [GOC:go_curators]	1	GO:0006282	1	C9E1C9	C9E1C9(GO:0006282)
GO:0006289	7	9	nucleotide-excision repair	biological_process	A DNA repair process in which a small region of the strand surrounding the damage is removed from the DNA helix as an oligonucleotide. The small gap left in the DNA helix is filled in by the sequential action of DNA polymerase and DNA ligase. Nucleotide excision repair recognizes a wide range of substrates, including damage caused by UV irradiation (pyrimidine dimers and 6-4 photoproducts) and ch…	1	GO:0006289	1	F6Q8T7	F6Q8T7(GO:0006289)
GO:1902110	7	10	positive regulation of mitochondrial membrane permeability involved in apoptotic process	biological_process	Any positive regulation of mitochondrial membrane permeability that is involved in apoptotic process. [GOC:mtg_apoptosis, GOC:pm, GOC:TermGenie, PMID:19168129]	1	GO:0097345	1	I3LDJ9	I3LDJ9(GO:0097345)
GO:0043623	7	7	cellular protein complex assembly	biological_process	The aggregation, arrangement and bonding together of a set of components to form a protein complex, occurring at the level of an individual cell. [GOC:jl]	1	GO:0003374	1	K7GKN2	K7GKN2(GO:0003374)
GO:0003980	7	8	UDP-glucose:glycoprotein glucosyltransferase activity	molecular_function	Catalysis of the addition of UDP-glucose on to asparagine-linked (N-linked) oligosaccharides of the form Man7-9GlcNAc2 on incorrectly folded glycoproteins. [GOC:al, PMID:10764828]	1	GO:0003980	1	F1RP50	F1RP50(GO:0003980;GO:0003980)
GO:0061041	7	7	regulation of wound healing	biological_process	Any process that modulates the rate, frequency, or extent of the series of events that restore integrity to a damaged tissue, following an injury. [GOC:BHF, GOC:dph]	1	GO:0061045	1	K7GKY0	K7GKY0(GO:0061045)
GO:0061045	7	8	negative regulation of wound healing	biological_process	Any process that decreases the rate, frequency, or extent of the series of events that restore integrity to a damaged tissue, following an injury. [GOC:dph]	1	GO:0061045	1	K7GKY0	K7GKY0(GO:0061045)
GO:0002830	7	7	positive regulation of type 2 immune response	biological_process	Any process that activates or increases the frequency, rate, or extent of a type 2 immune response. [GOC:add]	1	GO:2000553	1	F1S9L2	F1S9L2(GO:2000553)
[truncated: 143 more rows]
